# Supplementary material
Source: publisher figshare collection journal article supplement (https://acs.figshare.com/ndownloader/files/5090917)

Supporting Information for

**Dragmacidin E Synthesis Studies. Preparation of a Model Cycloheptannelated Indole Fragment.**

Ken S. Feldman\* and Paiboon Ngermmeesri

*Department of Chemistry, the Pennsylvania State University, University Park,  
Pennsylvania 16802 USA*

|                                               |        |                                              |     |
|-----------------------------------------------|--------|----------------------------------------------|-----|
| General Experimental                          | S2     | <sup>1</sup> H NMR <b>11</b>                 | S30 |
| <b>8</b>                                      | S2     | <sup>13</sup> C NMR <b>11</b>                | S31 |
| <b>9</b>                                      | S4     | <sup>1</sup> H NMR <b>SM3</b>                | S32 |
| <b>SM1</b>                                    | S5     | <sup>13</sup> C NMR <b>SM3</b>               | S33 |
| <b>SM2</b>                                    | S6     | <sup>1</sup> H NMR <b>12</b>                 | S34 |
| <b>11</b>                                     | S7, S8 | <sup>13</sup> C NMR <b>12</b>                | S35 |
| <b>SM3</b>                                    | S7, S9 | <sup>1</sup> H NMR <b>SM4</b>                | S36 |
| <b>12</b>                                     | S9     | <sup>13</sup> C NMR <b>SM4</b>               | S37 |
| <b>SM4</b>                                    | S10    | <sup>1</sup> H NMR <b>SM5</b>                | S38 |
| <b>SM5</b>                                    | S11    | <sup>13</sup> C NMR <b>SM5</b>               | S39 |
| <b>13</b>                                     | S12    | <sup>1</sup> H NMR <b>13</b>                 | S40 |
| <b>15</b>                                     | S13    | <sup>13</sup> C NMR <b>13</b>                | S41 |
| <b>16</b>                                     | S14    | <sup>1</sup> H NMR <i>cis</i> - <b>15</b>    | S42 |
| <b>SM6</b>                                    | S15    | <sup>13</sup> C NMR <i>cis</i> - <b>15</b>   | S43 |
| <b>17</b>                                     | S16    | <sup>1</sup> H NMR <i>trans</i> - <b>15</b>  | S44 |
| <b>SM7</b>                                    | S17    | <sup>13</sup> C NMR <i>trans</i> - <b>15</b> | S45 |
| <b>18</b>                                     | S18    | <sup>1</sup> H NMR <b>16</b>                 | S46 |
| <sup>1</sup> H NMR <b>8</b>                   | S20    | <sup>13</sup> C NMR <b>16</b>                | S47 |
| <sup>13</sup> C NMR <b>8</b>                  | S21    | <sup>1</sup> H NMR <b>SM6</b>                | S48 |
| <sup>1</sup> H NMR <b>9</b>                   | S22    | <sup>13</sup> C NMR <b>SM6</b>               | S49 |
| <sup>13</sup> C NMR <b>9</b>                  | S23    | <sup>1</sup> H NMR <b>17</b>                 | S50 |
| <sup>1</sup> H NMR <b>SM1</b>                 | S24    | <sup>13</sup> C NMR <b>17</b>                | S51 |
| <sup>13</sup> C NMR <b>SM1</b>                | S25    | <sup>1</sup> H NMR <b>SM7</b>                | S52 |
| <sup>1</sup> H NMR <i>trans</i> - <b>SM2</b>  | S26    | <sup>13</sup> C NMR <b>SM7</b>               | S53 |
| <sup>13</sup> C NMR <i>trans</i> - <b>SM2</b> | S27    | <sup>1</sup> H NMR <b>18</b>                 | S54 |
| <sup>1</sup> H NMR <i>cis</i> - <b>SM2</b>    | S28    | <sup>13</sup> C NMR <b>18</b>                | S55 |
| <sup>13</sup> C NMR <i>cis</i> - <b>SM2</b>   | S29    | MM calc's of <b>15</b> -imine                | S56 |

**General Experimental.** Unless stated otherwise, moisture and oxygen sensitive reactions were carried out in flame-dried glassware under a nitrogen or argon atmosphere using anhydrous, deoxygenated solvents. Tetrahydrofuran was dried by passage through an activated alumina column under a nitrogen atmosphere or distillation from sodium benzophenone ketyl under an argon atmosphere. Dichloromethane and acetonitrile were dried by passage through an activated alumina column under a nitrogen atmosphere or distillation from calcium hydride under an argon atmosphere. HPLC grade acetonitrile was also used as received for large scale photochemical reactions and it did not significantly lower the yield of the product. Methanol was dried by distillation from calcium hydride under a nitrogen or argon atmosphere. Absolute ethanol was used as received. All other commercially obtained reagents were used as received. Microwave reactions were performed in the CEM Focused Microwave<sup>TM</sup> Synthesis System, Model Discover. Flash chromatography was performed on 32-63  $\mu\text{m}$  silica gel. The characterization data were obtained on the solid material that resulted from evaporation of the chromatography solvents used for purification. Melting points were taken with a Melt-Temp apparatus and are uncorrected. Chemical shifts of  $^1\text{H}$  NMR spectra are reported relative to  $\text{Me}_4\text{Si}$  ( $\delta$  0.00) or DMSO ( $\delta$  2.49) if the former was absent.  $^{13}\text{C}$  NMR spectra are reported relative to  $\text{Me}_4\text{Si}$  ( $\delta$  0.0), or  $\text{CDCl}_3$  ( $\delta$  77.0) or DMSO ( $\delta$  39.5) if the former was absent.

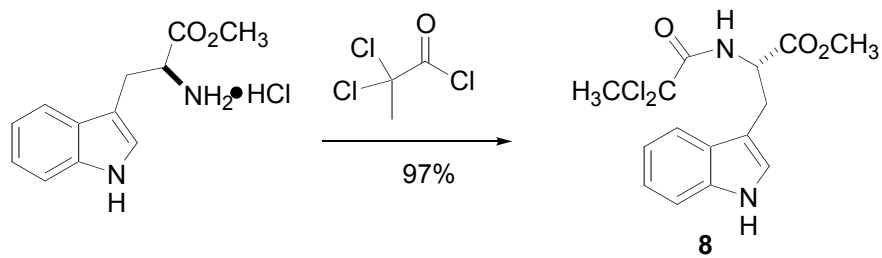

**Methyl 2-(2,2-Dichloropropionylamino)-3-(1*H*-indol-3-yl) Propionate (8).** To a solution of 2,2-dichloropropionic acid (90%, 6.7 mL, 59 mmol) in CH<sub>2</sub>Cl<sub>2</sub> (50 mL) was added 2 drops of DMF followed by oxalyl chloride (10.0 mL, 119 mmol). The reaction mixture was stirred for 2.5 h until bubbling stopped. The resulting yellow acid chloride solution was concentrated under reduced pressure and then redissolved in CH<sub>2</sub>Cl<sub>2</sub> (40 mL). The acid chloride solution was cannulated to an ice-cooled solution of L-tryptophan methyl ester hydrochloride (10.01 g, 39 mmol) and dimethylaminopyridine (10.05 g, 82 mmol) in CH<sub>2</sub>Cl<sub>2</sub> (60 mL). The resulting red solution was stirred in an ice bath for 3 h and then at room temperature for 12 h. The reaction mixture was poured into ice water (50 mL) and the organic layer was separated. The aqueous layer was extracted with CH<sub>2</sub>Cl<sub>2</sub> (2 x 50 mL). The combined organic layers were dried over anhydrous Na<sub>2</sub>SO<sub>4</sub> and concentrated under reduced pressure. The crude residue was purified by flash chromatography on silica gel (2:1 hexanes/EtOAc) to afford the dichloroamide **8** as a light brown solid (13.13 g, 97%). mp 143-144 °C;  $[\alpha]_D^{20} +51^\circ$  (*c* 1.00, CHCl<sub>3</sub>); IR (film) 3368, 3315, 1728, 1678 cm<sup>-1</sup>; <sup>1</sup>H NMR (300 MHz, CDCl<sub>3</sub>) δ 8.26 (br s, 1H), 7.55 (d, *J* = 7.8 Hz, 1H), 7.34 (d, *J* = 8.0 Hz, 1H), 7.29 (br s, 1H), 7.19 (ddd, *J* = 8.0, 7.0, 1.3 Hz, 1H), 7.11 (ddd, *J* = 7.8, 7.0, 1.1 Hz, 1H), 7.02 (d, *J* = 2.1 Hz, 1H), 4.86 (ddd, *J* = 7.7, 5.3, 5.3 Hz, 1H), 3.69 (s, 3H), 3.42 (dd, *J* = 18.5, 5.2 Hz, 1H), 3.37 (dd, *J* = 18.9, 5.1 Hz, 1H), 2.25 (s, 3 H); <sup>13</sup>C NMR (300 MHz, CDCl<sub>3</sub>) δ 171.4, 165.9, 136.1, 127.3, 123.0, 122.3, 119.7, 118.5, 111.3, 109.2, 82.1, 53.8, 52.6, 33.9, 27.2; LRMS(ESI) *m/z* (relative intensity) 365.0 (100%, M+Na<sup>+</sup>); HRMS (ESI) *m/z* calcd for [C<sub>15</sub>H<sub>16</sub>N<sub>2</sub>O<sub>3</sub>Cl<sub>2</sub>Na]<sup>+</sup>: 365.0436, found 365.0426.

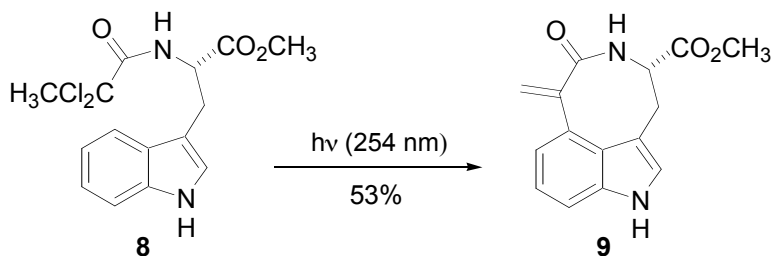

**Methyl 7-Methylene-6-oxo-1,3,4,5,6,7-hexahydro-azocino[4,5,6-*cd*]indole-4 Carboxylate (9).** A solution of dichloroamide **8** (150 mg, 0.44 mmol) in CH<sub>3</sub>CN (87.5 mL) in a quartz vessel was purged with dry argon for 30 min. This solution was irradiated at 254 nm in a Rayonet photochemical reactor for 3 h. The resulting light brown solution was concentrated under reduced pressure. The crude residue was purified by flash chromatography on silica gel (1:3 hexanes/EtOAc) to afford the bridged indole **9** as a yellow solid (63 mg, 53%). mp 194-195 °C;  $[\alpha]_D^{20}$  -347° (*c* 0.60, CHCl<sub>3</sub>); IR (film) 3305, 1741, 1653 cm<sup>-1</sup>; <sup>1</sup>H NMR (300 MHz, CDCl<sub>3</sub>) δ 8.42 (br s, 1H), 7.35 (ddd, *J* = 8.2, 4.5, 3.5 Hz, 1H), 7.20-7.15 (m, 2H), 7.07 (dd, *J* = 1.3, 1.2 Hz, 1H), 6.33 (d, *J* = 9 Hz, 1H), 5.60 (d, *J* = 0.9 Hz, 1H), 5.50 (d, *J* = 0.7 Hz, 1H), 5.07 (ddd, *J* = 11.8, 9.0, 2.8 Hz, 1H), 3.84 (s, 3H), 3.56 (ddd, *J* = 16.3, 3.0, 0.9 Hz, 1H), 3.29 (ddd, *J* = 16.3, 11.8, 0.9 Hz, 1H); <sup>13</sup>C NMR (300 MHz, CDCl<sub>3</sub>) δ 172.7, 171.7, 147.8, 136.6, 129.8, 124.2, 122.9, 122.0, 121.7, 116.6, 112.2, 110.4, 55.7, 52.9, 33.1; LRMS(ESI) *m/z* (relative intensity) 293.1 (97%, M+Na<sup>+</sup>); HRMS (ESI) *m/z* calcd for [C<sub>15</sub>H<sub>14</sub>N<sub>2</sub>O<sub>3</sub>Na]<sup>+</sup>: 293.0896, found 293.0902. Anal. Calcd for C<sub>15</sub>H<sub>14</sub>N<sub>2</sub>O<sub>3</sub>: C, 66.66; H, 5.22; N, 10.36. Found: C, 66.75; H, 5.32; N, 10.20.

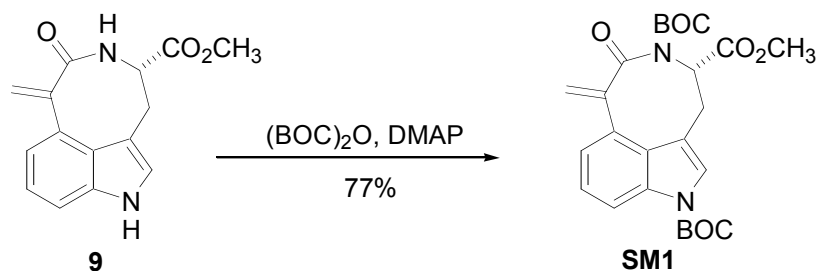

**1,5-Di-*tert*-butyl 4-Methyl 7-Methylene-6-oxo-3,4,6,7-tetrahydro-azocino[4,5,6-*cd*]indole 1,4,5-Tricarboxylate (SM1).** A solution of di-*tert*-butyldicarbonate (1.13 g, 5.18 mmol) in CH<sub>3</sub>CN (6 mL) was cannulated into a suspension of indole **9** (335 mg, 1.24 mmol) and 4-dimethylaminopyridine (34 mg, 0.28 mmol) in CH<sub>3</sub>CN (6 mL). After the addition was complete, the indole **9** slowly became soluble and it all went into solution in less than 10 min. The reaction mixture was stirred at room temperature for 2 h. The resulting dark brown solution was poured into ice water (20 mL) and extracted with ether (3 x 20 mL). The organic extracts were combined, washed with brine solution (20 mL), dried over anhydrous Na<sub>2</sub>SO<sub>4</sub>, and concentrated under reduced pressure. The crude residue was purified by flash chromatography on silica gel (3:2 hexanes/ether) to afford the desired protected product as a white solid (446 mg, 77%). mp 118-120 °C;  $[\alpha]_D^{20} +61^\circ$  (*c* 1.00, CHCl<sub>3</sub>); IR (film) 1734, 1693 cm<sup>-1</sup>; <sup>1</sup>H NMR (300 MHz, CDCl<sub>3</sub>) δ 8.30 (d, *J* = 6.5 Hz, 1H), 7.53 (s, 1H), 7.38-7.29 (m, 2H) 6.47 (d, *J* = 1.0 Hz, 1H), 6.05 (d, *J* = 1.0 Hz, 1H), 4.77 (dd, *J* = 12.7, 4.3 Hz, 1H), 3.85 (s, 3H), 3.30 (dd, *J* = 15.3, 4.3 Hz, 1H), 3.11 (ddd, *J* = 15.2, 12.8, 1.2 Hz, 1H), 1.67 (s, 9H), 1.08 (s, 9H); <sup>13</sup>C NMR (300 MHz, CDCl<sub>3</sub>) δ 174.3, 170.7, 151.4, 149.0, 144.6, 136.6, 129.5, 129.4, 127.2, 125.7, 124.3, 124.0, 116.1, 115.7, 83.9, 82.9, 57.4, 52.6, 28.1, 27.4, 26.7; LRMS(ESI) *m/z* (relative intensity) 493.2 (100%, M+Na<sup>+</sup>); HRMS (ESI) *m/z* calcd for [C<sub>25</sub>H<sub>30</sub>N<sub>2</sub>O<sub>7</sub>Na]<sup>+</sup>:

493.1951, found 493.1944. Anal. Calcd for  $C_{25}H_{30}N_2O_7$ : C, 63.82; H, 6.43; N, 5.95.

Found: C, 63.83; H, 6.47; N, 5.83.

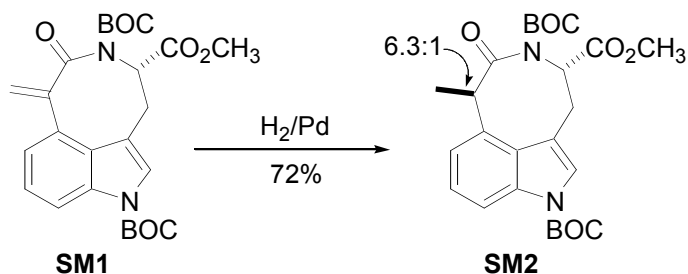

**1,5-Di-tert-butyl 4-Methyl 7-Methyl-6-oxo-3,4,6,7-tetrahydro-azocino[4,5,6-cd]indole 1,4,5-Tricarboxylate (SM2).** To a solution of indole **SM1** (483 mg, 1.03 mmol) in MeOH (15 mL) was added 10% w/w Pd/C (22 mg, 0.02 mmol). The reaction mixture was stirred under a  $H_2$  atmosphere (1atm) for 2 days. The resulting black suspension was filtered through a Celite pad and the filtrate was concentrated under reduced pressure. The crude residue was purified by flash chromatography on silica gel (1:1 hexanes/ether) to afford both the *trans*-methyl imide **SM2** as a white solid (309 mg, 62%) and the *cis*-methyl imide **SM2** as a white solid (49 mg, 10%). Major product: mp 167-168 °C;  $[\alpha]_D^{20}$  -296° (*c* 1.00,  $CHCl_3$ ); IR (film) 1734  $cm^{-1}$ ;  $^1H$  NMR (300 MHz,  $CDCl_3$ )  $\delta$  8.07 (d, *J* = 8.1 Hz, 1H), 7.44 (s, 1H), 7.29 (t, *J* = 7.9 Hz, 1H), 7.17 (d, *J* = 7.6 Hz, 1H), 5.59 (t, *J* = 9.5 Hz, 1H), 4.48 (q, *J* = 6.6 Hz, 1H), 3.84 (s, 3H), 3.57 (d, *J* = 9.5 Hz, 2H), 1.67 (d, *J* = 6.8 Hz, 3H), 1.65 (s, 9H), 1.00 (s, 9H);  $^{13}C$  NMR (300 MHz,  $CDCl_3$ )  $\delta$  175.9, 172.0, 153.3, 149.3, 135.6, 130.9, 129.0, 125.0, 124.5, 119.6, 114.9, 114.4, 83.8, 82.3, 56.0, 52.9, 43.9, 29.6, 28.1, 27.2, 12.2; LRMS(ESI) *m/z* (relative intensity) 495.1 (30%,  $M+Na^+$ ); HRMS (ESI) *m/z* calcd for  $[C_{25}H_{32}N_2O_7Na]^+$ : 495.2107, found 495.2111. Minor product: mp 96-98 °C;  $[\alpha]_D^{20}$  +216° (*c* 0.33,  $CHCl_3$ ); IR (film) 1737, 1700  $cm^{-1}$ ;  $^1H$  NMR (300 MHz,  $CDCl_3$ )  $\delta$  8.21 (d, *J* = 8.2 Hz, 1H), 7.50 (s, 1H),

7.27 (t,  $J = 7.9$  Hz, 1H), 7.07 (d,  $J = 7.2$  Hz, 1H), 4.74 (br d,  $J \sim 8.7$  Hz, 1H), 4.54 (br q,  $J \sim 5.6$  Hz, 1H), 3.82 (s, 3H), 3.32 (dd,  $J = 15.4, 4.5$  Hz, 1H), 3.06 (dd,  $J = 14.7, 12.5$  Hz, 1H), 1.66 (s, 9H), 1.50 (d,  $J = 7.3$  Hz, 3H), 1.16 (s, 9H);  $^{13}\text{C}$  NMR (300 MHz,  $\text{CDCl}_3$ )  $\delta$  183.5, 170.9, 151.5, 149.1, 137.5, 135.4, 126.8, 125.7, 125.6, 124.3, 115.4, 114.3, 83.8, 83.2, 56.8, 52.6, 49.5, 28.2, 27.9, 27.6, 21.4; LRMS(ESI)  $m/z$  (relative intensity) 495.1 (72%,  $\text{M}+\text{Na}^+$ ); HRMS (ESI)  $m/z$  calcd for  $[\text{C}_{25}\text{H}_{32}\text{N}_2\text{O}_7\text{Na}]^+$ : 495.2107, found 495.2101.

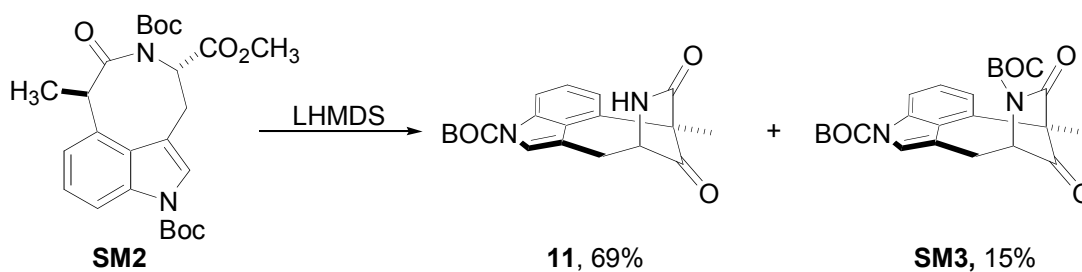

**Oxo-amide 11** and **oxo-imide SM3**. To an ice-cooled solution of *trans*-**SM2** (339 mg, 0.72 mmol) in THF (10 mL) was added slowly a 1 M lithium hexamethyldisilazide (LHMDS) solution in THF (800  $\mu\text{L}$ , 0.80 mmol). The reaction mixture was stirred at room temperature for 15 h. The resulting yellow solution was poured into a 1 M aq.  $\text{H}_3\text{PO}_4$  solution (10 mL) and extracted with ether (3 x 20 mL). The combined organic extracts were dried over anhydrous  $\text{Na}_2\text{SO}_4$  and concentrated under reduced pressure. The crude residue was purified by flash chromatography on silica gel (3:2 hexanes/ether and 1:4 hexanes/EtOAc, respectively) to afford the bridging amide **11** as a white solid (169 mg, 69%) and its *N*-protected analogue **SM3** as a light yellow solid (46 mg, 15%). **Oxo-amide 11**. mp 206-208  $^{\circ}\text{C}$ ;  $[\alpha]_{\text{D}}^{20} +24^{\circ}$  ( $c$  0.52,  $\text{CHCl}_3$ ); IR (film) 3241, 1774, 1733, 1704  $\text{cm}^{-1}$ ;  $^1\text{H}$  NMR (300 MHz,  $\text{CDCl}_3$ )  $\delta$  8.17 (d,  $J = 8.2$  Hz, 1H), 7.48 (s, 1H), 7.46 (br s, 1H), 7.34 (t,  $J = 8.0$  Hz, 1H), 7.24 (dd,  $J = 7.7, 0.9$  Hz, 1H), 4.46 (ddd,  $J = 4.1, 3.0, 1.3$  Hz, 1H), 3.27 (ddd,  $J = 17.0, 4.0, 1.0$  Hz, 1H), 3.13 (ddd,  $J = 17.0,$

2.9, 2.0 Hz, 1H), 1.73 (s, 3H), 1.62 (s, 9H);  $^{13}\text{C}$  NMR (300 MHz,  $\text{CDCl}_3$ )  $\delta$  209.8, 175.1, 149.0, 135.8, 128.8, 126.5, 124.9, 124.7, 118.9, 115.3, 113.8, 84.1, 60.9, 56.2, 29.3, 28.1, 12.8; LRMS(ESI)  $m/z$  (relative intensity) 363.1 (68%,  $\text{M}+\text{Na}^+$ ); HRMS (ESI)  $m/z$  calcd for  $[\text{C}_{19}\text{H}_{20}\text{N}_2\text{O}_4\text{Na}]^+$ : 363.1321, found 363.1317. **Oxo-imide SM3.** mp 122-124  $^\circ\text{C}$ ;  $[\alpha]_D^{20} +10^\circ$  ( $c$  1.00,  $\text{CHCl}_3$ ); IR (film) 1799, 1764, 1742  $\text{cm}^{-1}$ ;  $^1\text{H}$  NMR (300 MHz,  $\text{CDCl}_3$ )  $\delta$  8.20 (d,  $J = 8.2$  Hz, 1H), 7.55 (s, 1H), 7.35 (t,  $J = 8.0$  Hz, 1H), 7.25 (dd,  $J = 7.6$ , 0.9 Hz, 1H), 4.89 (dd,  $J = 4.2$ , 2.9 Hz, 1H), 3.70 (ddd,  $J = 17.1$ , 4.3, 0.9 Hz, 1H), 3.16 (ddd,  $J = 17.1$ , 2.8, 2.0 Hz, 1H), 1.78 (s, 3H), 1.65 (s, 9H), 1.52 (s, 9H);  $^{13}\text{C}$  NMR (300 MHz,  $\text{CDCl}_3$ )  $\delta$  207.6, 170.6, 149.3, 149.0, 135.8, 127.6, 126.3, 124.9, 124.7, 118.8, 115.5, 113.2, 84.4, 84.2, 64.8, 59.1, 28.1, 27.9, 26.9, 13.4; LRMS(ESI)  $m/z$  (relative intensity) 463.2 (65%,  $\text{M}+\text{Na}^+$ ); HRMS (ESI)  $m/z$  calcd for  $[\text{C}_{24}\text{H}_{28}\text{N}_2\text{O}_6\text{Na}]^+$ : 463.1845, found 463.1841.

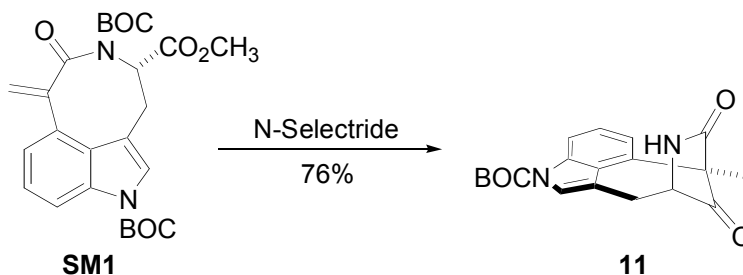

**Oxo-amide 11.** A solution of indole **SM1** (604 mg, 1.28 mmol) in THF (15 mL) was cooled to -78 °C and a 1 M solution *N*-selectride in THF (1.42 mL, 1.42 mmol) was added slowly. The reaction mixture was stirred at -78 °C for 1 h and then at room temperature for 4 h. The resulting red solution was poured into ice water (15 mL) and extracted with EtOAc (3 x 25 mL). The combined organic extracts were dried over anhydrous Na<sub>2</sub>SO<sub>4</sub> and concentrated under reduced pressure. The crude residue was



purified by flash chromatography on silica gel (1:3 hexanes/EtOAc and 100% EtOAc, respectively) to afford the bridging amide **11** as a light yellow solid (333 mg, 76%).

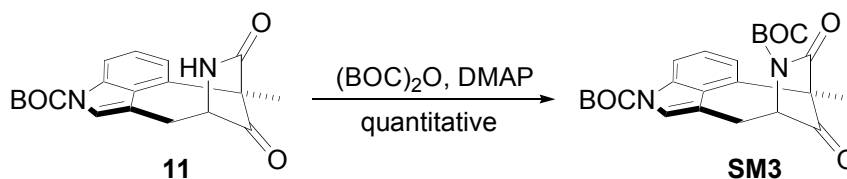

**Oxo-imide SM3.** A solution of di-*tert*-butyldicarbonate (1.92 g, 8.80 mmol) in CH<sub>3</sub>CN (20 mL) was cannulated into a suspension of amide **11** (1.49 g, 4.38 mmol) and 4-dimethylaminopyridine (54 mg, 0.44 mmol) in CH<sub>3</sub>CN (20 mL). After the addition was complete, the indole **11** slowly became soluble and it all went into solution in less than 10 min. The reaction mixture was stirred at room temperature for 1 h. The resulting slightly yellow solution was poured into ice water (30 mL) and extracted with ether (3 x 30 mL). The organic extracts were combined, washed with brine solution (30 mL), dried over anhydrous Na<sub>2</sub>SO<sub>4</sub>, and concentrated under reduced pressure. The crude residue was purified by flash chromatography on silica gel (3:2 hexanes/ether) to afford the desired protected product as a white solid (2.09 g, quantitative).

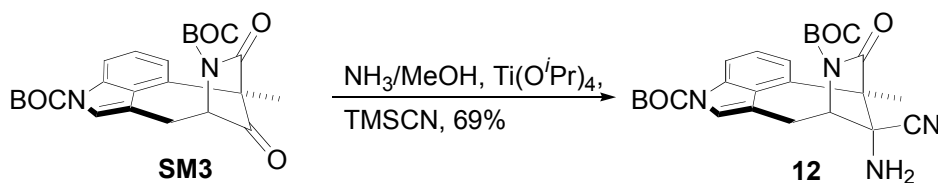

**Cyanoamine 12.** To a suspension of amide **SM3** (1.00 g, 2.28 mmol) in MeOH (23 mL) was added saturated NH<sub>3</sub>/MeOH (3.4 mL) followed by titanium isopropoxide (810 μL, 2.74 mmol). The reaction mixture was stirred at room temperature for 1 h, and then trimethylsilylcyanide (1.20 mL, 9.00 mmol) was added. The reaction mixture was stirred for an additional 4 h. The resulting yellow solution was poured into ice water (25 mL) and extracted with CH<sub>2</sub>Cl<sub>2</sub> (3 x 75 mL). The combined organic extracts were dried

over anhydrous Na<sub>2</sub>SO<sub>4</sub> and concentrated under reduced pressure. The crude residue was purified by flash chromatography on silica gel (1:2 hexanes/ether) to afford the cyanoamine **12** as a white solid (736 mg, 69%). mp 154-156 °C; [ $\alpha$ ]<sub>D</sub><sup>20</sup> +56° (*c* 0.80, CHCl<sub>3</sub>); IR (film) 3381, 3320, 2254, 1785, 1736 cm<sup>-1</sup>; <sup>1</sup>H NMR (300 MHz, CDCl<sub>3</sub>)  $\delta$  8.22 (dd, *J* = 6.4, 2.6 Hz, 1H), 7.53 (s, 1H), 7.38-7.31 (m, 2H), 4.96 (dd, *J* = 3.7, 3.0 Hz, 1H), 3.69 (ddd, *J* = 17.8, 3.9, 0.9 Hz, 1H), 3.24 (ddd, *J* = 17.8, 2.6, 2.1 Hz, 1H), 2.05 (s, 3H), 1.74 (s, 2H), 1.65 (s, 9H), 1.52 (s, 9H); <sup>13</sup>C NMR (300 MHz, CDCl<sub>3</sub>)  $\delta$  170.8, 149.4, 149.0, 135.6, 127.6, 127.1, 125.0, 124.8, 122.3, 121.6, 116.2, 113.9, 84.4, 84.2, 62.9, 60.5, 56.7, 28.2, 27.9, 25.1, 18.9; LRMS(ESI) *m/z* (relative intensity) 489.1 (88%, M+Na<sup>+</sup>); HRMS (ESI) *m/z* calcd for [C<sub>25</sub>H<sub>30</sub>N<sub>4</sub>O<sub>5</sub>Na]<sup>+</sup>: 489.2114, found 489.2110.

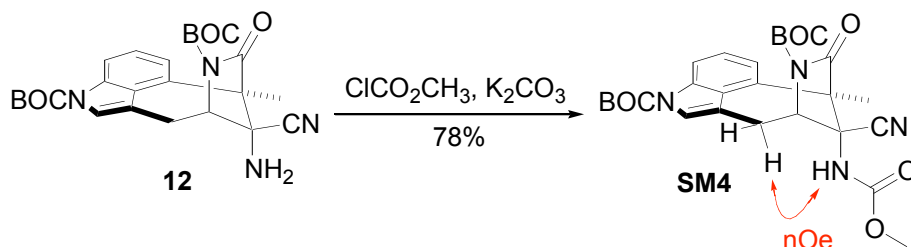

**N-Moc Cyanoamine SM4.** To a mixture of cyanoamine **12** (602 mg, 1.29 mmol) and K<sub>2</sub>CO<sub>3</sub> (357 mg, 2.58 mmol) was added THF (13 mL) followed by methylchloroformate (220  $\mu$ L, 2.61 mmol). The reaction mixture was heated to reflux for 20 h. The resulting yellow solution was allowed to cool to room temperature, poured into ice water (15 mL), and extracted with CH<sub>2</sub>Cl<sub>2</sub> (3 x 15 mL). The combined organic layers were dried over anhydrous Na<sub>2</sub>SO<sub>4</sub> and concentrated under reduced pressure. The crude residue was purified by flash chromatography on silica gel (1:2 hexanes/ether) to afford the desired protected amine as a white solid (527 mg, 78%). mp 164-166 °C; [ $\alpha$ ]<sub>D</sub><sup>20</sup> +43° (*c* 0.76, CHCl<sub>3</sub>); IR (film) 3301, 2256, 1790, 1732 cm<sup>-1</sup>; <sup>1</sup>H NMR (400 MHz,

CDCl<sub>3</sub>)  $\delta$  8.24 (app.t,  $J$  = 4.3 Hz, 1H), 7.51 (s, 1H), 7.38-7.28 (m, 2H), 5.38 (br s, 1H), 5.19 (br s, 1H), 3.65 (d,  $J$  = 18.8 Hz, 1H), 3.60 (s, 3H), 2.98 (d,  $J$  = 17.9 Hz, 1H), 2.08 (s, 3H), 1.65 (s, 9H), 1.49 (s, 9H); <sup>13</sup>C NMR (300 MHz, CDCl<sub>3</sub>)  $\delta$  169.2, 155.1, 148.8, 148.7, 135.5, 127.4, 125.5, 124.8, 124.6, 122.5, 118.0, 116.6, 113.8, 84.3, 84.1, 61.9, 60.4, 55.4, 52.8, 27.8, 27.6, 24.9, 19.1; LRMS(ESI)  $m/z$  (relative intensity) 547.2 (60%, M+Na<sup>+</sup>); HRMS (ESI)  $m/z$  calcd for [C<sub>27</sub>H<sub>32</sub>N<sub>4</sub>O<sub>7</sub>Na]<sup>+</sup>: 547.2169, found 547.2165.

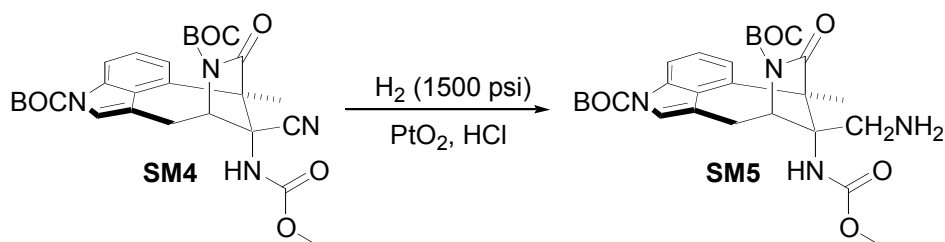

***N*-Moc Diamine **SM5**.** To a solution of cyanoamine **SM4** (669 mg, 1.28 mmol) in a 1:1 mixture of MeOH and EtOH (40 mL) was added PtO<sub>2</sub> (145 mg, 0.64 mmol) followed by a 10% solution of HCl in MeOH (1.05 mL, 1.27 mmol). The reaction mixture was placed in a sealable metal container equipped with a gas inlet and pressure gauge and pressurized with H<sub>2</sub> at 1500 psi for 17 h. The resulting clear and colorless solution with settled black particles was filtered through a Celite pad and the filtrate was poured into ice water (20 mL) and extracted with CH<sub>2</sub>Cl<sub>2</sub> (3 x 30 mL). The combined organic layers were dried over anhydrous Na<sub>2</sub>SO<sub>4</sub> and concentrated under reduced pressure to give the crude residue as a white solid (674 mg). The crude residue was carried on to the next step without purification. IR (film) 3401, 1782, 1731 cm<sup>-1</sup>; <sup>1</sup>H NMR (300 MHz, CDCl<sub>3</sub>)  $\delta$  8.20 (d,  $J$  = 7.9 Hz, 1H), 7.47 (s, 1H), 7.34-7.27 (m, 2H), 4.83 (br s, 1H), 4.77 (s, 1H), 3.76 (d,  $J$  = 13.7 Hz, 1H), 3.61 (dd,  $J$  = 18.1, 3.3 Hz, 1H), 3.48 (s, 3H), 3.24 (d,  $J$  = 13.7 Hz, 1H), 3.03 (d,  $J$  = 17.9 Hz, 1H), 1.81 (s, 3H), 1.65 (s, 9H), 1.49 (s, 9H), 1.32 (br s, 2H); <sup>13</sup>C NMR (300 MHz, CDCl<sub>3</sub>)  $\delta$  172.6, 155.9, 149.7, 149.0, 135.6,

129.4, 128.2, 124.3, 124.1, 121.9, 115.7, 115.6, 83.7, 83.2, 62.7, 61.2, 56.9, 51.9, 46.2, 27.9, 27.8, 25.8, 16.2; LRMS(ESI)  $m/z$  (relative intensity) 529.2 (72%,  $M+H^+$ ); HRMS (ESI)  $m/z$  calcd for  $[C_{27}H_{37}N_4O_7]^+$ : 529.2662, found 529.2656.

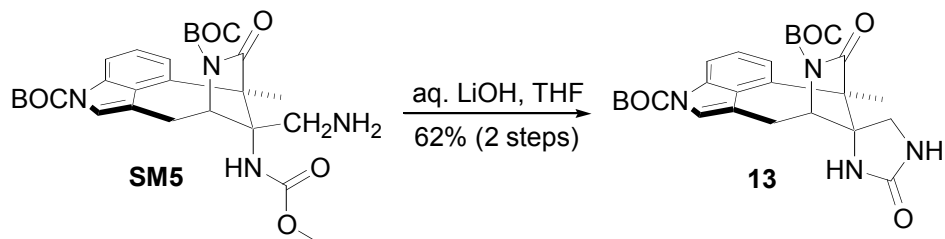

**Cyclic Urea 13.** To a solution of amine **SM5** (674 mg, 1.28 mmol) in THF (25 mL) was added a deoxygenated 1 M aq. LiOH solution (5.1 mL, 5.1 mmol). The reaction mixture was heated to reflux for 17 h. The resulting slightly yellow solution was allowed to cool to room temperature and then poured into ice water and extracted with  $CH_2Cl_2$  (3 x 30 mL). The combined organic layers were dried over anhydrous  $Na_2SO_4$  and concentrated under reduced pressure to give a yellow solid (600 mg). Cold ether (10 mL) was added to the resulting yellow solid to dissolve impurities and the desired cyclic urea was collected by filtration (394 mg, 62% over 2 steps). mp 248 °C (dec.);  $[\alpha]_D^{20} +88^\circ$  ( $c$  1.00, DMSO); IR (film) 3344, 1782, 1730, 1687  $cm^{-1}$ ;  $^1H$  NMR (300 MHz, DMSO- $d_6$ )  $\delta$  8.45 (s, 1H), 8.08 (d,  $J = 8.2$  Hz, 1H), 7.82 (s, 1H), 7.73 (s, 1H), 7.58 (d,  $J = 7.9$ , 1H), 7.30 (t,  $J = 8.1$  Hz, 1H), 4.27 (dd,  $J = 12.4, 3.1$  Hz, 1H), 3.83 (dd,  $J = 16.1, 2.9$  Hz, 1H), 3.60 (d,  $J = 10.4$  Hz, 1H), 3.34 (s, 3H), 3.21 (d,  $J = 8.9$  Hz, 1H), 2.86 (t,  $J = 13.5$  Hz, 1H), 1.60 (s, 9H), 1.46 (s, 9H), 1.43 (s, 3H);  $^{13}C$  NMR (300 MHz, DMSO- $d_6$ )  $\delta$  175.6, 153.7, 150.9, 148.7, 135.4, 132.5, 127.4, 124.4, 124.2, 123.8, 114.3, 113.6, 83.8, 81.7, 65.9, 55.1, 53.7, 48.6, 27.8, 27.7, 26.4, 19.4; LRMS(ESI)  $m/z$  (relative intensity) 519.2 (52%,  $M+Na^+$ ); HRMS (ESI)  $m/z$  calcd for  $[C_{26}H_{32}N_4O_6Na]^+$ : 519.2220, found 519.2227.

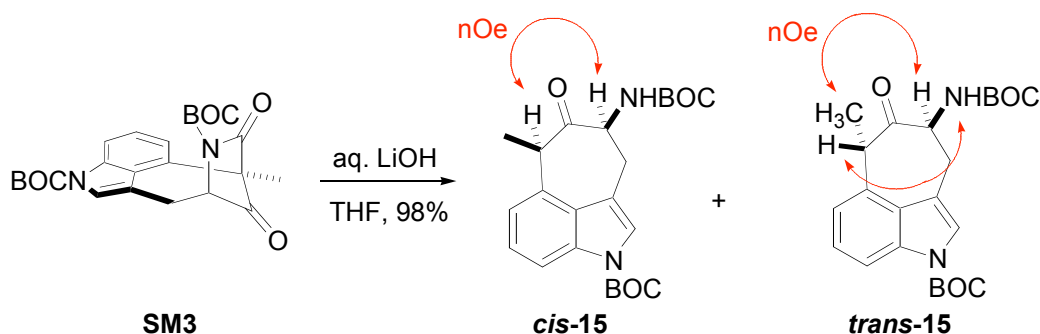

***tert*-Butyl 8-*tert*-Butoxycarbonylamino-6-methyl-7-oxo-6,7,8,9-tetrahydro-2-aza benzo[*cd*]azulene-2 Carboxylate (**15**).** To an ice-cooled solution of amide **SM3** (1.029 g, 2.34 mmol) in THF (47 mL) was added a deoxygenated 1 M aq. LiOH solution (4.7 mL, 4.7 mmol). The reaction mixture was stirred in an ice bath for 1 h and then at room temperature for 14 h. The resulting slightly yellow solution was poured into ice water (30 mL) and extracted with ether (3 x 40 mL). The combined organic extracts were dried over anhydrous Na<sub>2</sub>SO<sub>4</sub> and concentrated under reduced pressure. The crude residue was purified by flash chromatography on silica gel (3:2 hexanes/ether) to afford a ~ 2:1 diastereomeric mixture of ketones **15** as a white solid (951 mg, 98%). Major product (*cis*-**15**): mp 163-164 °C; [ $\alpha$ ]<sub>D</sub><sup>20</sup> +29° (*c* 1.00, CHCl<sub>3</sub>); IR (film) 3416, 1729 cm<sup>-1</sup>; <sup>1</sup>H NMR (300 MHz, CDCl<sub>3</sub>)  $\delta$  7.99 (d, *J* = 8.1 Hz, 1H), 7.43 (s, 1H), 7.26 (t, *J* = 7.9 Hz, 1H), 7.01 (d, *J* = 7.5 Hz, 1H), 5.42 (br s, 1 H), 4.74 (br dd, *J* ~ 9.2, 4.6 Hz, 1H), 4.62 (q, *J* = 6.8 Hz, 1H), 3.60 (dd, *J* = 15.7, 4.6 Hz, 1H), 3.17 (dd, *J* = 15.8, 4.2 Hz, 1H), 1.65 (s, 9H), 1.65 (d, *J* = 6.9 Hz, 3H), 1.45 (s, 9H); <sup>13</sup>C NMR (300 MHz, CDCl<sub>3</sub>)  $\delta$  206.1, 155.5, 149.2, 135.1, 130.7, 128.3, 125.0, 123.0, 118.7, 116.1, 114.1, 83.5, 79.5, 61.4, 45.7, 28.2, 28.0, 27.6, 14.4; LRMS(ESI) *m/z* (relative intensity) 437.2 (100%, M+Na<sup>+</sup>); HRMS (ESI) *m/z* calcd for [C<sub>23</sub>H<sub>30</sub>N<sub>2</sub>O<sub>5</sub>Na]<sup>+</sup>: 437.2052, found 457.2042. Anal. Calcd for C<sub>23</sub>H<sub>30</sub>N<sub>2</sub>O<sub>5</sub>: C, 66.65; H, 7.30; N, 6.76. Found: C, 66.59; H, 7.32; N, 6.76. Minor product (*trans*-**15**):

mp 170-171 °C;  $[\alpha]_D^{20} +90^\circ$  ( $c$  1.00,  $\text{CHCl}_3$ ); IR (film) 3385, 1720  $\text{cm}^{-1}$ ;  $^1\text{H}$  NMR (400 MHz,  $\text{CDCl}_3$ )  $\delta$  8.06 (d,  $J$  = 8.1 Hz, 1H), 7.48 (s, 1H), 7.30 (t,  $J$  = 7.9 Hz, 1H), 7.08 (d,  $J$  = 7.6 Hz, 1H), 5.52 (br s, 1 H), 4.50 (q,  $J$  = 7.0 Hz, 1H), 4.43 (br dd,  $J$  ~ 11.9, 5.7 Hz, 1H), 3.29 (dd,  $J$  = 14.7, 2.7 Hz, 1H), 3.19 (ddd,  $J$  = 15.2, 10.2, 1.4 Hz, 1H), 1.66 (s, 9H), 1.64 (d,  $J$  = 7.0 Hz, 3H), 1.45 (s, 9H);  $^{13}\text{C}$  NMR (300 MHz,  $\text{CDCl}_3$ )  $\delta$  208.8, 155.4, 149.4, 135.6, 130.7, 128.0, 124.9, 123.1, 120.4, 116.1, 113.9, 83.7, 80.0, 58.9, 49.0, 29.3, 28.3, 28.1, 16.4; LRMS(ESI)  $m/z$  (relative intensity) 437.2 (100%,  $\text{M}+\text{Na}^+$ ); HRMS (ESI)  $m/z$  calcd for  $[\text{C}_{23}\text{H}_{30}\text{N}_2\text{O}_5\text{Na}]^+$ : 437.2052, found 437.2060.

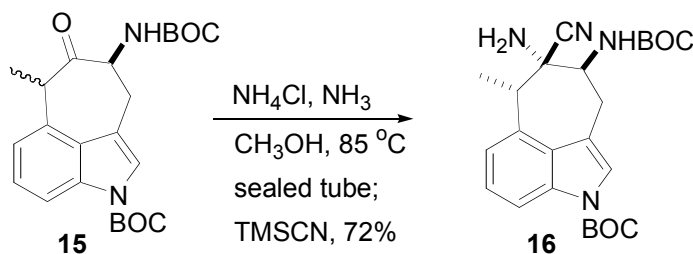

**(±)-*tert*-Butyl 7-Amino-8-*tert*-butoxycarbonylamino-7-cyano-6-methyl-6,7,8,9- tetrahydro-2-aza-benzo[*cd*]azulene-2 Carboxylate (16).** A solution of the diastereomeric mixture of ketones **15** (645 mg, 1.56 mmol) and  $\text{NH}_4\text{Cl}$  (166 mg, 3.10 mmol) in saturated  $\text{NH}_3/\text{MeOH}$  (15 mL) in a sealed tube was heated to 85 °C for 4 h. The reaction mixture was allowed to cool to room temperature and trimethylsilylcyanide (830  $\mu\text{L}$ , 6.22 mmol) was added. The reaction mixture was stirred in a sealed tube at room temperature for 14 h. The resulting yellow suspension was diluted with  $\text{CH}_2\text{Cl}_2$  (25 mL) and then poured into ice water (20 mL). The organic layer was separated and the aqueous layer was extracted with  $\text{CH}_2\text{Cl}_2$  (2 x 25 mL). The combined organic layers were dried over anhydrous  $\text{Na}_2\text{SO}_4$  and concentrated under reduced pressure. The crude residue was purified by flash chromatography on silica gel (2:1 hexanes/EtOAc and

100% EtOAc, respectively) to afford the cyanoamine **16** as a light yellow solid (494 mg, 72%). mp 152-154 °C;  $[\alpha]_D^{20}$  -0.8° (*c* 1.00, CHCl<sub>3</sub>); IR (film) 3326, 2252, 1727 cm<sup>-1</sup>; <sup>1</sup>H NMR (300 MHz, CDCl<sub>3</sub>) δ 8.00 (d, *J* = 8.0 Hz, 1H), 7.40 (s, 1H), 7.27 (t, *J* = 7.9 Hz, 1H), 7.06 (d, *J* = 7.4 Hz, 1H), 5.16 (br d, *J* = 9.9, 1H), 4.0 (td, *J* = 9.8, 2.8 Hz, 1H), 3.70 (q, *J* = 7.1 Hz, 1H), 3.24 (dd, *J* = 15.5, 9.5 Hz, 1H), 3.05 (dd, *J* = 15.7, 2.4 Hz, 1H), 2.05 (br s, 2H), 1.66 (s, 9H), 1.62 (d, *J* = 7.2 Hz, 3H), 1.45 (s, 9H); <sup>13</sup>C NMR (300 MHz, CDCl<sub>3</sub>) δ 155.7, 149.5, 135.4, 132.0, 129.1, 124.9, 122.7, 122.3, 121.8, 116.7, 114.5, 83.7, 80.7, 65.2, 57.6, 43.6, 30.4, 28.3, 28.2, 15.6; LRMS(ESI) *m/z* (relative intensity) 441.2 (35%, M+H<sup>+</sup>); HRMS (ESI) *m/z* calcd for [C<sub>24</sub>H<sub>33</sub>N<sub>4</sub>O<sub>4</sub>]<sup>+</sup>: 441.2502, found 441.2497.

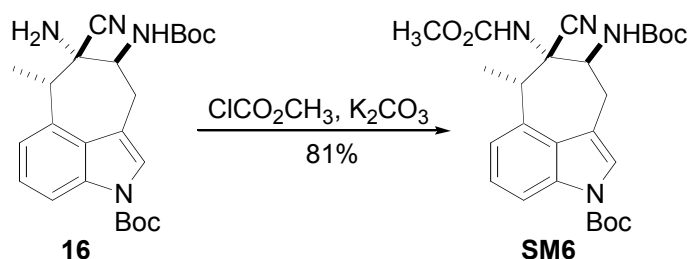

**(±)-tert-Butyl 8-tert-Butoxycarbonylamino-7-cyano-7-methoxycarbonylamino-6-methyl-6,7,8,9-tetrahydro-2-aza-benzo[cd]azulene-2 Carboxylate (SM6).** To a mixture of cyanoamine **16** (84 mg, 0.19 mmol) and K<sub>2</sub>CO<sub>3</sub> (53 mg, 0.38 mmol) was added THF (4 mL) followed by methylchloroformate (100 μL, 1.19 mmol). The reaction mixture was heated to reflux and held there for 20 h. The resulting yellow solution was allowed to cool to room temperature, poured into ice water (10 mL), and extracted with CH<sub>2</sub>Cl<sub>2</sub> (3 x 10 mL). The combined organic layers were dried over anhydrous Na<sub>2</sub>SO<sub>4</sub> and concentrated under reduced pressure. The crude residue was purified by flash chromatography on silica gel (1:2 ether/hexanes) to afford the desired product **SM6** as a

white solid (77 mg, 81%). mp 138-140 °C;  $[\alpha]_D^{20} +0.2^\circ$  ( $c$  1.00,  $\text{CHCl}_3$ ); IR (film) 3328, 2254, 1731, 1689  $\text{cm}^{-1}$ ;  $^1\text{H}$  NMR (300 MHz,  $\text{CDCl}_3$ )  $\delta$  8.02 (d,  $J$  = 8.0 Hz, 1H), 7.42 (s, 1H), 7.27 (t,  $J$  = 7.9 Hz, 1H), 7.10 (d,  $J$  = 7.3 Hz, 1H), 6.50 (br s, 1H), 5.40 (br d,  $J$  = 9.1, 1H), 4.43 (td,  $J$  = 8.5, 5.5 Hz, 1H), 4.42 (q,  $J$  = 7.3 Hz, 1H), 3.73 (s, 3H), 3.42 (dd,  $J$  = 16.9, 5.1 Hz, 1H), 3.16 (dd,  $J$  = 17.1, 7.8 Hz, 1H), 1.65 (s, 9H), 1.47 (s, 9H), 1.44 (d,  $J$  = 7.4, 3H);  $^{13}\text{C}$  NMR (300 MHz,  $\text{CDCl}_3$ )  $\delta$  156.8, 155.1, 149.3, 135.6, 133.1, 127.9, 124.9, 123.2, 123.1, 117.4, 114.4, 114.1, 83.7, 81.4, 65.0, 53.0, 52.4, 43.7, 30.4, 28.08, 28.06, 17.5; LRMS(ESI)  $m/z$  (relative intensity) 521.2 (100%,  $\text{M}+\text{Na}^+$ ); HRMS (ESI)  $m/z$  calcd for  $[\text{C}_{26}\text{H}_{34}\text{N}_4\text{O}_6\text{Na}]^+$ : 521.2376, found 521.2361. Anal. Calcd for  $\text{C}_{26}\text{H}_{34}\text{N}_4\text{O}_6$ : C, 62.63; H, 6.87; N, 11.24. Found: C, 62.37; H, 6.97; N, 10.99.

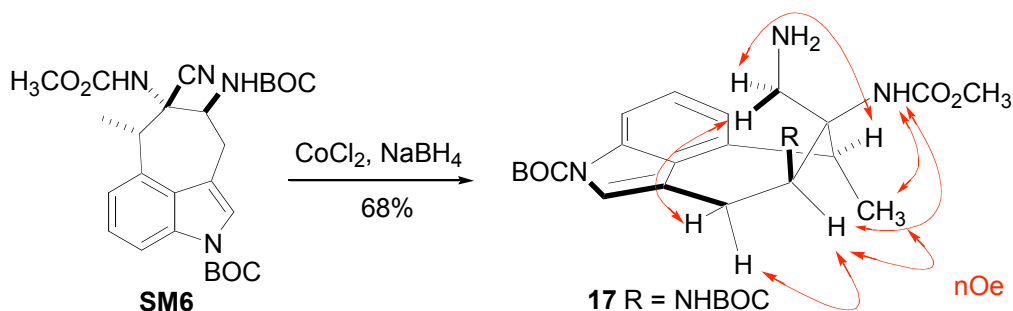

**(±)-*tert*-Butyl 7-Aminomethyl-8-*tert*-butoxycarbonylamino-7-methoxycarbonylamino-6-methyl-6,7,8,9-tetrahydro-2-aza-benzo[*cd*]azulene-2 Carboxylate (17).**

To a solution of cyanoamine **SM6** (358 mg, 0.72 mmol) in MeOH (30 mL) was added cobalt (II) chloride (2.33 g, 17.9 mmol). The resulting dark blue solution was cooled in an ice bath and sodium borohydride (679 mg, 17.9 mmol) was added in portions. The resulting black suspension was stirred at room temperature for 3 h. It was then recooled in an ice bath and additional sodium borohydride (679 mg, 17.9 mmol) was added in portions. The reaction mixture was stirred at room temperature for 38 h. The resulting black suspension was diluted with MeOH (30 mL) and acidified with 1 M  $\text{H}_3\text{PO}_4$  solution



(30 mL). The acidic solution was stirred vigorously for 1 h until it turned pink and clear. The pink solution was diluted with CH<sub>2</sub>Cl<sub>2</sub> (30 mL) and made alkaline by the addition of saturated NaHCO<sub>3</sub> (30 mL). The resulting purple precipitate was filtered off and washed with CH<sub>2</sub>Cl<sub>2</sub> (30 mL). The organic layer of the filtrate was separated and the aqueous layer was extracted with CH<sub>2</sub>Cl<sub>2</sub> (2 x 30 mL). The combined organic layers were dried over anhydrous Na<sub>2</sub>SO<sub>4</sub> and concentrated under reduced pressure. The crude residue was purified by flash chromatography on silica gel (3:2 hexanes/ether and 100% EtOAc, respectively) to afford the desired amine **17** as a white solid (246 mg, 68%). mp 124-126 °C;  $[\alpha]_D^{20}$  -0.2° (*c* 1.00, CHCl<sub>3</sub>); IR (film) 3325, 1729 cm<sup>-1</sup>; <sup>1</sup>H NMR (300 MHz, C<sub>6</sub>D<sub>6</sub>) δ 8.33 (d, *J* = 7.2 Hz, 1H), 7.23 (s, 1H), 7.11 (t, *J* = 7.8 Hz, 1H), 6.96 (d, *J* = 9.5 Hz, 1H), 6.90 (d, *J* = 6.8 Hz, 1H), 5.78 (s, 1H), 4.73 (td, *J* = 10.7, 4.6 Hz, 1H), 4.30 (q, *J* = 7.1 Hz, 1H), 3.76 (d, *J* = 13.3 Hz, 1H), 3.47 (s, 3H), 3.29 (dd, *J* = 16.9, 4.6 Hz, 1H), 2.78 (ddd, *J* = 16.6, 12.1, 1.7 Hz, 1H), 2.64 (dd, *J* = 13.2 Hz, 1H), 1.52 (s, 9H), 1.39 (s, 9H), 1.24 (d, *J* = 7.2 Hz, 3H), 0.59 (br s, 2H); <sup>13</sup>C NMR (300 MHz, CDCl<sub>3</sub>) δ 156.4, 155.1, 149.5, 136.4, 135.8, 127.1, 124.5, 123.7, 123.0, 115.6, 113.1, 83.5, 79.8, 62.8, 51.7, 51.3, 43.8, 43.2, 30.2, 28.5, 28.2, 20.5; LRMS(ESI) *m/z* (relative intensity) 503.2 (100%, M+H<sup>+</sup>); HRMS (ESI) *m/z* calcd for [C<sub>26</sub>H<sub>39</sub>N<sub>4</sub>O<sub>6</sub>]<sup>+</sup>: 503.2870, found 503.2874.

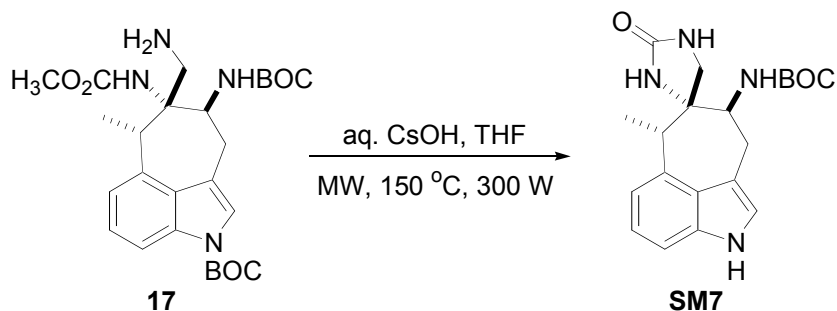

by THF (2 mL). The reaction mixture was heated to 150 °C at 300 W in a microwave reactor for 1 h. The resulting slightly yellow suspension was poured into ice water (10 mL) and extracted with EtOAc (3 x 30 mL). The combined organic layers were dried over anhydrous Na<sub>2</sub>SO<sub>4</sub> and concentrated under reduced pressure to afford a light yellow solid (20 mg, 91% crude). The crude residue was carried on to the next step without purification. IR (film) 3416, 1687 cm<sup>-1</sup>; <sup>1</sup>H NMR (300 MHz, CDCl<sub>3</sub>) δ 8.19 (br s, 1H), 7.23 (dd, *J* = 8.2, 0.9 Hz, 1H), 7.13 (t, *J* = 7.6 Hz, 1H), 7.02 (s, 1H), 6.93 (d, *J* = 7.1 Hz, 1H), 5.42 (br s, 1H), 4.98 (br d, *J* = 8.6 Hz, 1H), 4.58 (m, 1H), 4.43 (br s, 1H), 3.69 (q, *J* = 7.1 Hz, 1H), 3.49-3.21 (m, 2H), 3.19 (d, *J* = 9.7, 1H), 2.84 (dd, *J* = 15.4, 11.7 Hz, 1H), 1.48 (s, 9H), 1.40 (d, *J* = 7.2 Hz, 3H); <sup>13</sup>C NMR (300 MHz, DMSO-d<sub>6</sub>) δ 161.6, 155.9, 136.4, 135.2, 123.3, 122.5, 121.1, 119.1, 109.3, 109.2, 77.9, 65.6, 49.3, 49.1, 44.6, 28.4, 28.2, 19.4; LRMS(ESI) *m/z* (relative intensity) 371.2 (100%, M+H<sup>+</sup>); HRMS (ESI) *m/z* calcd for [C<sub>20</sub>H<sub>26</sub>N<sub>4</sub>O<sub>3</sub>Na]<sup>+</sup>: 393.1903, found 393.1898.

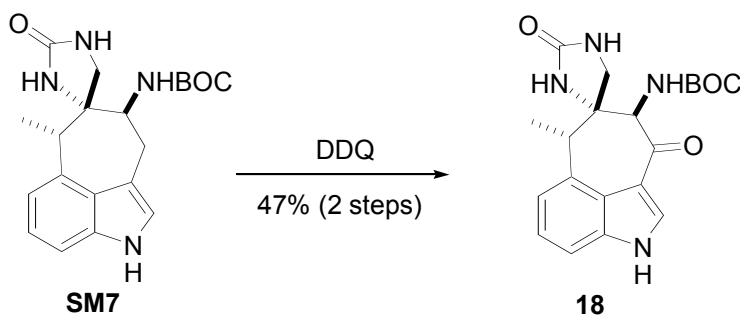

(±)-Cyclic Urea **18**. To an ice-cooled solution of cyclic urea **SM7** (103 mg, 0.28 mmol) in a 10:1 mixture of THF and H<sub>2</sub>O (5.5 mL) was added 2,3-dichloro-5,6-dicyano-1,4-benzoquinone (DDQ) (127 mg, 0.56 mmol). The reaction mixture was stirred in an ice bath for 1 h and then at room temperature for 14 h. The resulting dark yellow solution was concentrated to dryness. CH<sub>2</sub>Cl<sub>2</sub> (10 mL) was added to the dark red solid residue followed by a 0.1 M aq. NaOH solution (10 mL). The precipitate was filtered off

and washed with CH<sub>2</sub>Cl<sub>2</sub> (10 mL). The organic layer of the filtrate was separated and the aqueous layer was extracted with CH<sub>2</sub>Cl<sub>2</sub> (2 x 25 mL). The combined organic layers were dried over anhydrous Na<sub>2</sub>SO<sub>4</sub> and concentrated under reduced pressure. The crude residue was purified by flash chromatography on silica gel (100% EtOAc) to afford the desired product **18** as a yellow solid (55 mg, 47% over steps). mp 276 °C (dec.); IR (film) 3408, 1691, 1634 cm<sup>-1</sup>; <sup>1</sup>H NMR (300 MHz, DMSO-d<sub>6</sub>) δ 12.32 (s, 1H), 8.19 (s, 1H), 7.37 (dd, *J* = 7.2, 0.9 Hz, 1H), 7.20 (t, *J* = 7.6 Hz, 1H), 7.11 (d, *J* = 6.9 Hz, 1H), 6.95 (d, *J* = 8.6 Hz, 1H), 6.44 (s, 1H), 6.02 (s, 1H), 4.89 (d, *J* = 8.6 Hz, 1H), 3.53 (q, *J* = 7.2 Hz, 1H), 3.11 (d, *J* = 8.6 Hz, 1H), 2.76 (d, *J* = 9.1 Hz, 1H), 1.45 (s, 9H), 1.40 (d, *J* = 7.1 Hz, 3H); <sup>13</sup>C NMR (300 MHz, DMSO-d<sub>6</sub>) δ 188.7, 161.5, 156.9, 136.7, 134.7, 133.2, 123.1, 122.6, 121.2, 114.2, 110.7, 78.4, 62.4, 61.4, 49.3, 46.8, 28.4, 19.9; LRMS(ESI) *m/z* (relative intensity) 407.2 (100%, M+Na<sup>+</sup>); HRMS (ESI) *m/z* calcd for [C<sub>20</sub>H<sub>24</sub>N<sub>4</sub>O<sub>4</sub>Na]<sup>+</sup>: 407.1696, found 407.1699.

PNS\_P134\_purified

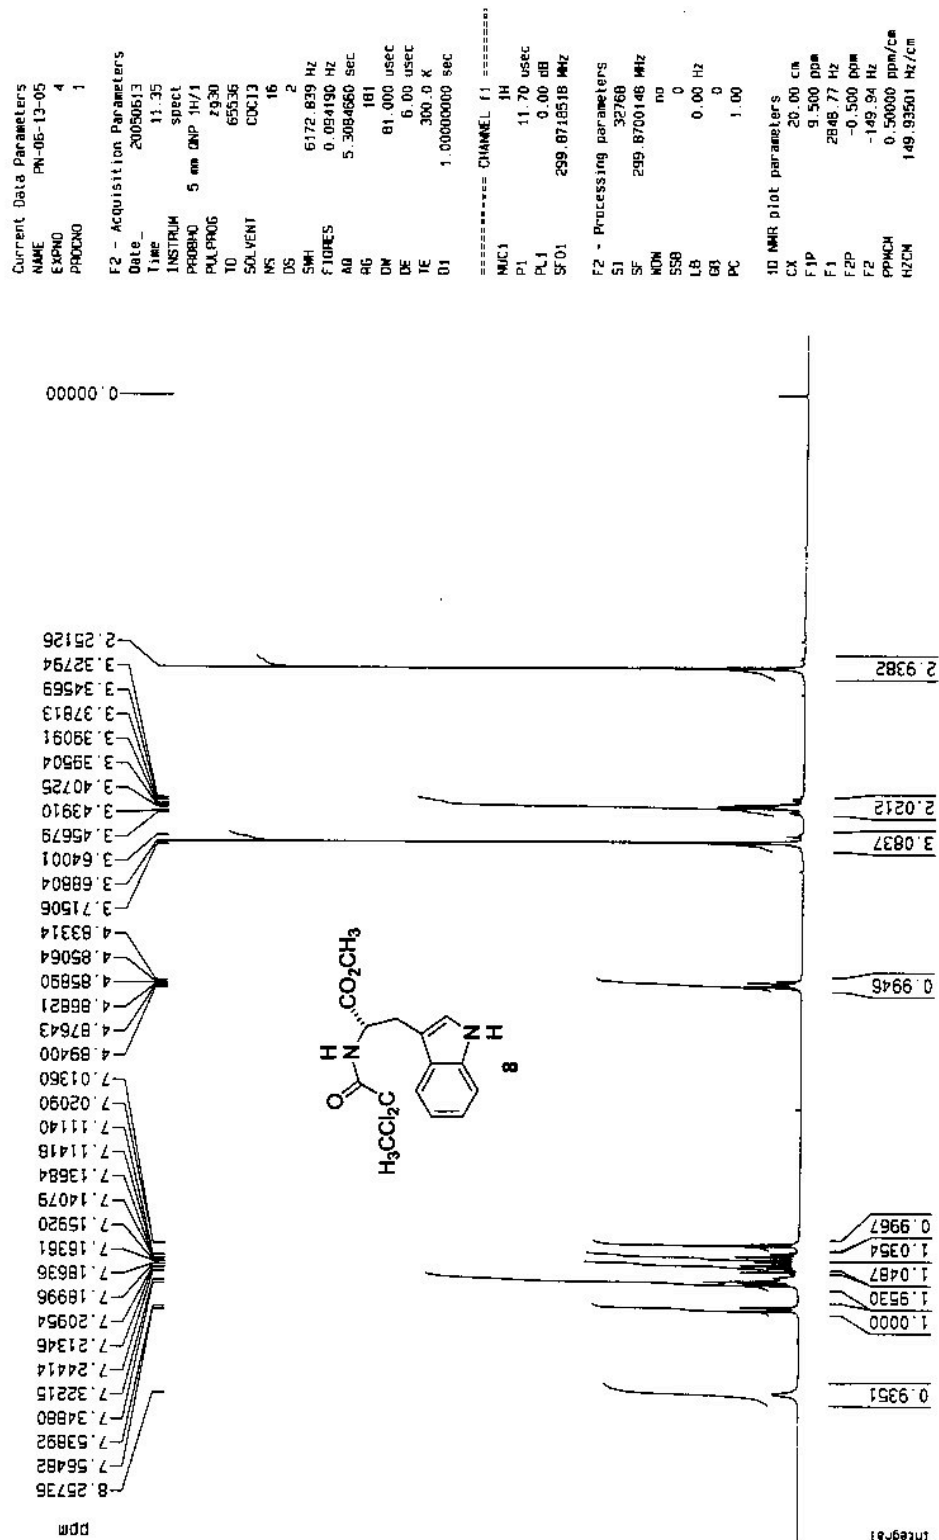

PN5\_P134\_purified

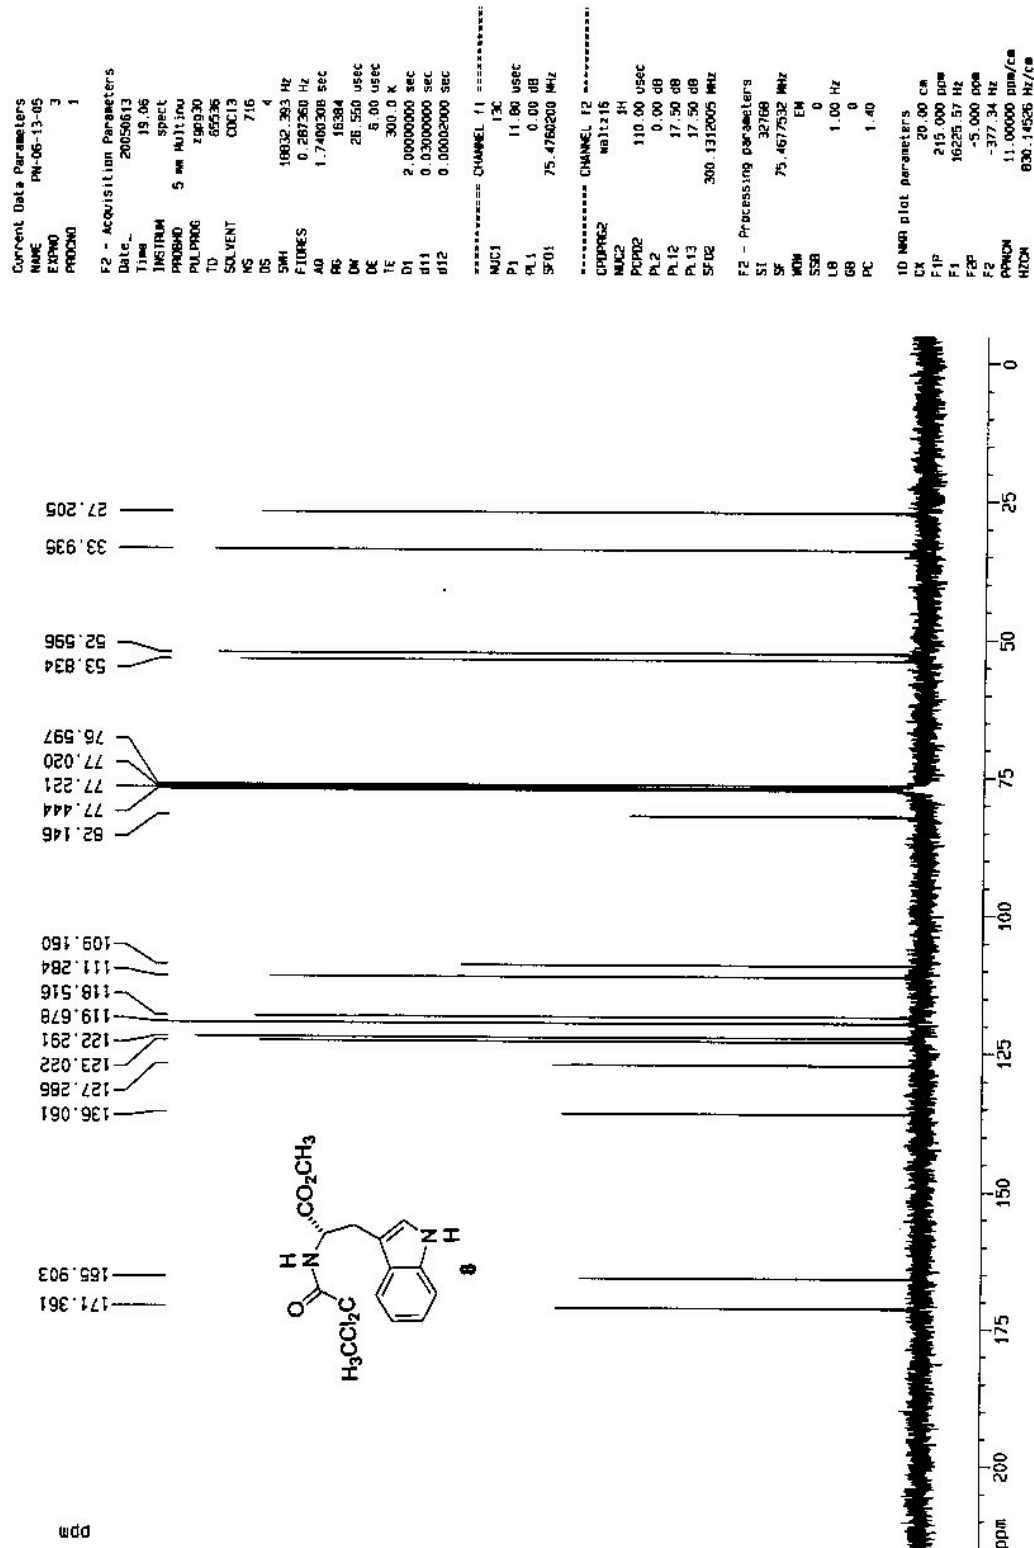

PN5\_P148\_purified

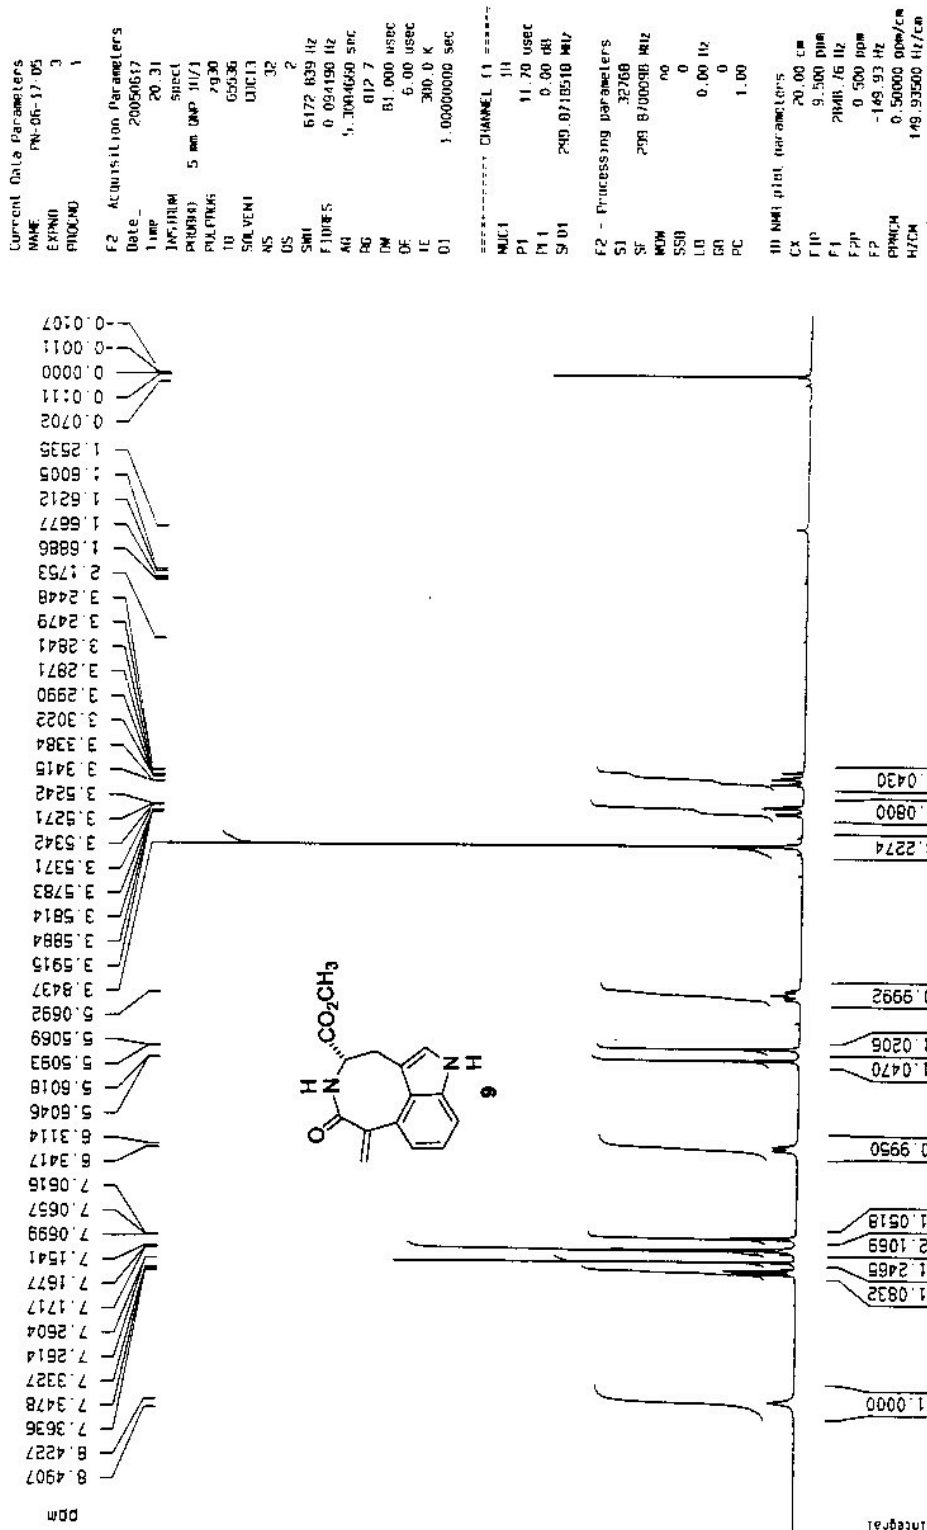

PMS\_P148\_purified

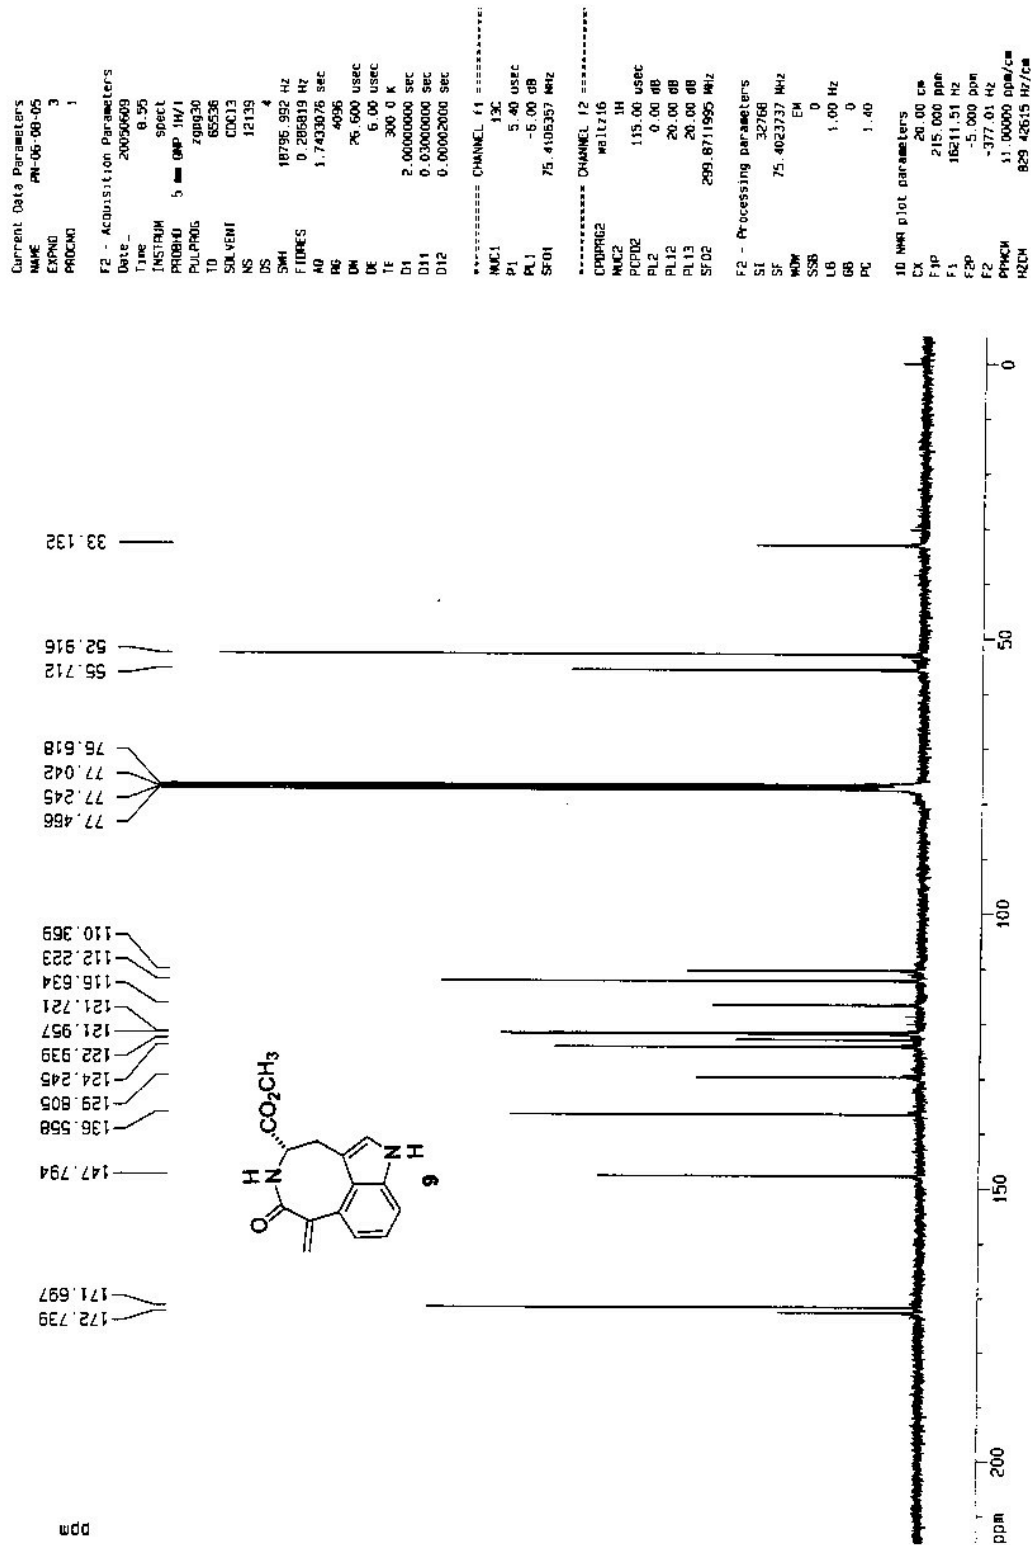

PNS\_P166\_purified

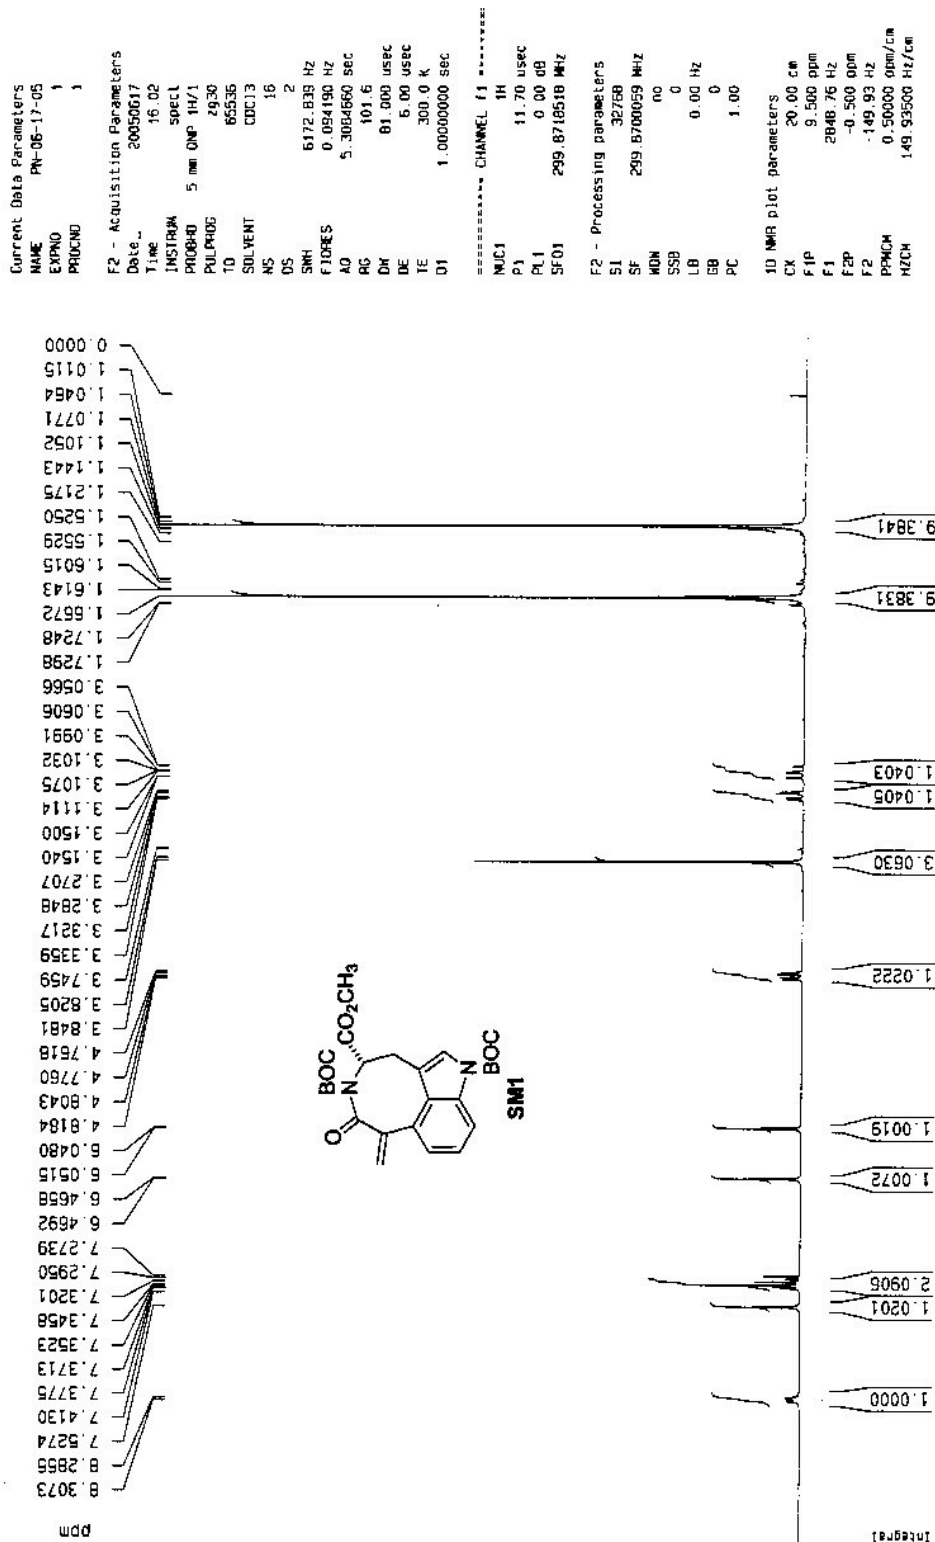



PN5\_P165\_purified

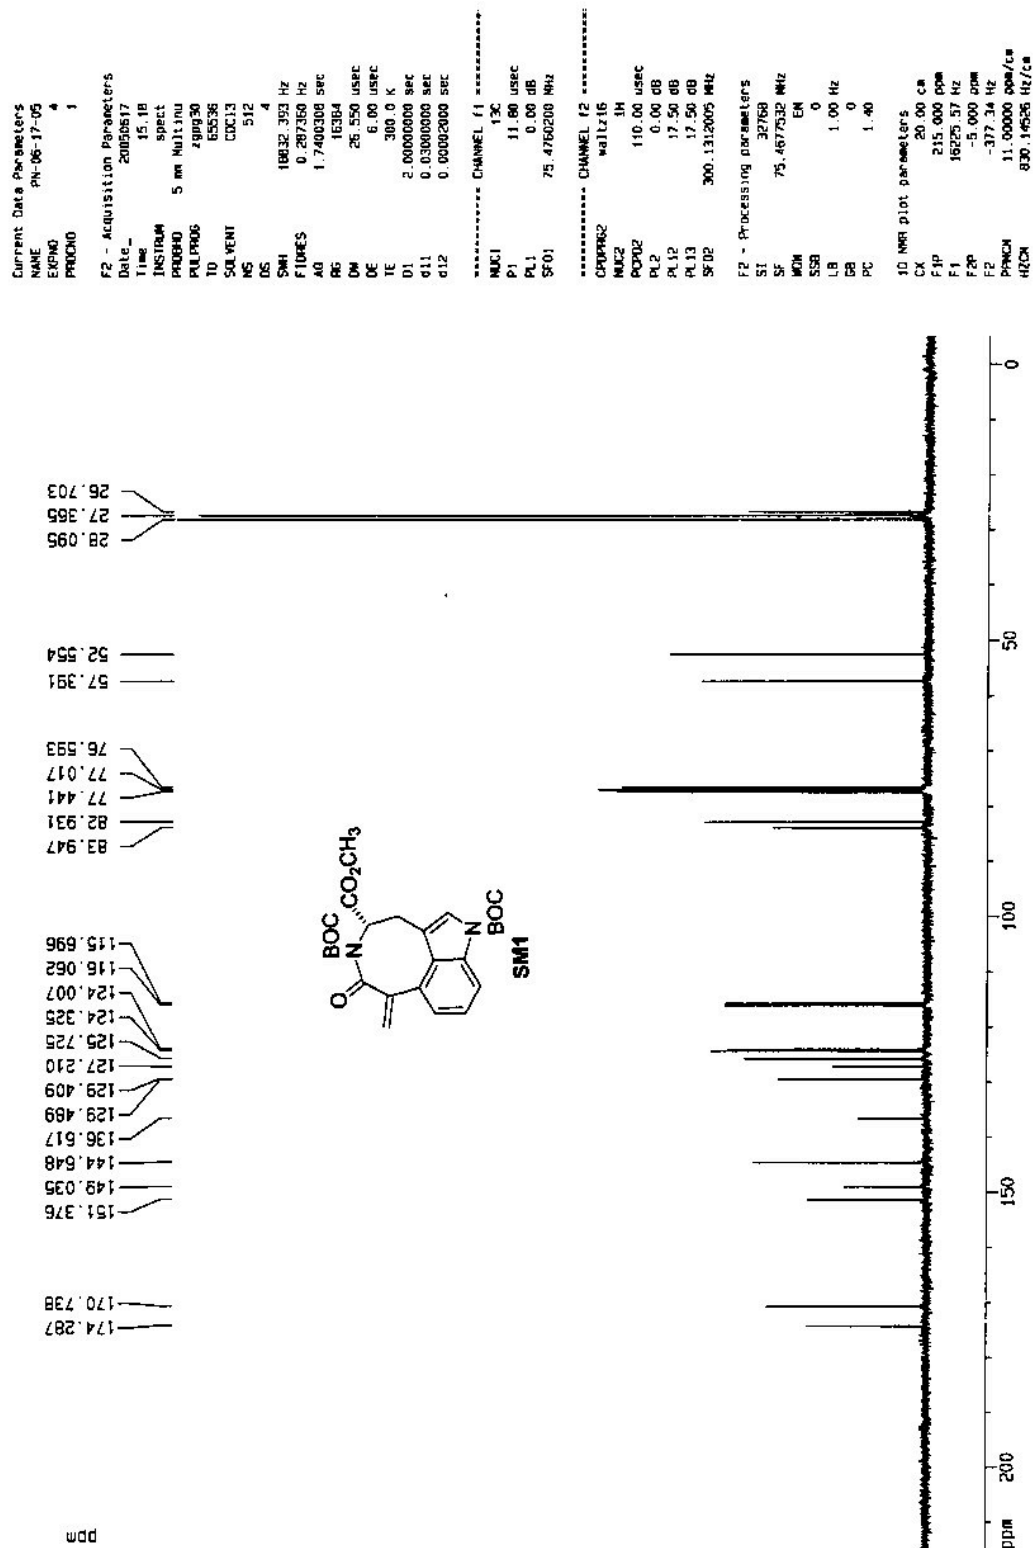

PN2\_p45\_purified\_2 (product)

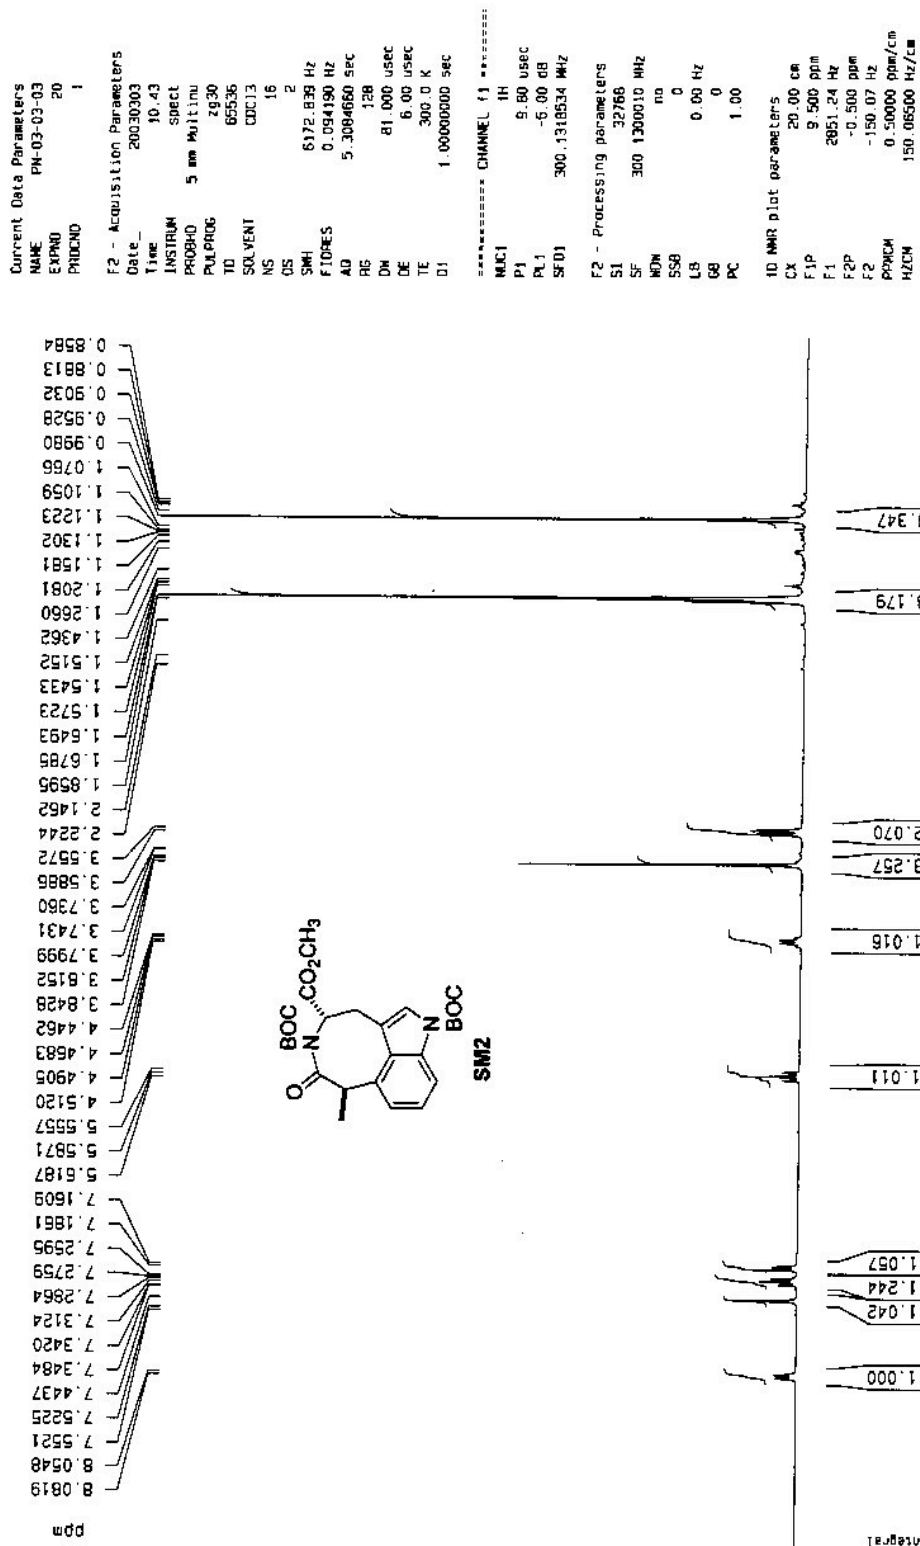

# PN5\_PI59\_purified\_2

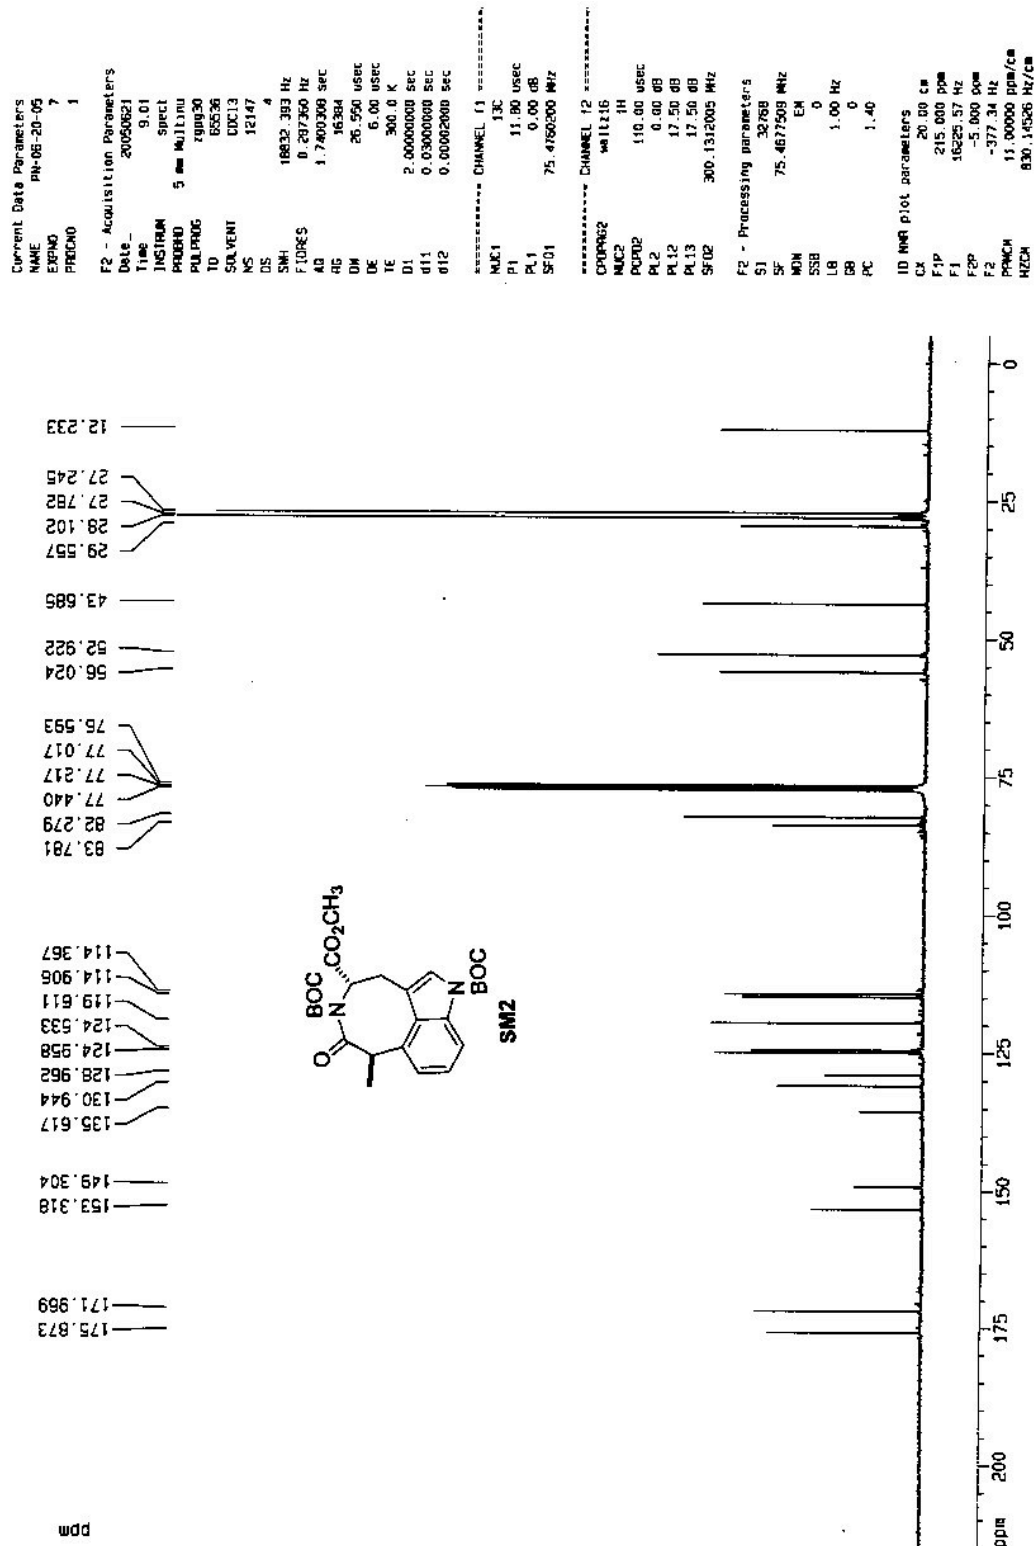

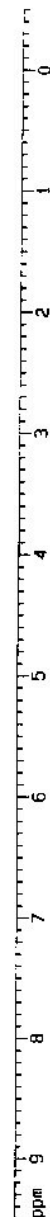

PN5\_P169\_purified\_A

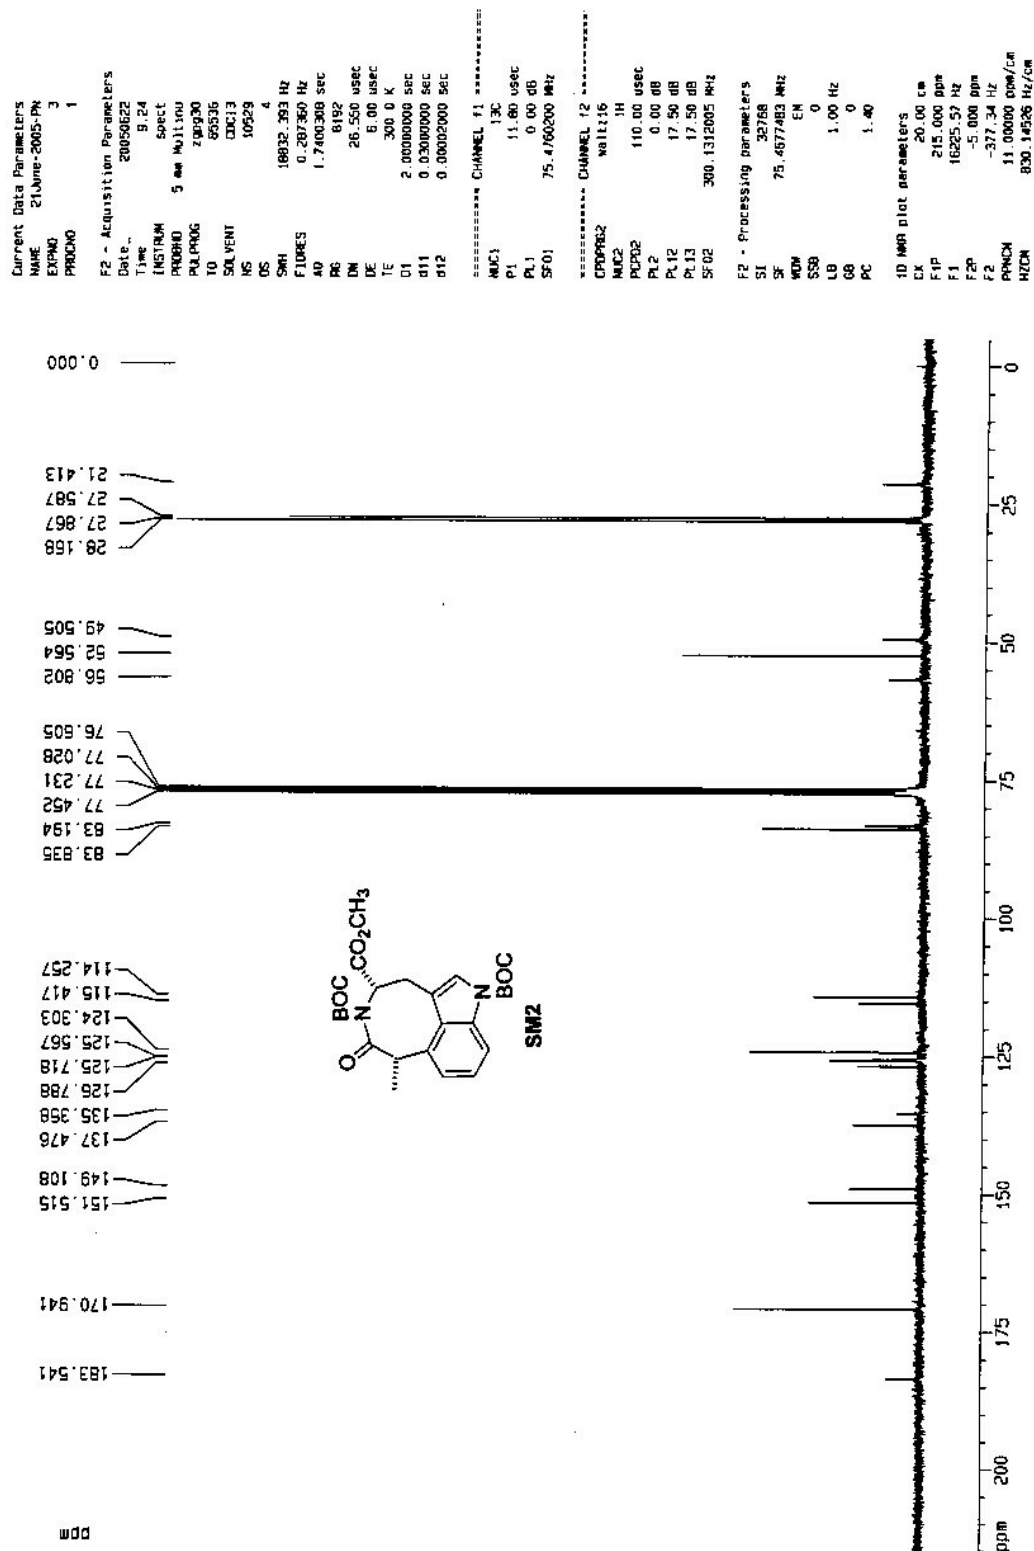

PN4\_P55\_purified

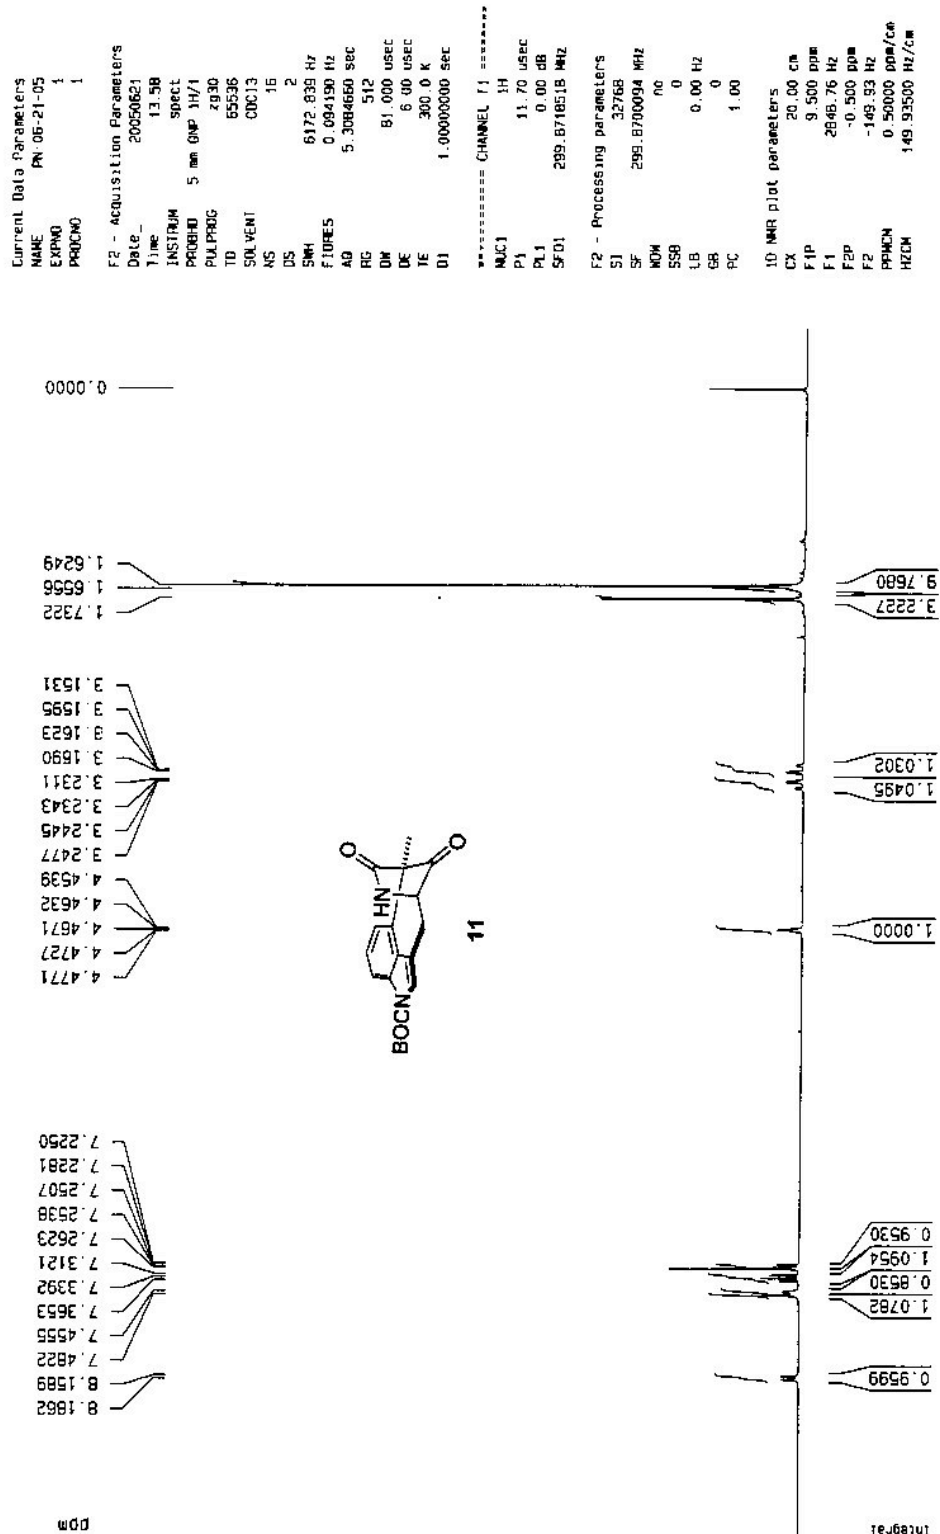

PN4\_P55\_purified

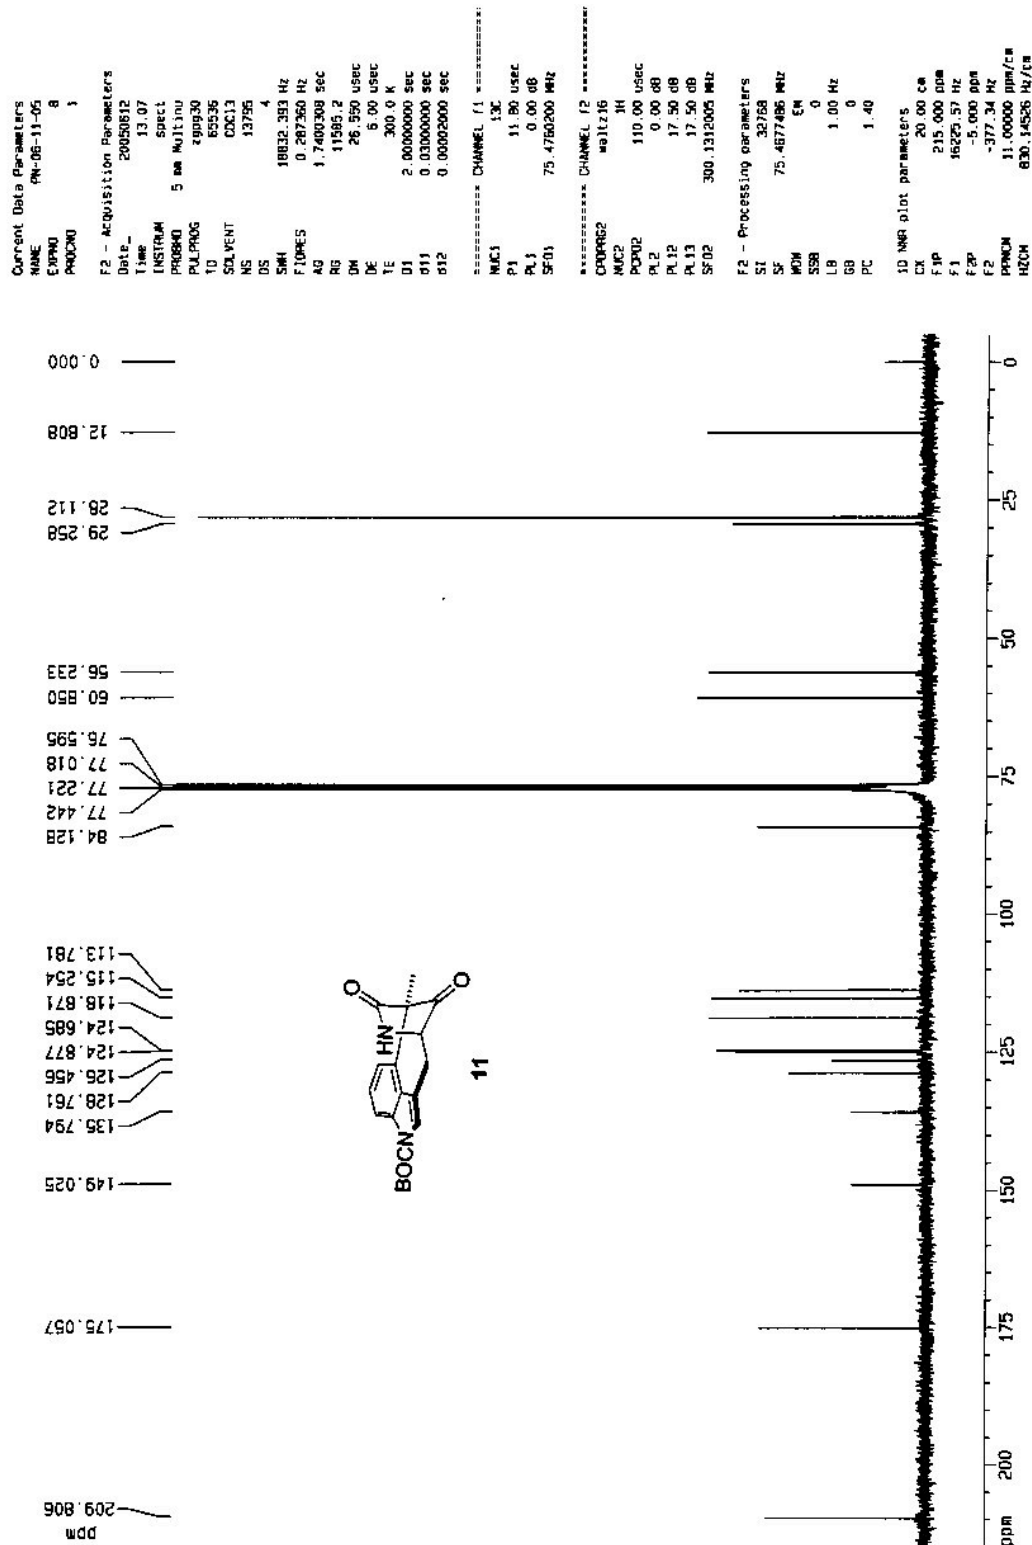

PN3\_P34\_purified

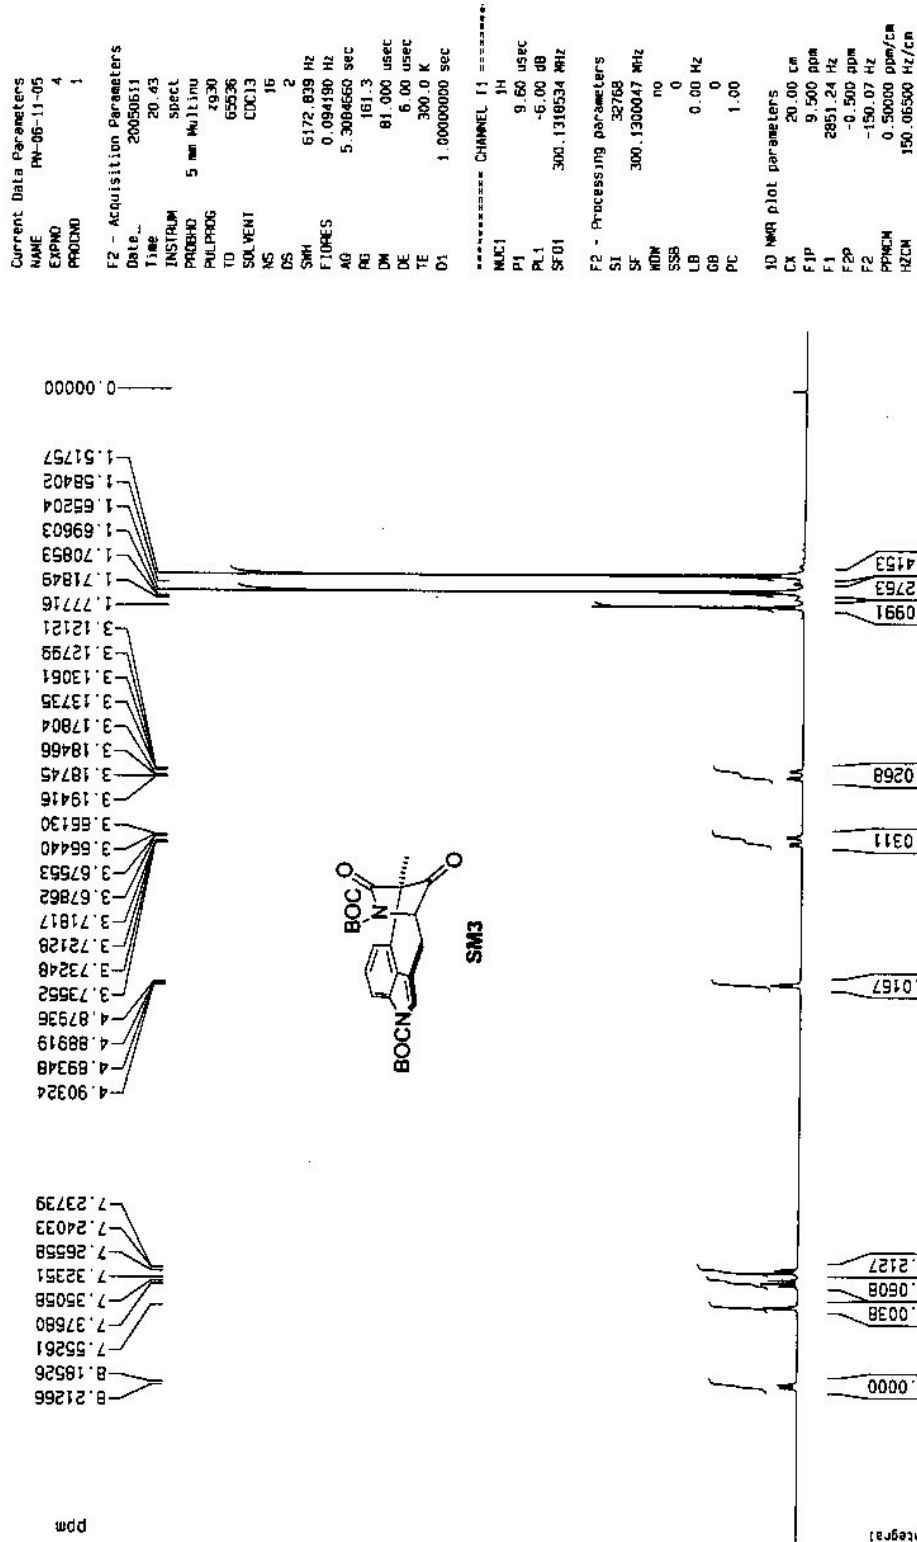



PN3\_P34\_purified

Current Data Parameters  
NAME PN-06-11-05  
EXPNO 5  
PROCNO 1

F2 - Acquisition Parameters  
Date\_ 20050511  
Time 21.50  
INSTRUM spect  
PROBHD 5 mm NUL1H1  
PULPROG zgpg30  
TD 65536  
SOLVENT CDCl3  
NS 1024  
DS 4  
SM1 18832.393 Hz  
FIDRES 0.287366 Hz  
AQ 1.7400308 sec  
RG 16384  
DM 26.950 usec  
DE 6.00 usec  
TE 300.0 K  
D1 2.00000000 sec  
d11 0.03000000 sec  
d12 0.00020000 sec

===== CHANNEL f1 =====  
NUC1 13C  
P1 11.80 usec  
PL1 0.00 dB  
SF01 75.4760200 MHz  
===== CHANNEL f2 =====  
CPDPRG2 waltz16  
NUC2 1H  
PCPD2 110.00 usec  
PL2 0.00 dB  
PL12 17.50 dB  
PL13 17.50 dB  
SF02 300.1312005 MHz

F2 - Processing parameters  
SI 32768  
SF 75.467526 MHz  
RG 0  
WDW EM  
SSB 0  
LB 1.00 Hz  
GB 0  
PC 1.40

1D NMR plot parameters  
CX 20.00 cm  
FIP 215.900 ppm  
F1 16255.57 Hz  
F2 -377.34 Hz  
PPMCH 11.00000 ppm/cm  
NUCH 630.14526 Hz/cm

ppm  
207.575  
170.608  
149.312  
148.998  
135.776  
127.577  
126.271  
124.890  
124.745  
118.849  
115.545  
113.206  
84.350  
84.210  
77.441  
77.017  
76.592  
64.757  
59.055  
28.081  
27.913  
26.940  
13.420

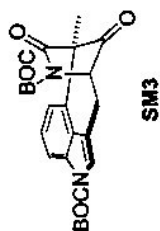

PN5\_P162\_purified

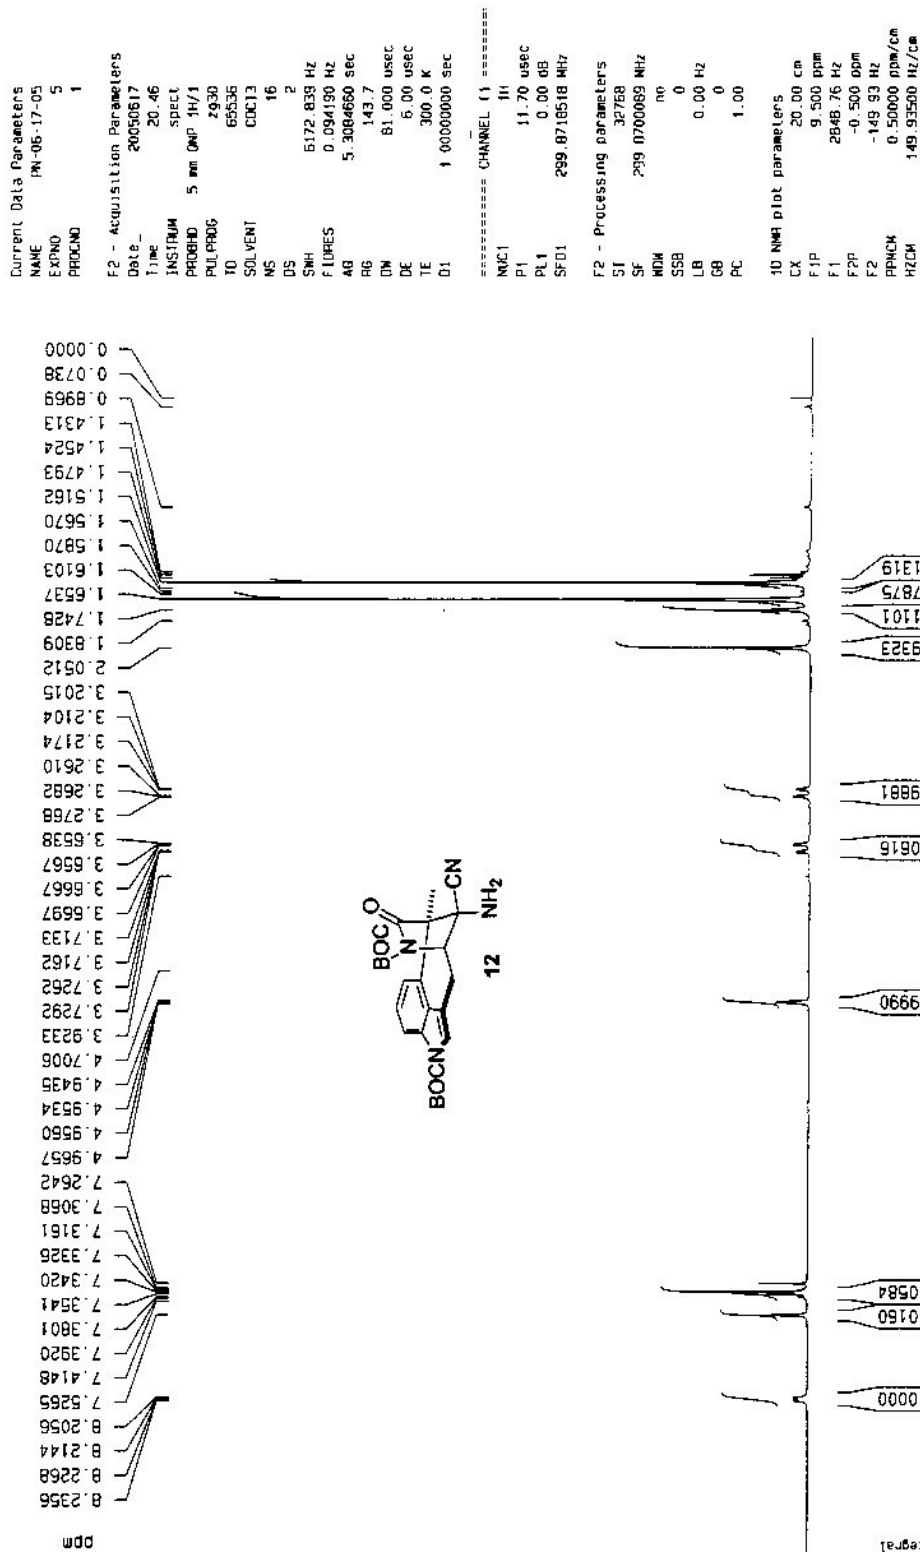

# PN5\_P162\_purified

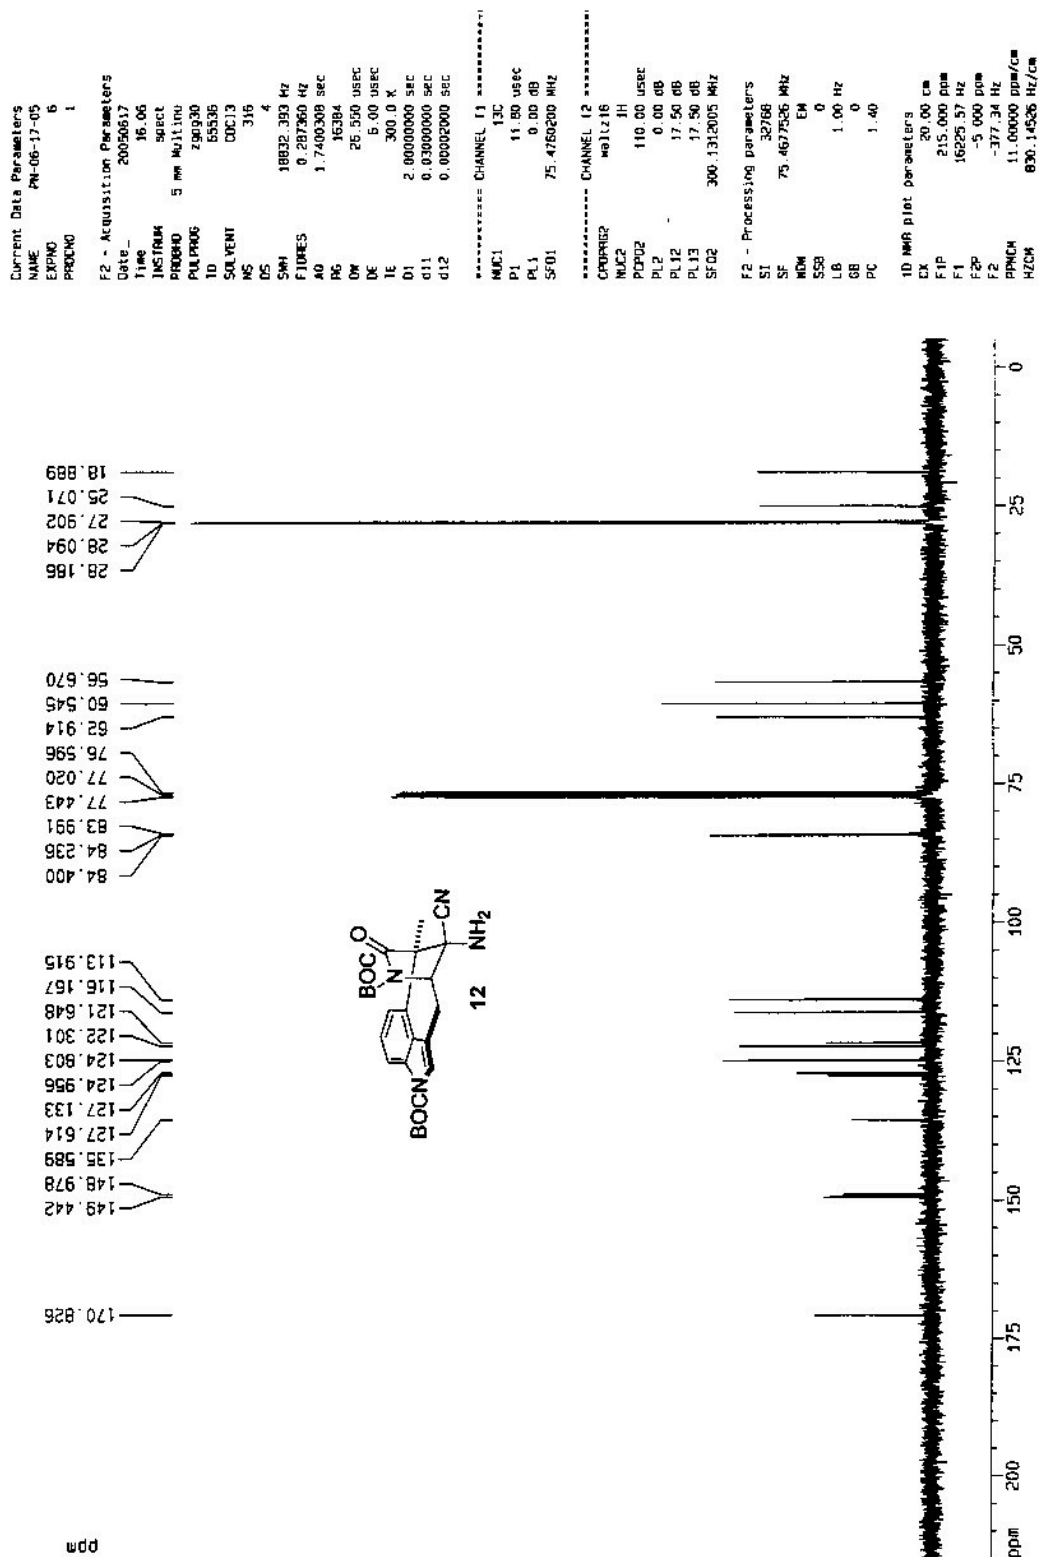

Current Data Parameters  
NAME PN-07-02-04  
EXPNO 11  
PROCNO 1

F2 - Acquisition Parameters  
Date\_ 20040702  
Time 10:02  
INSTRUM spect  
PROBHD 5 mm BBI 1H-B  
PULPROG zgpg30  
TD 65536  
SOLVENT CDCl3  
NS 1  
DS 0  
SMH B27B 146 Hz  
FIDRES 0.126314 Hz  
AQ 3.9584243 sec  
RG 16  
DN 50.400 usec  
DE 6.00 usec  
TE 300.0 K  
D1 1.0000000 sec  
D12 0.0000040 sec

===== CHANNEL f1 =====  
NUC1 1H  
P1 7.00 usec  
PL1 0.00 dB  
SF01 400.1314289 MHz

F2 - Processing parameters  
SI 32768  
SF 400.1259890 MHz  
WDW no  
SSB 0  
LB 0.00 Hz  
GB 0  
PC 1.00

1D NMR plot parameters  
CX 20.00 cm  
FIP 9.500 ppm  
F1 35001.23 Hz  
F2P -0.500 ppm  
F2 -200.06 Hz  
PPMCM 0.50000 ppm/cm  
HZCM 200.06498 Hz/cm

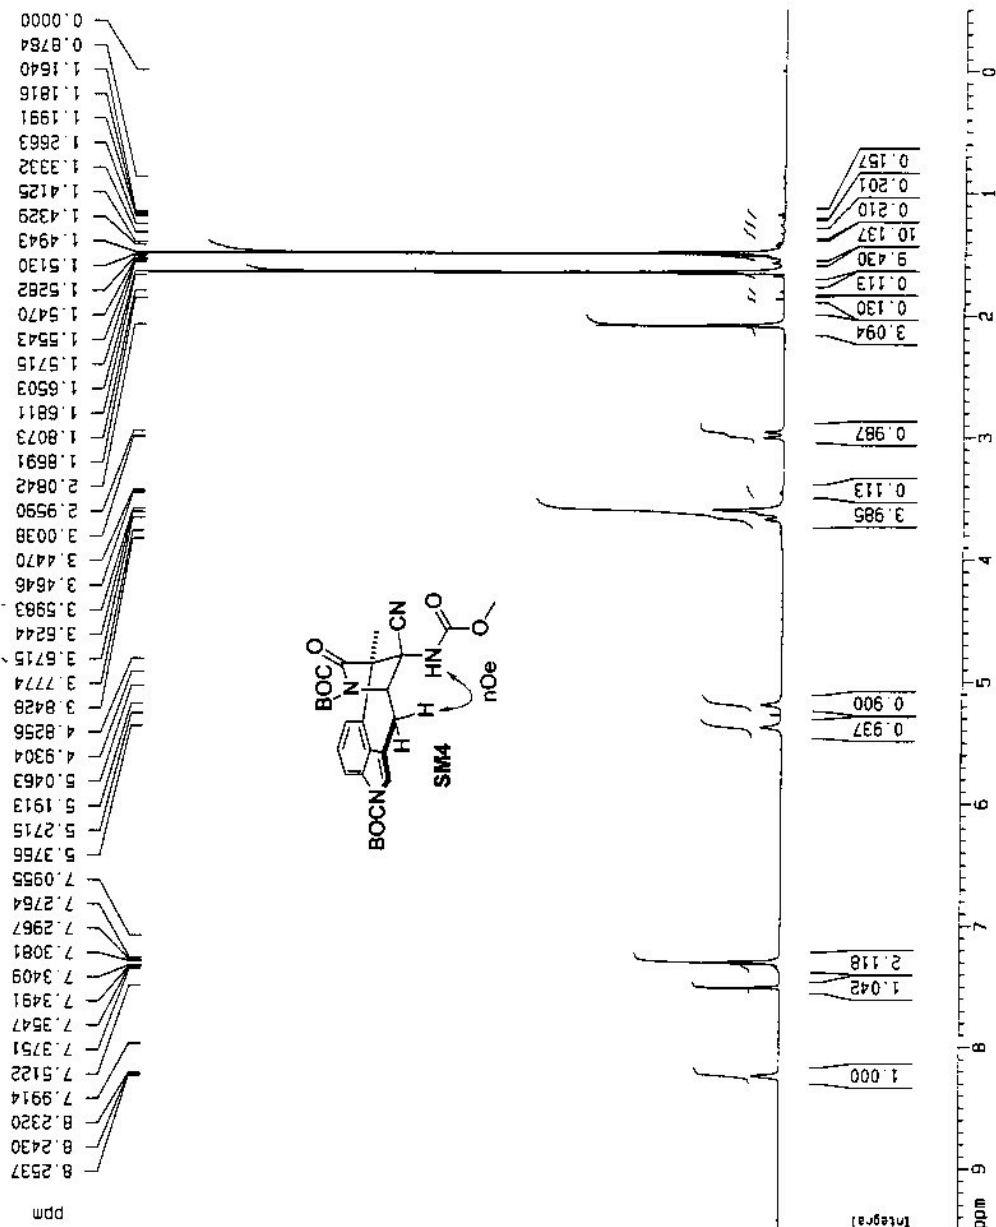

PN4\_p97\_purified

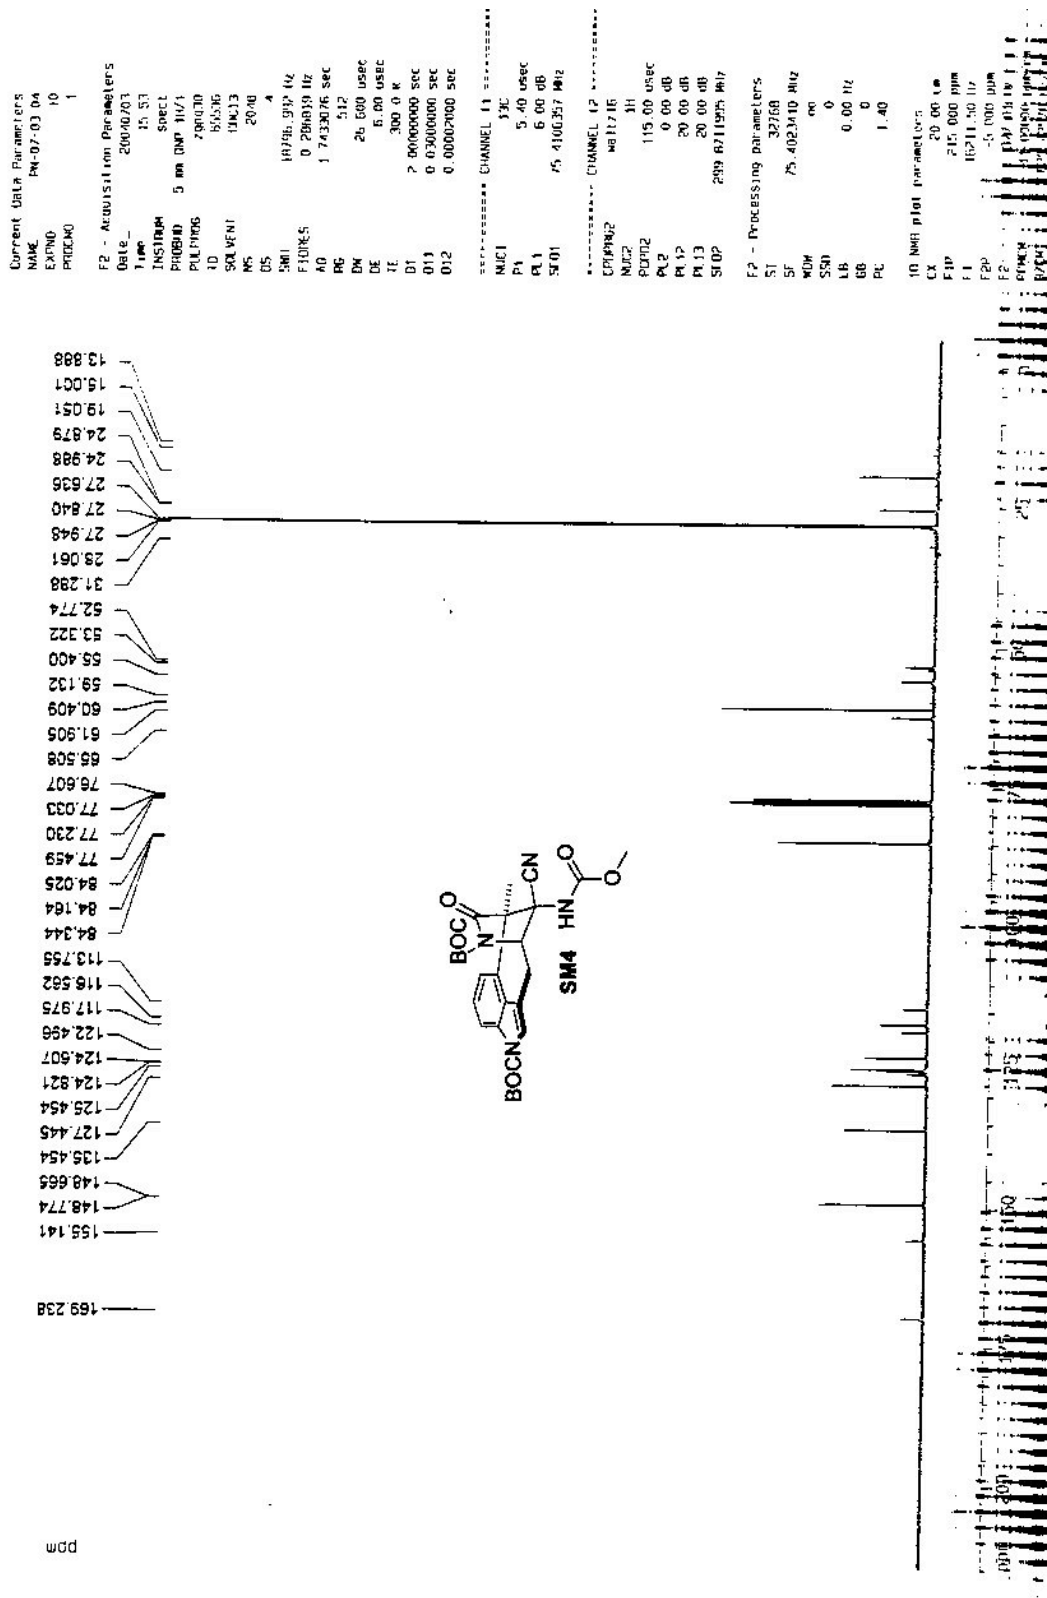

PN4\_p9f\_crude

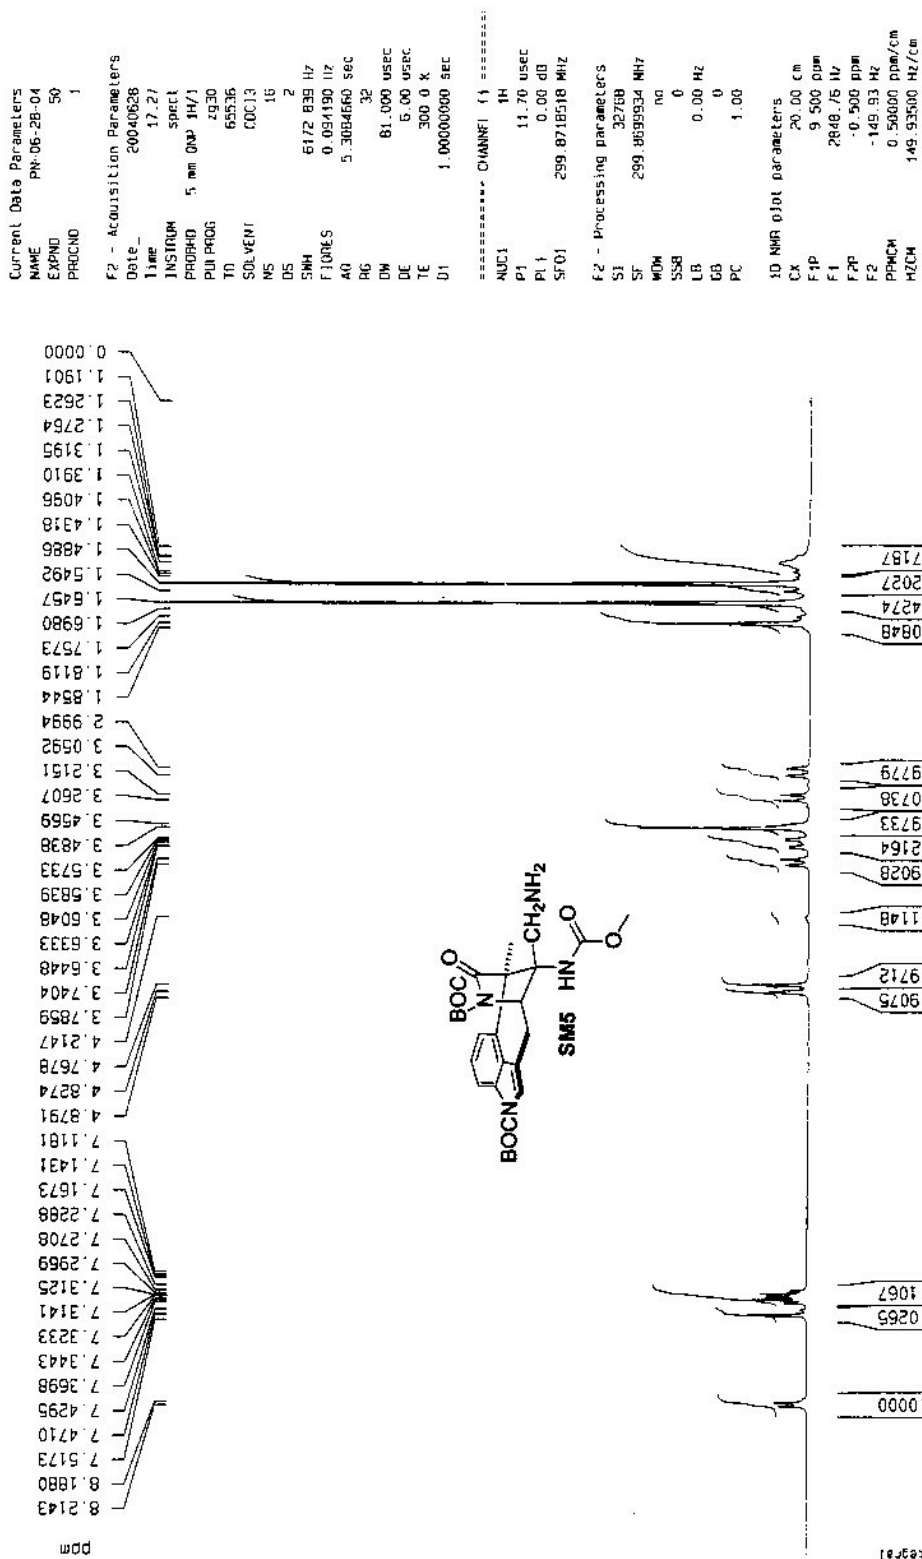

PM4\_p91\_crude

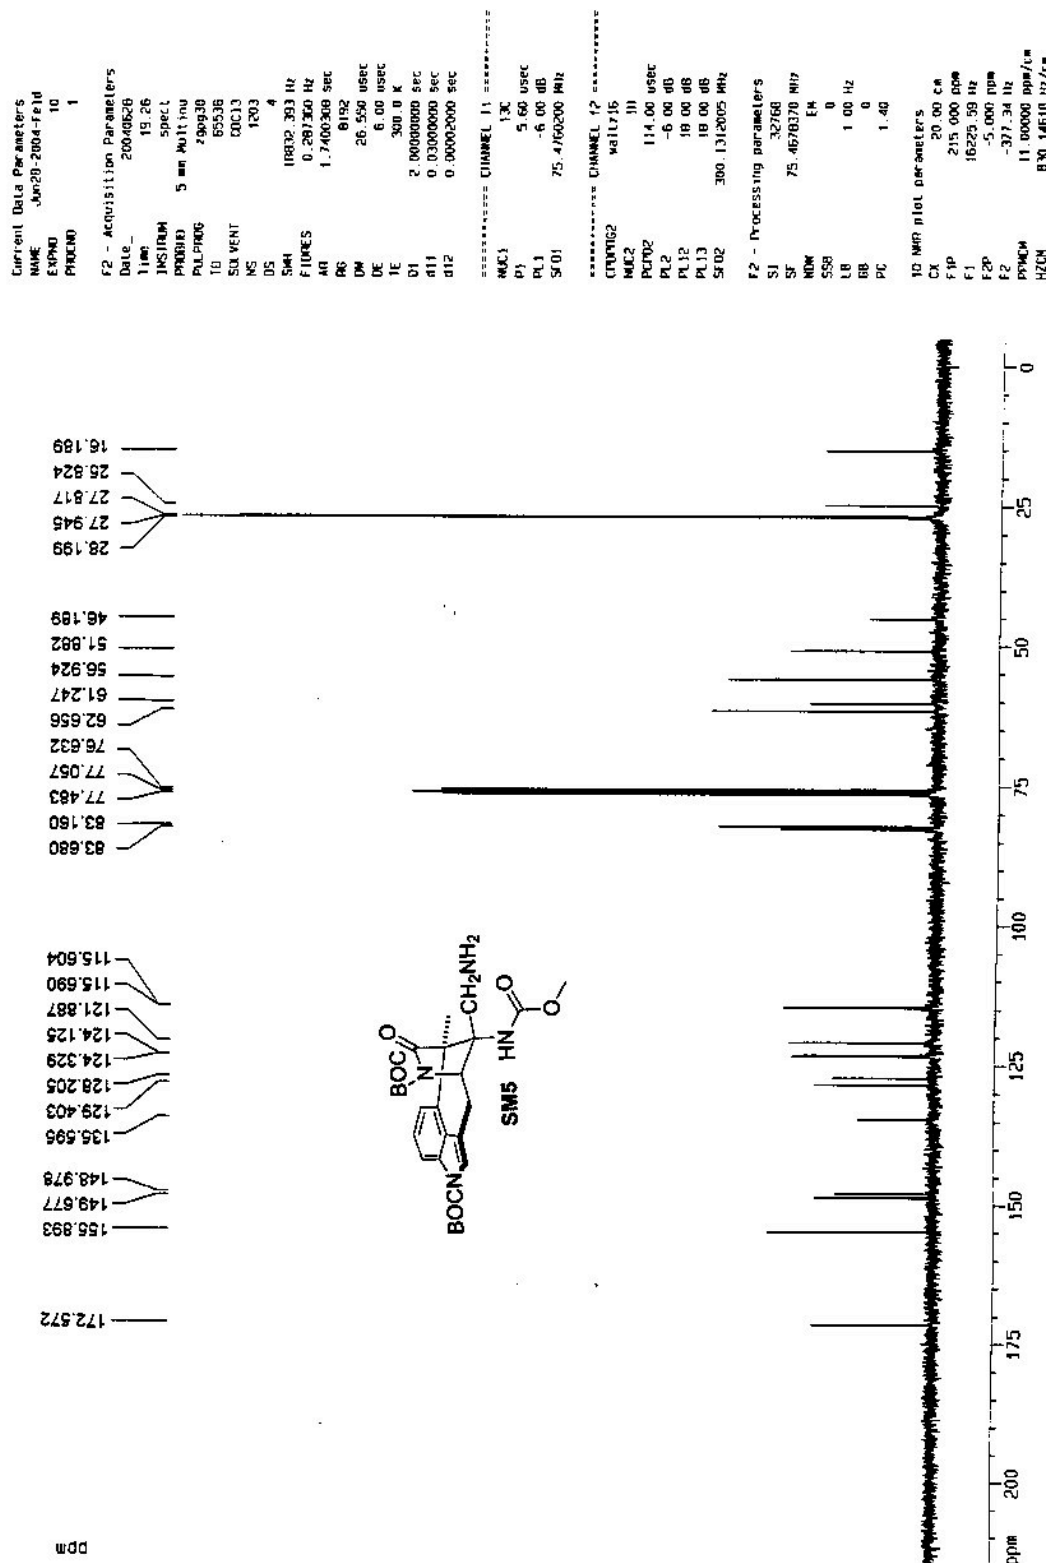

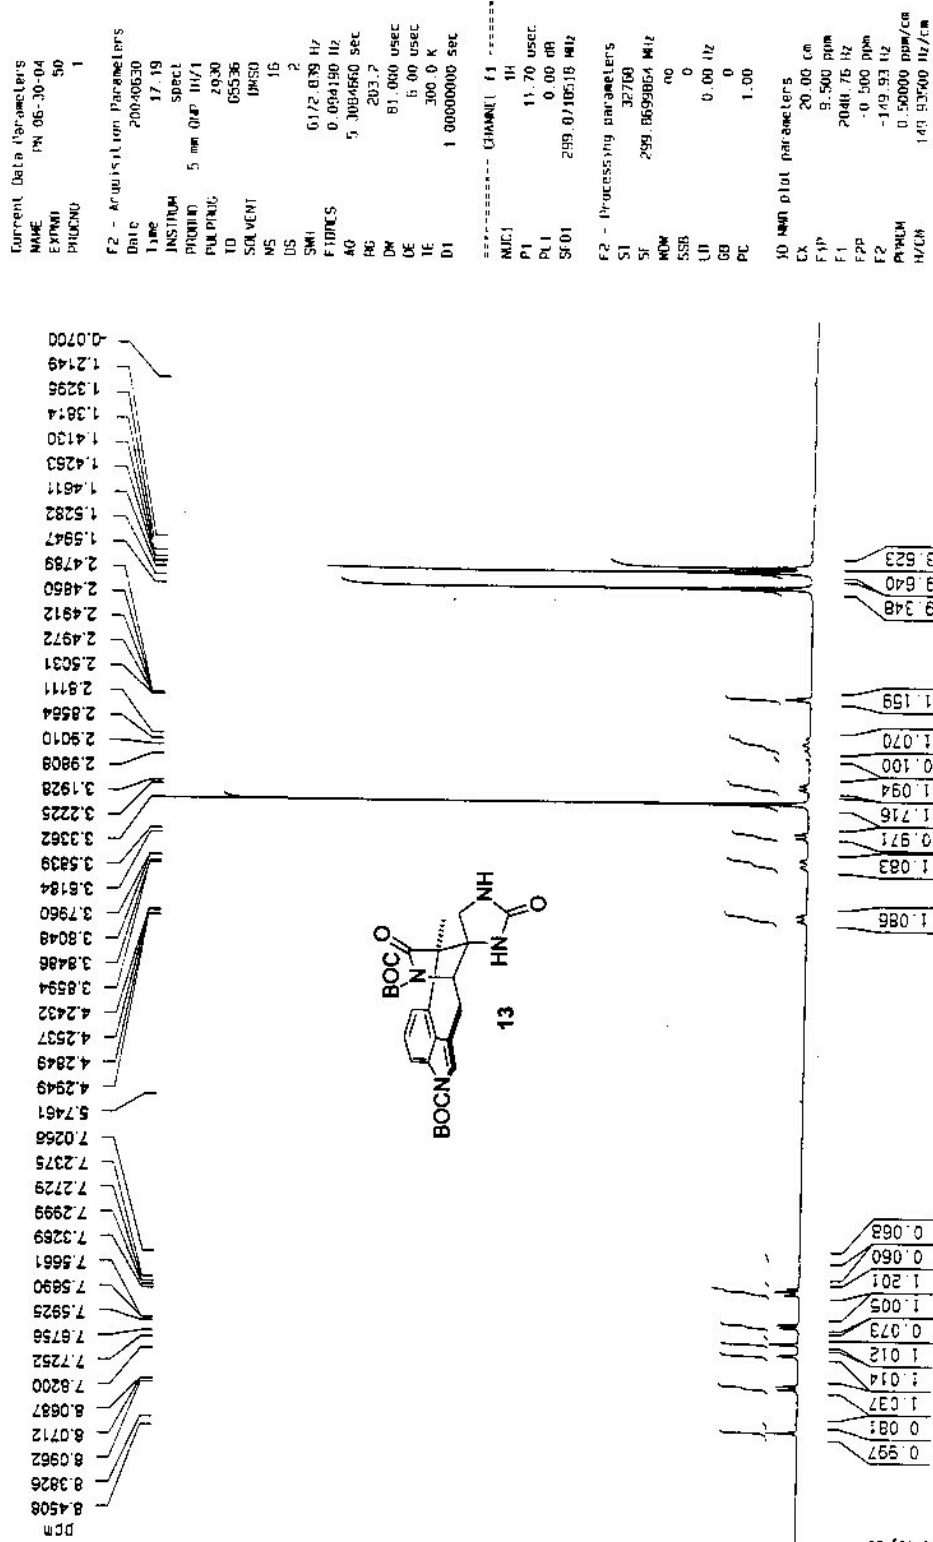



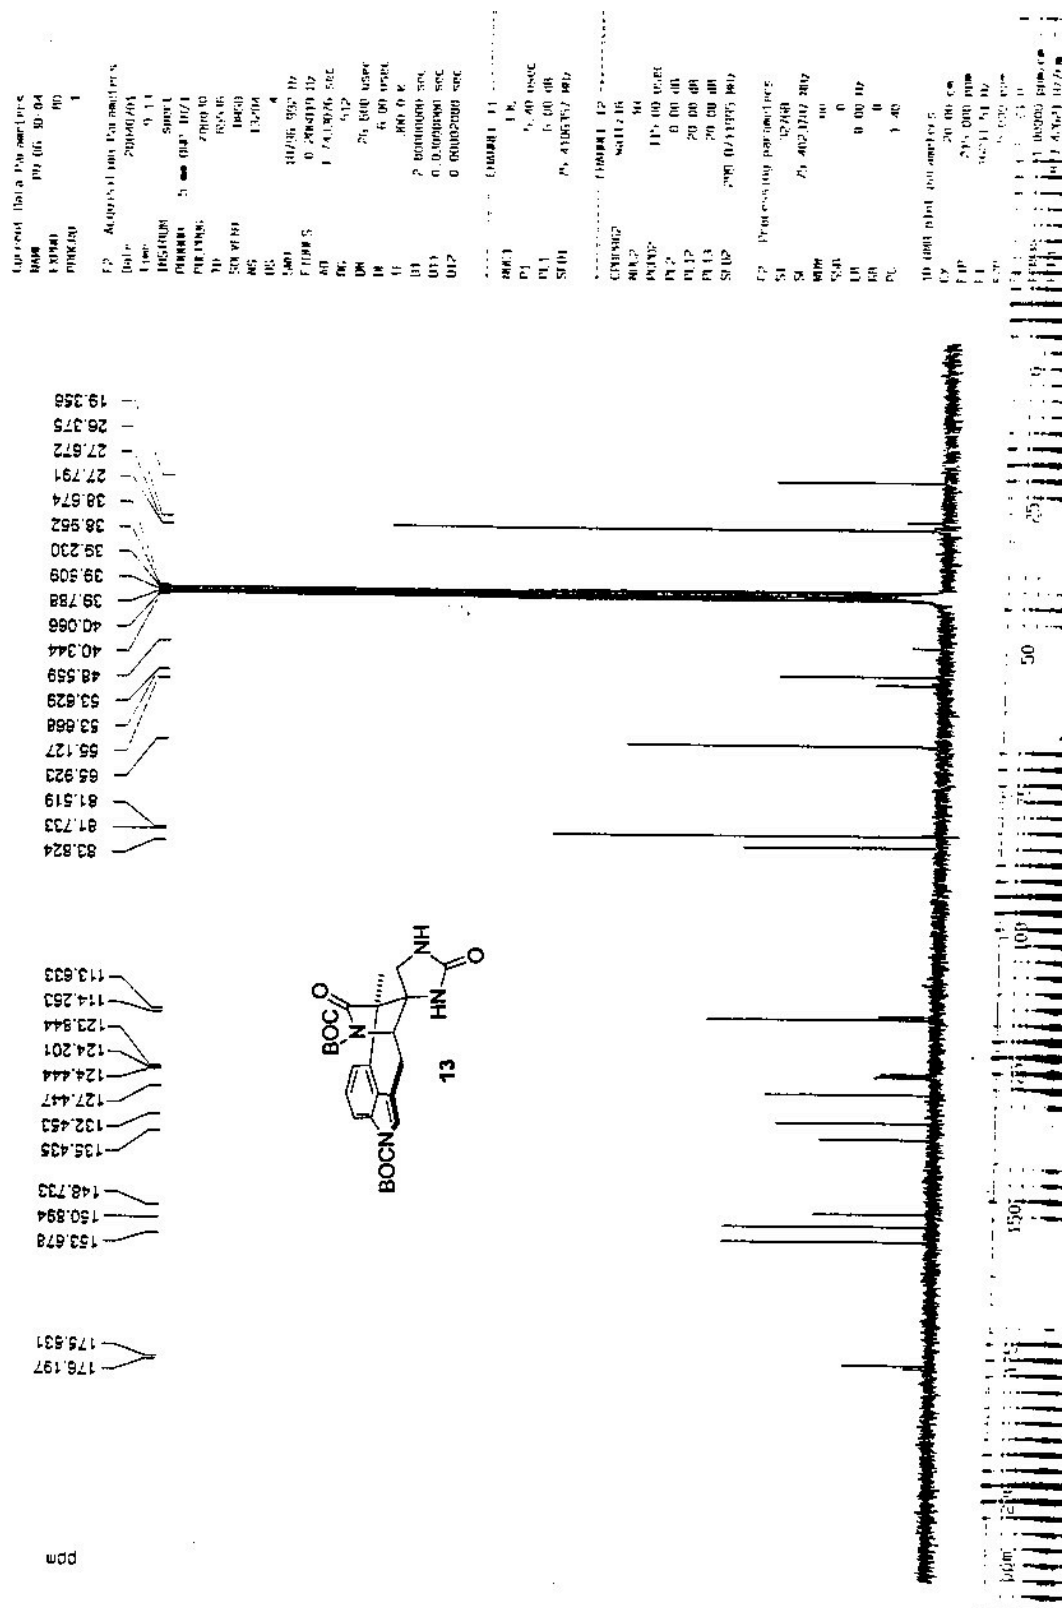

PN5\_P154\_Purified\_B

Current Data Parameters  
NAME PN-05-08-05  
EXPNO 1  
PROCNO 1

F2 - Acquisition Parameters  
Date\_ 20050608  
Time 19.52  
INSTRUM spect  
PROBHD 5 mm QNP 1H/1  
PULPROG zgpg30  
TD 65536  
SOLVENT CDCl3  
NS 16  
DS 2  
SWH 6172.839 Hz  
FIDRES 0.094190 Hz  
AQ 5.3084660 sec  
RG 35.9  
QM 81.000 usec  
DE 6.00 usec  
TE 300.0 K  
D1 1.0000000 sec

===== CHANNEL f1 =====  
NUC1 1H  
P1 11.70 usec  
PL1 0.00 dB  
SFO1 299.871518 MHz

F2 - Processing parameters  
SI 32768  
SF 299.870048 MHz  
WDW no  
SSB 0  
LB 0.00 Hz  
GB 0  
PC 1.00

1D NMR plot parameters  
CX 20.00 cm  
F1P 9.500 ppm  
F1 2848.76 Hz  
F2P -0.500 ppm  
F2 -149.93 Hz  
PPM0 0.0000 ppm/cm  
HZ0 149.93500 Hz/cm

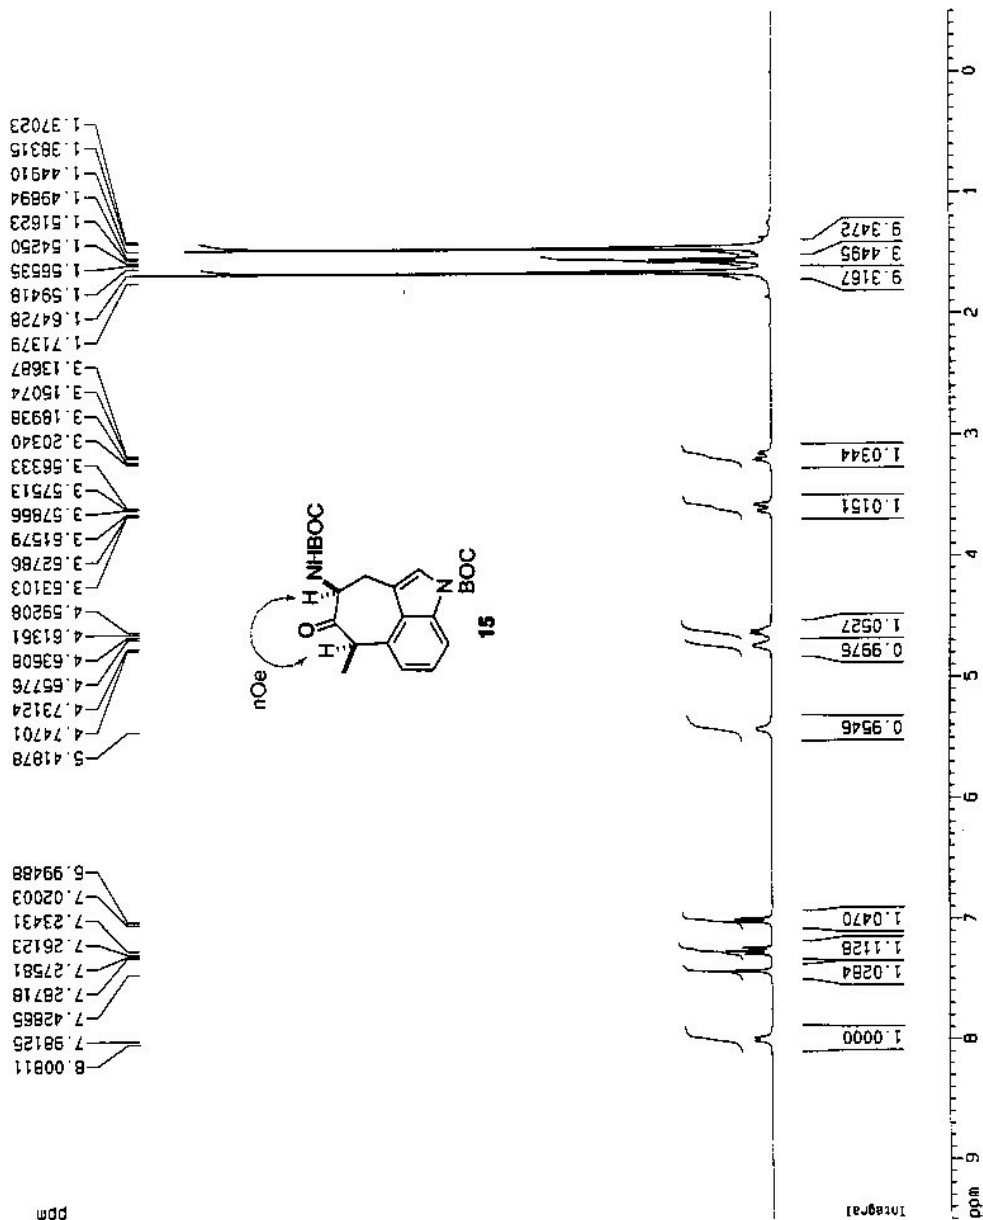

PN5\_P154\_purified\_B

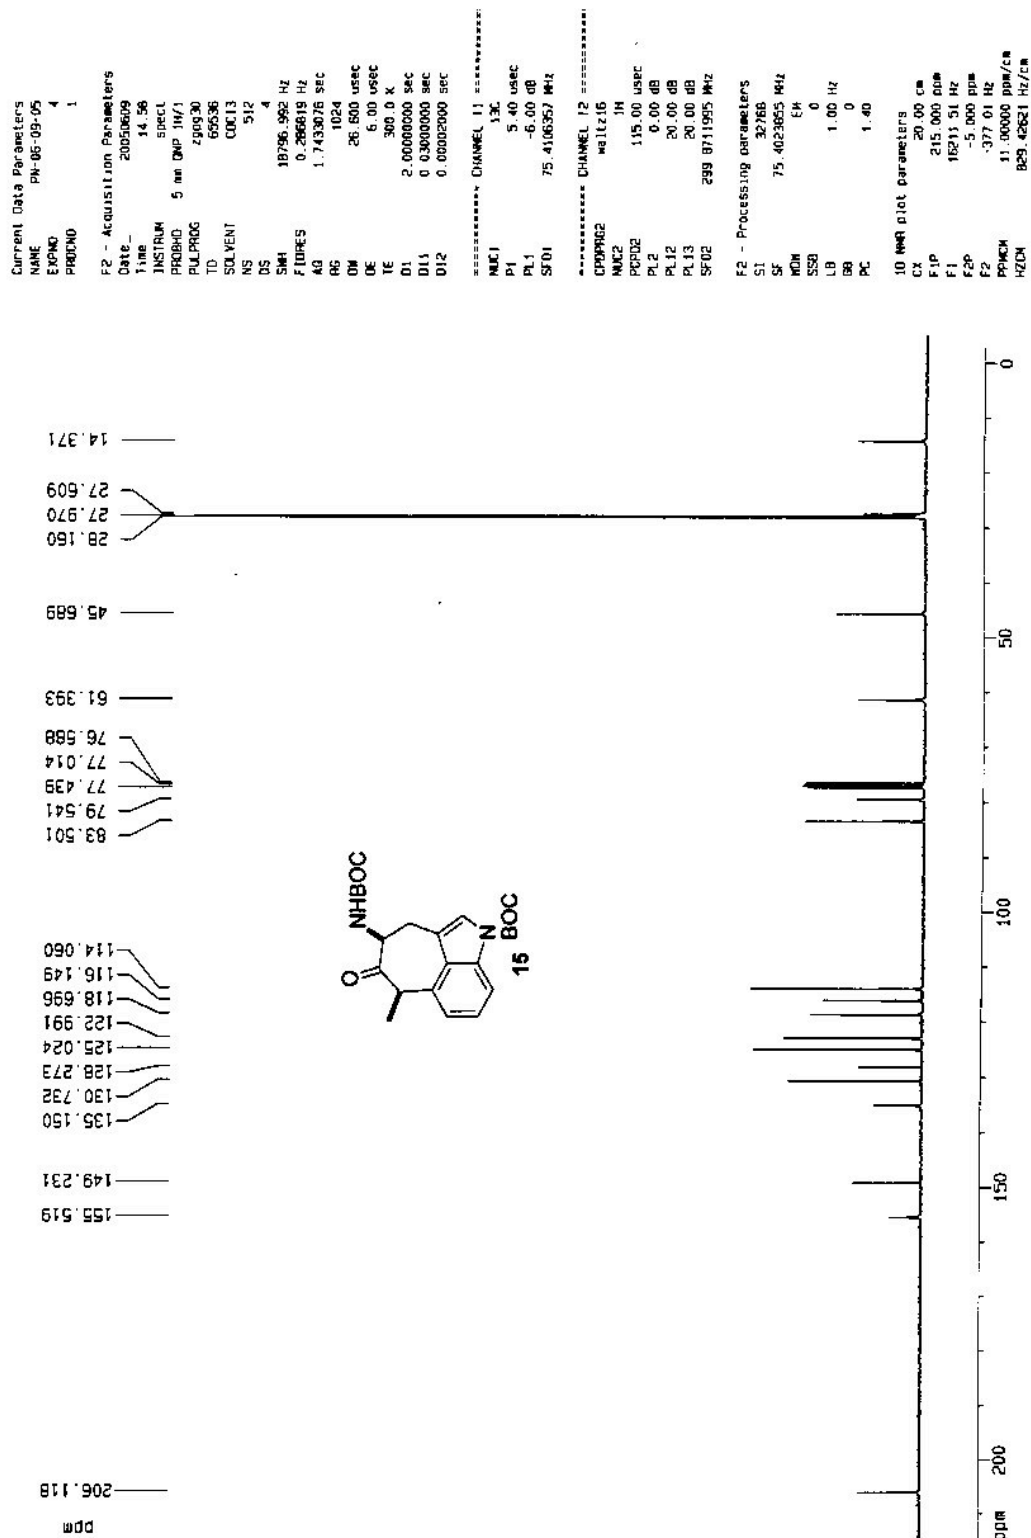

PN2\_P125\_purified\_1

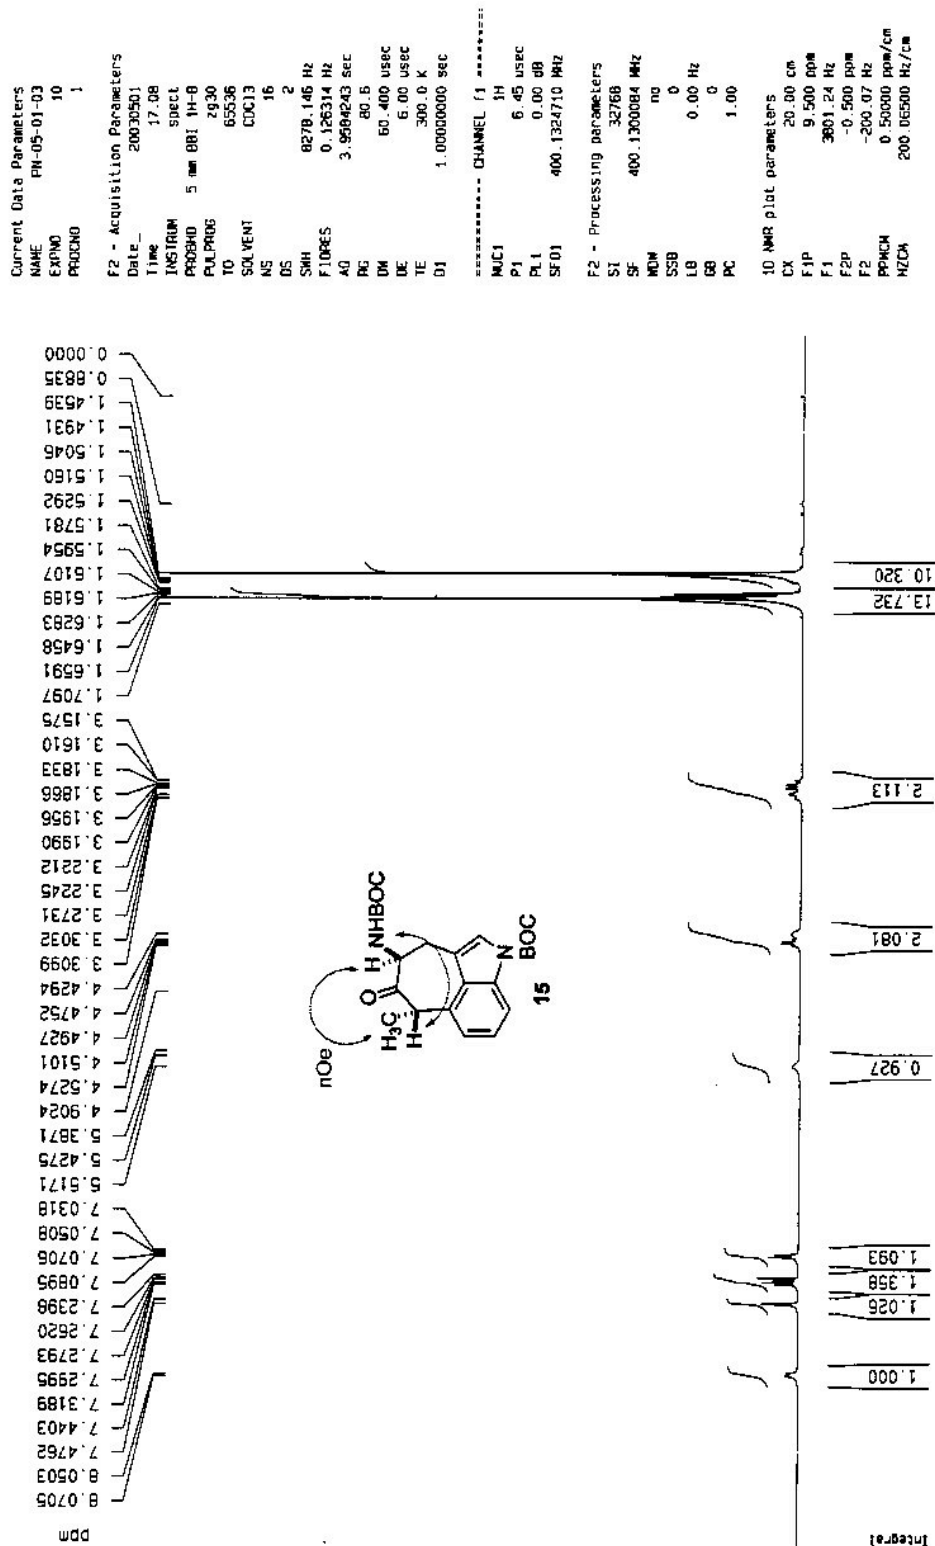

# PN5\_P154\_purified\_A

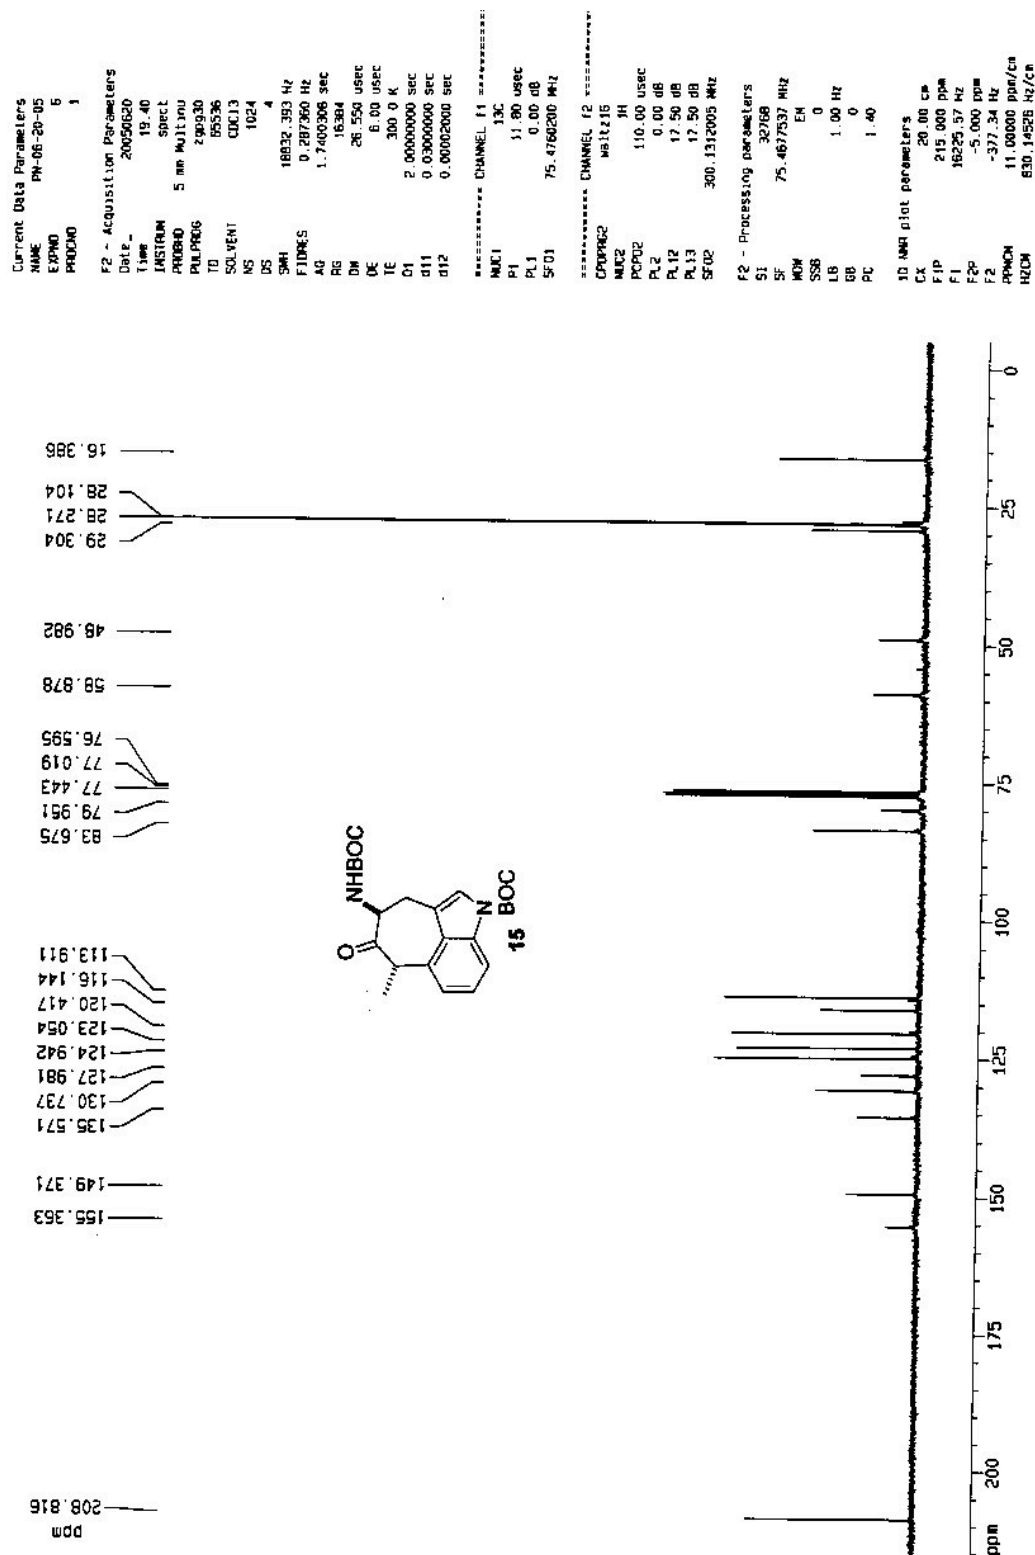

PN5\_P156\_purified

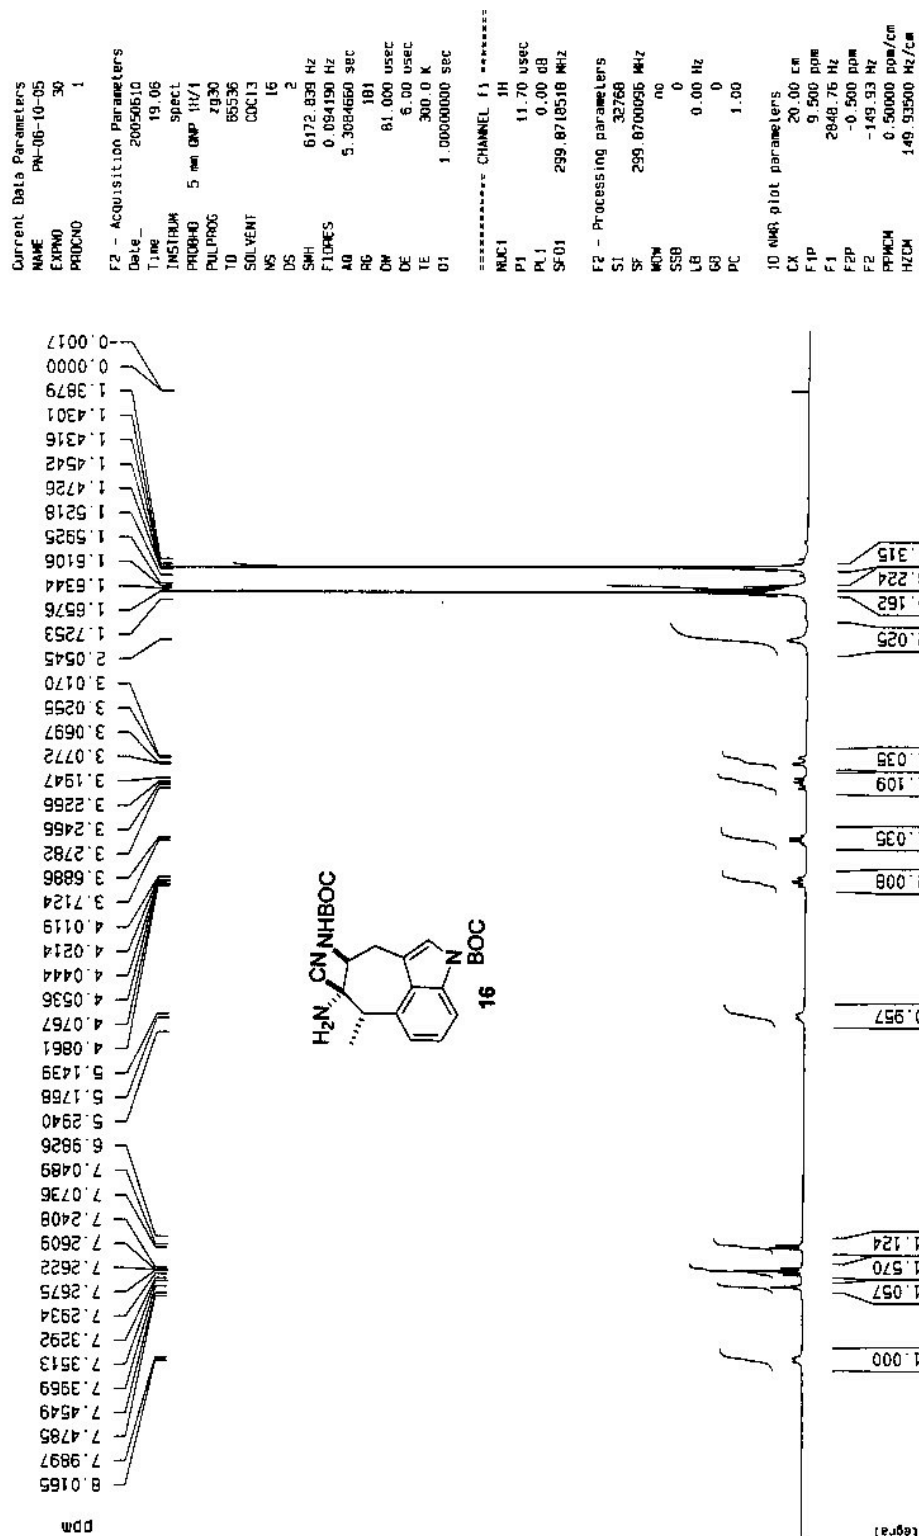

PNS\_P156\_purified

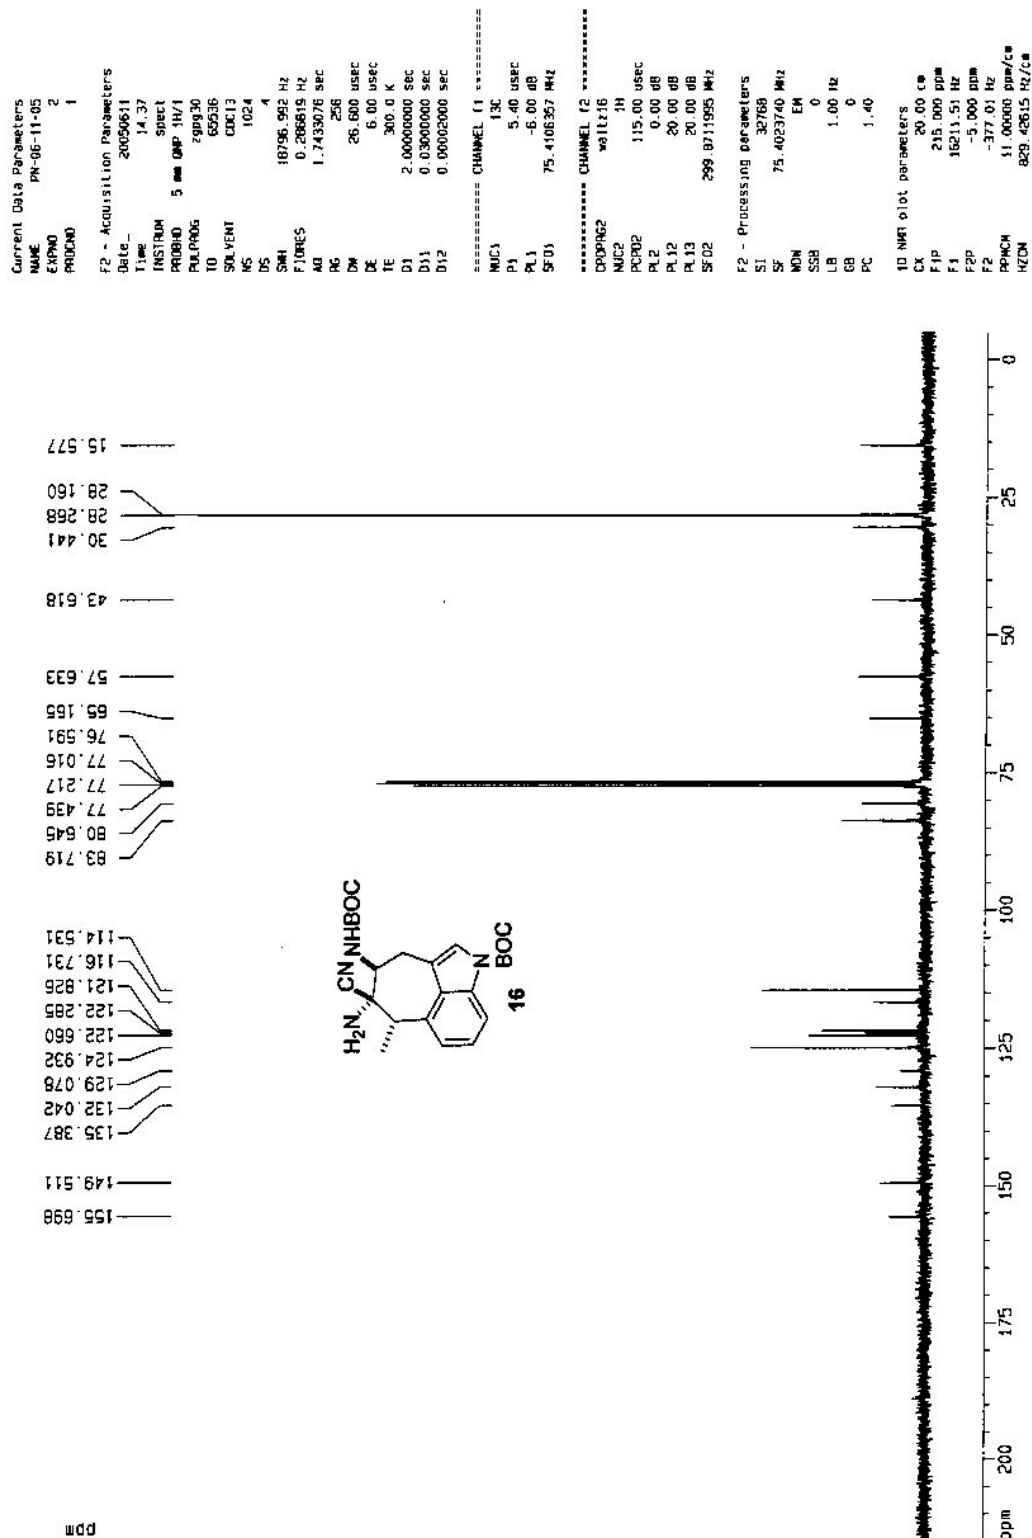

# PN5\_P157\_purified

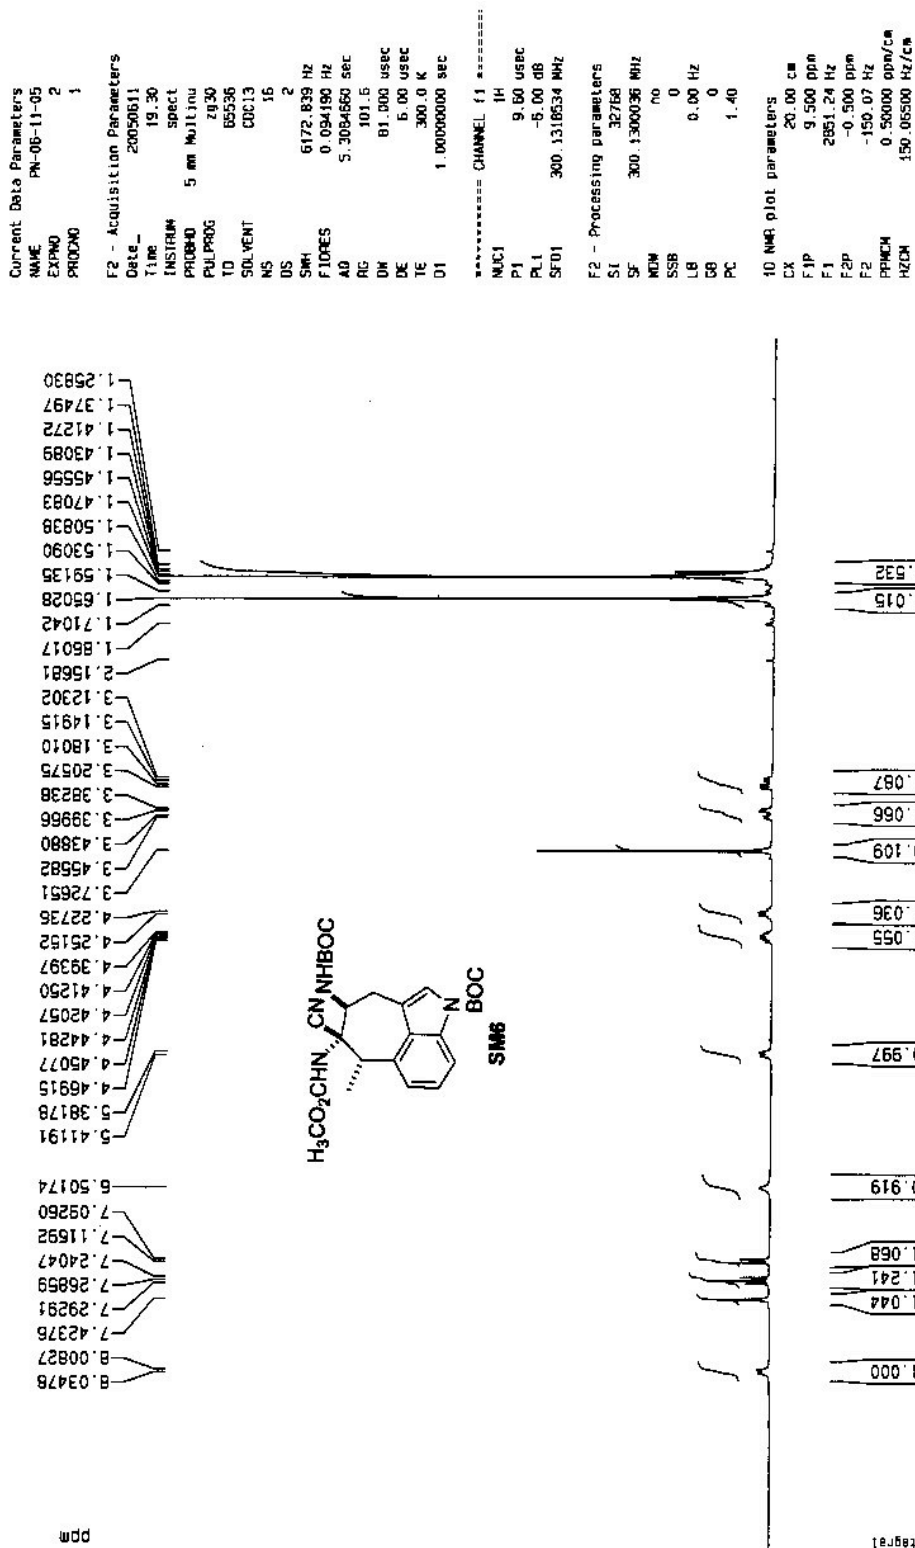



# PW5\_P157\_purified

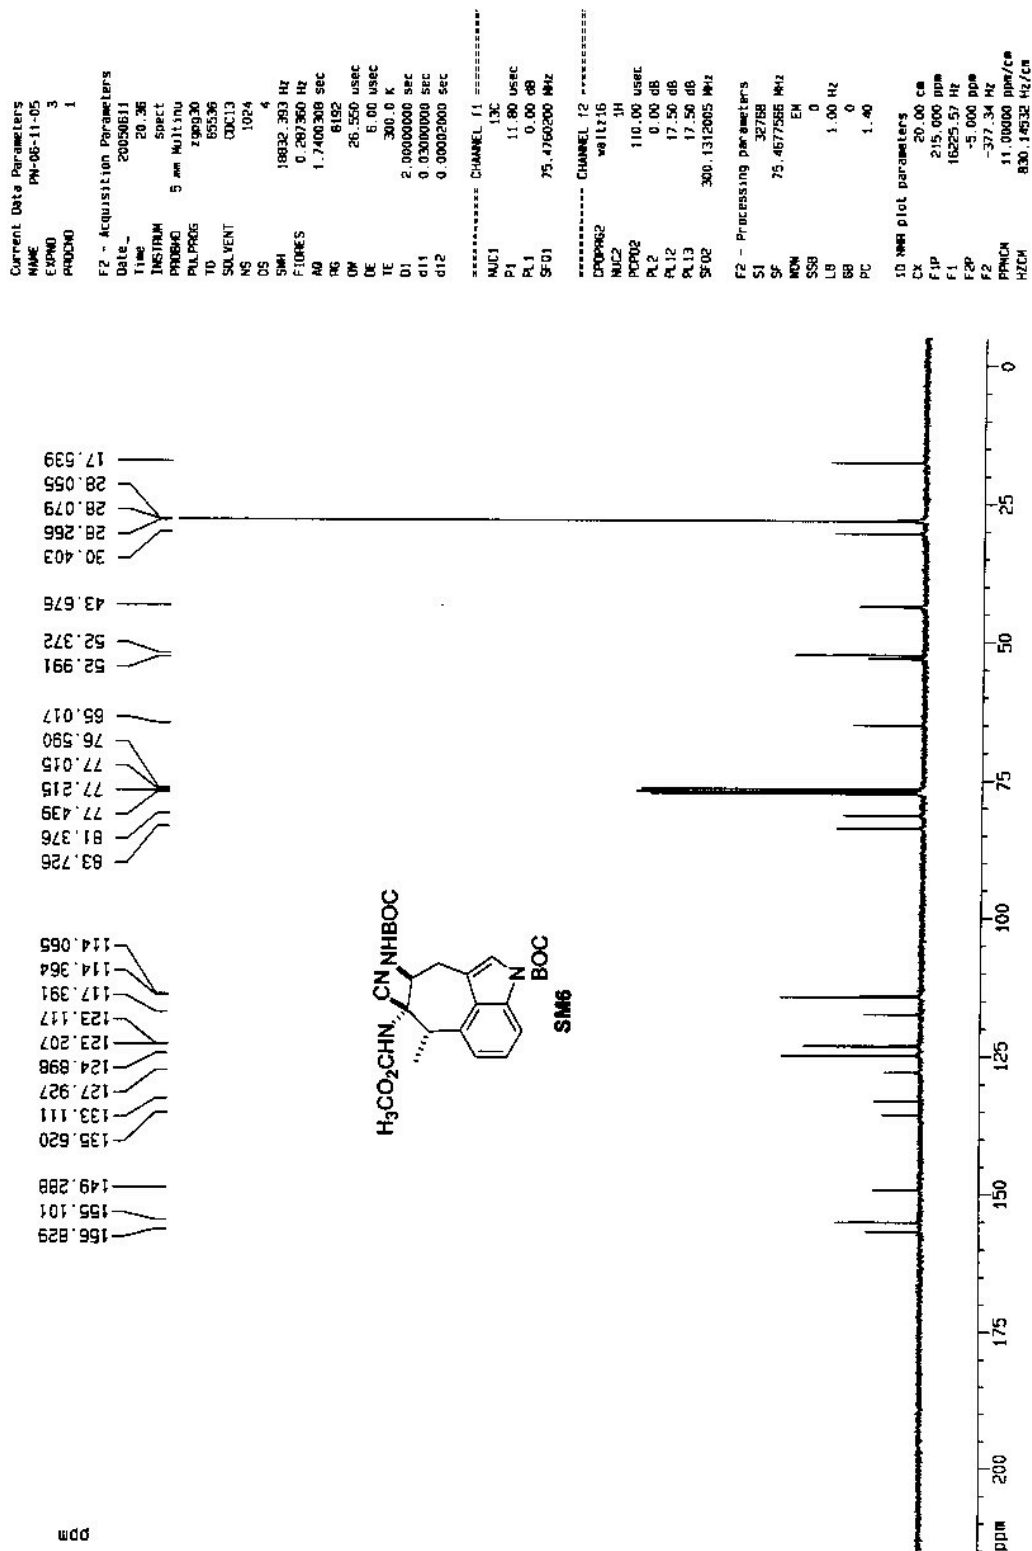

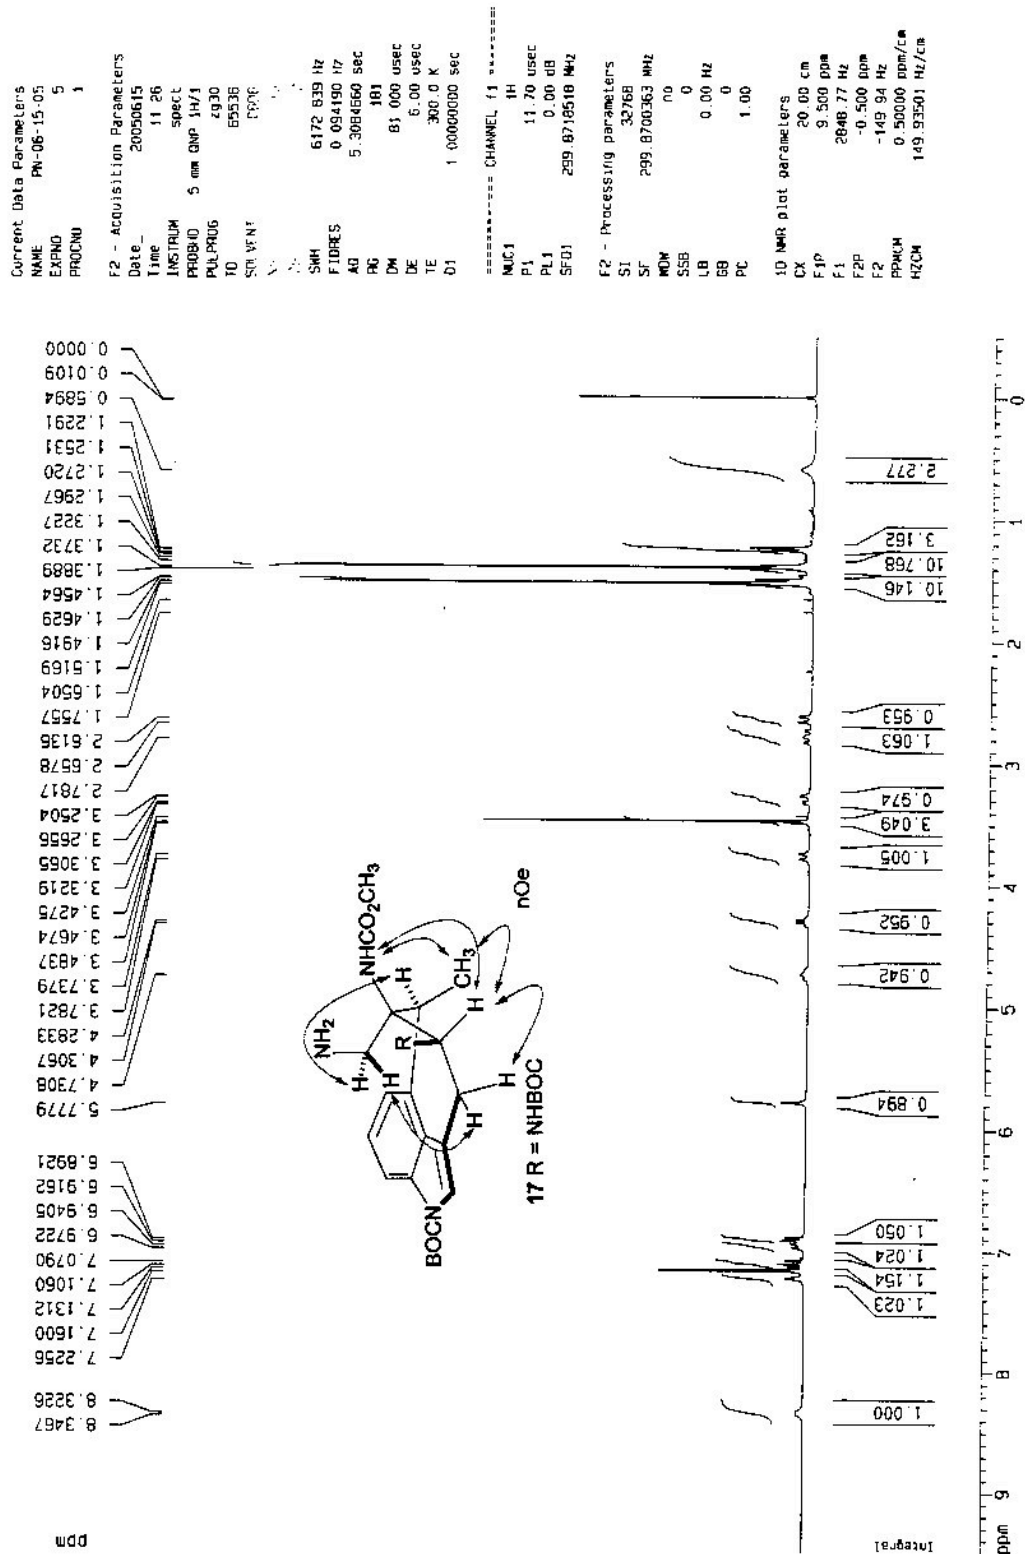

PNS\_P159\_purified

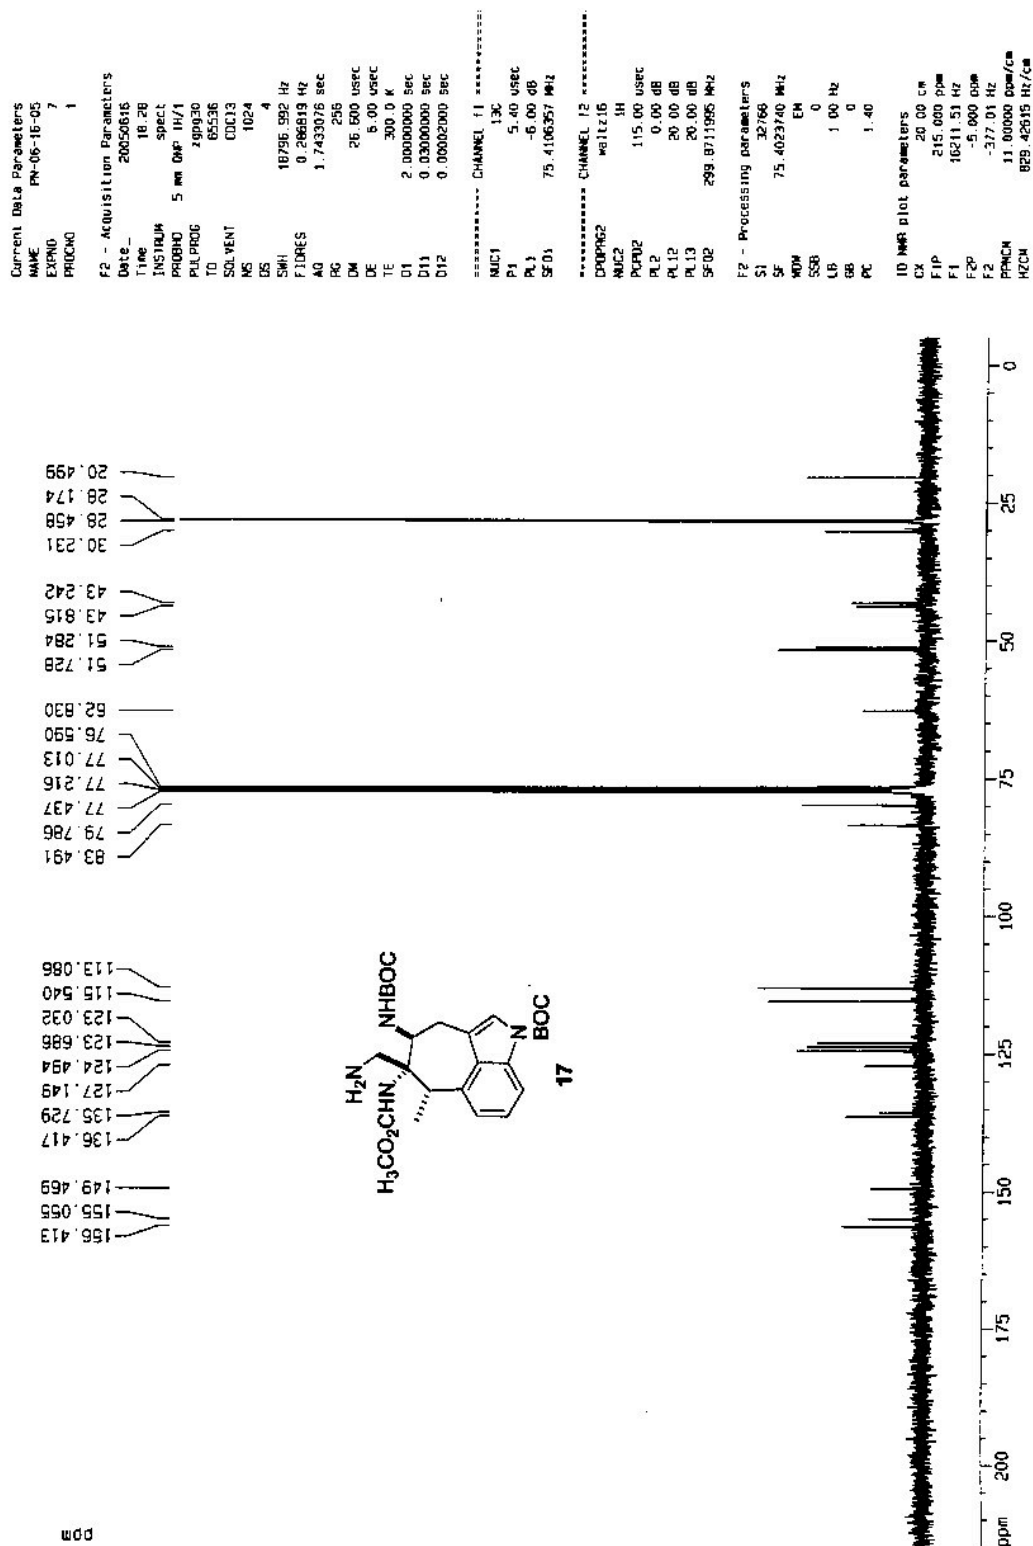

PM5\_P264

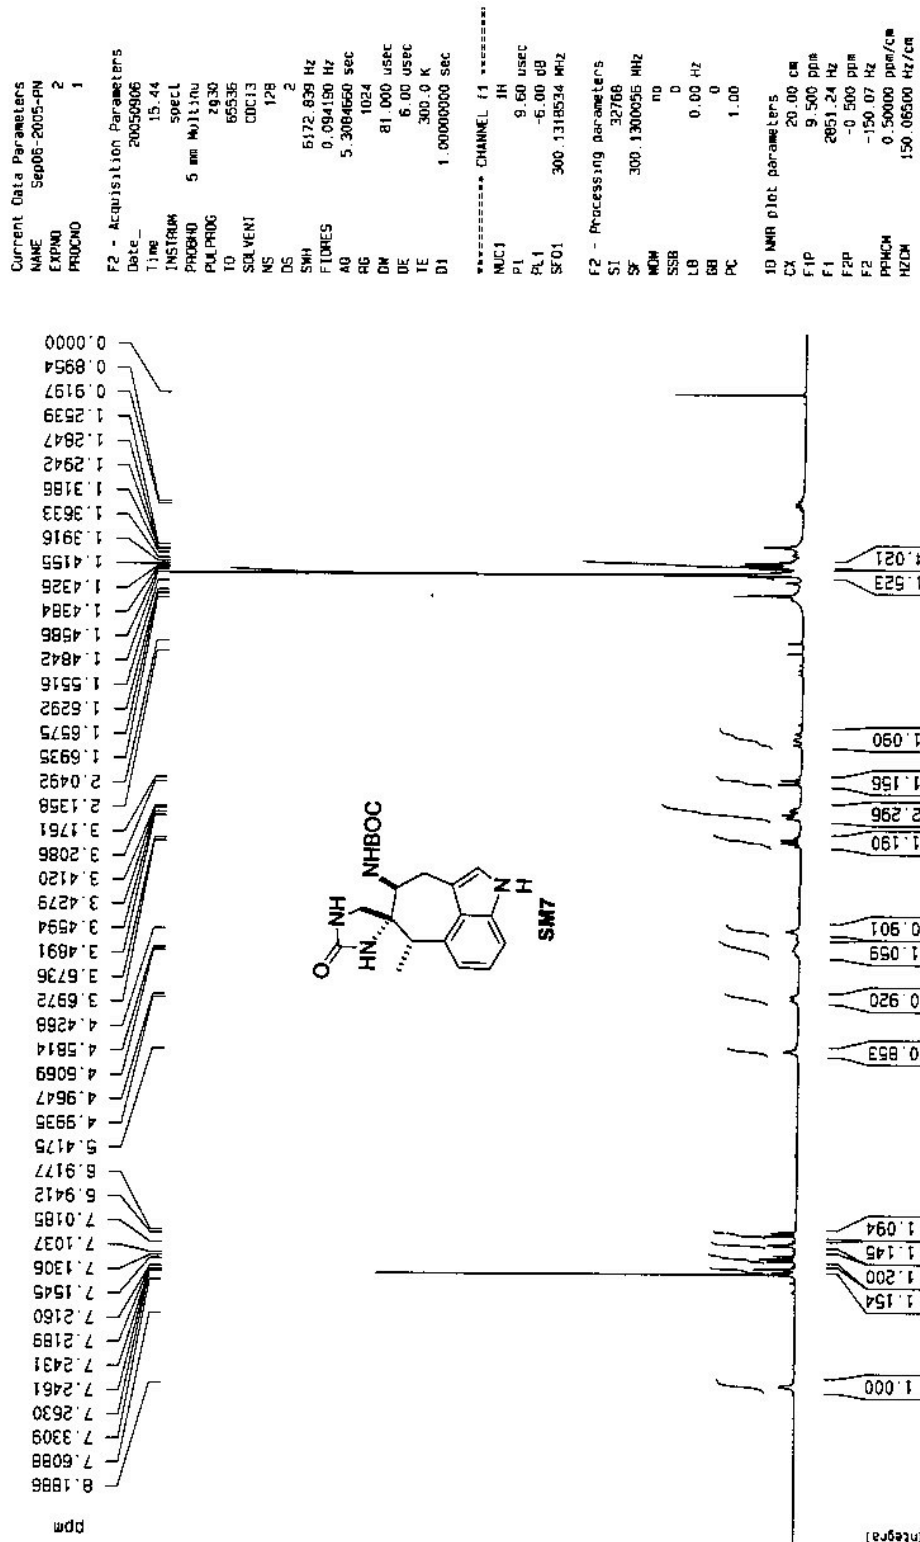

PM5\_P26.4

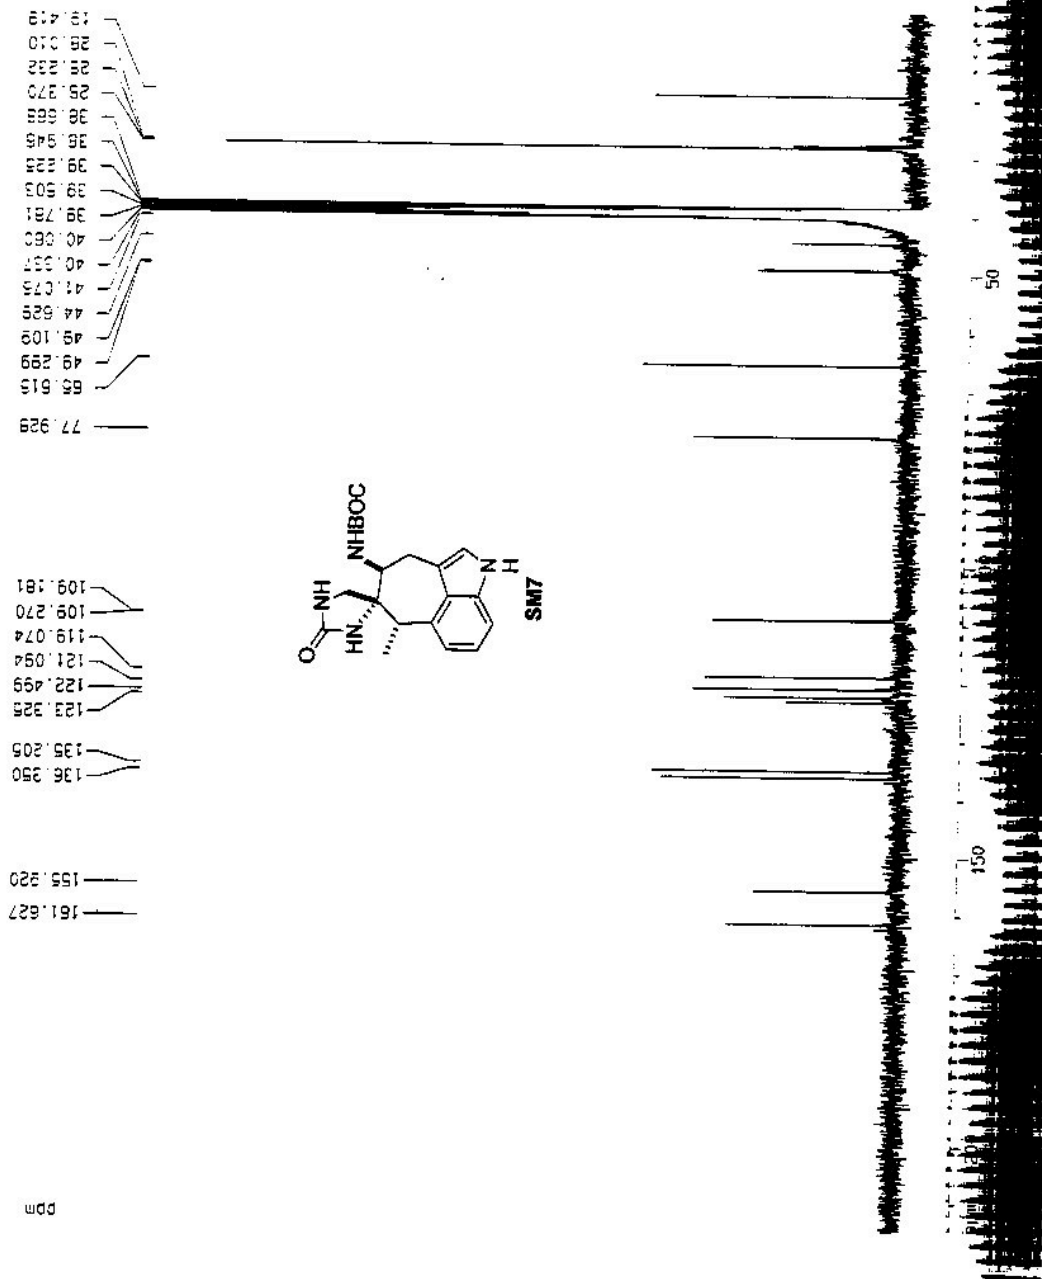

PN5\_P248\_purified in DMSO

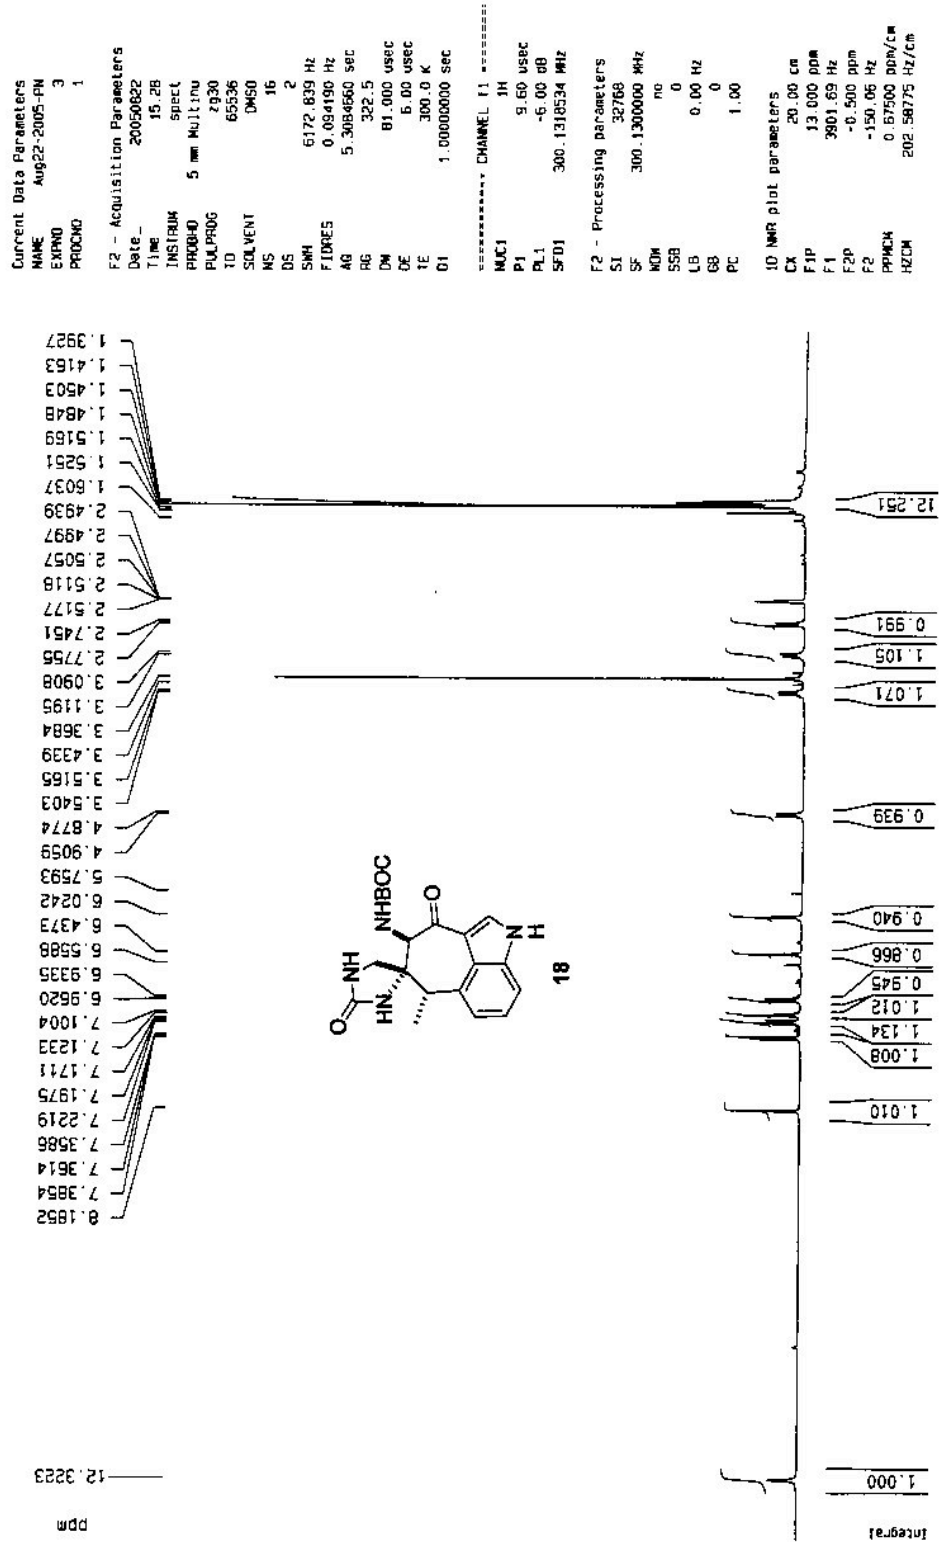

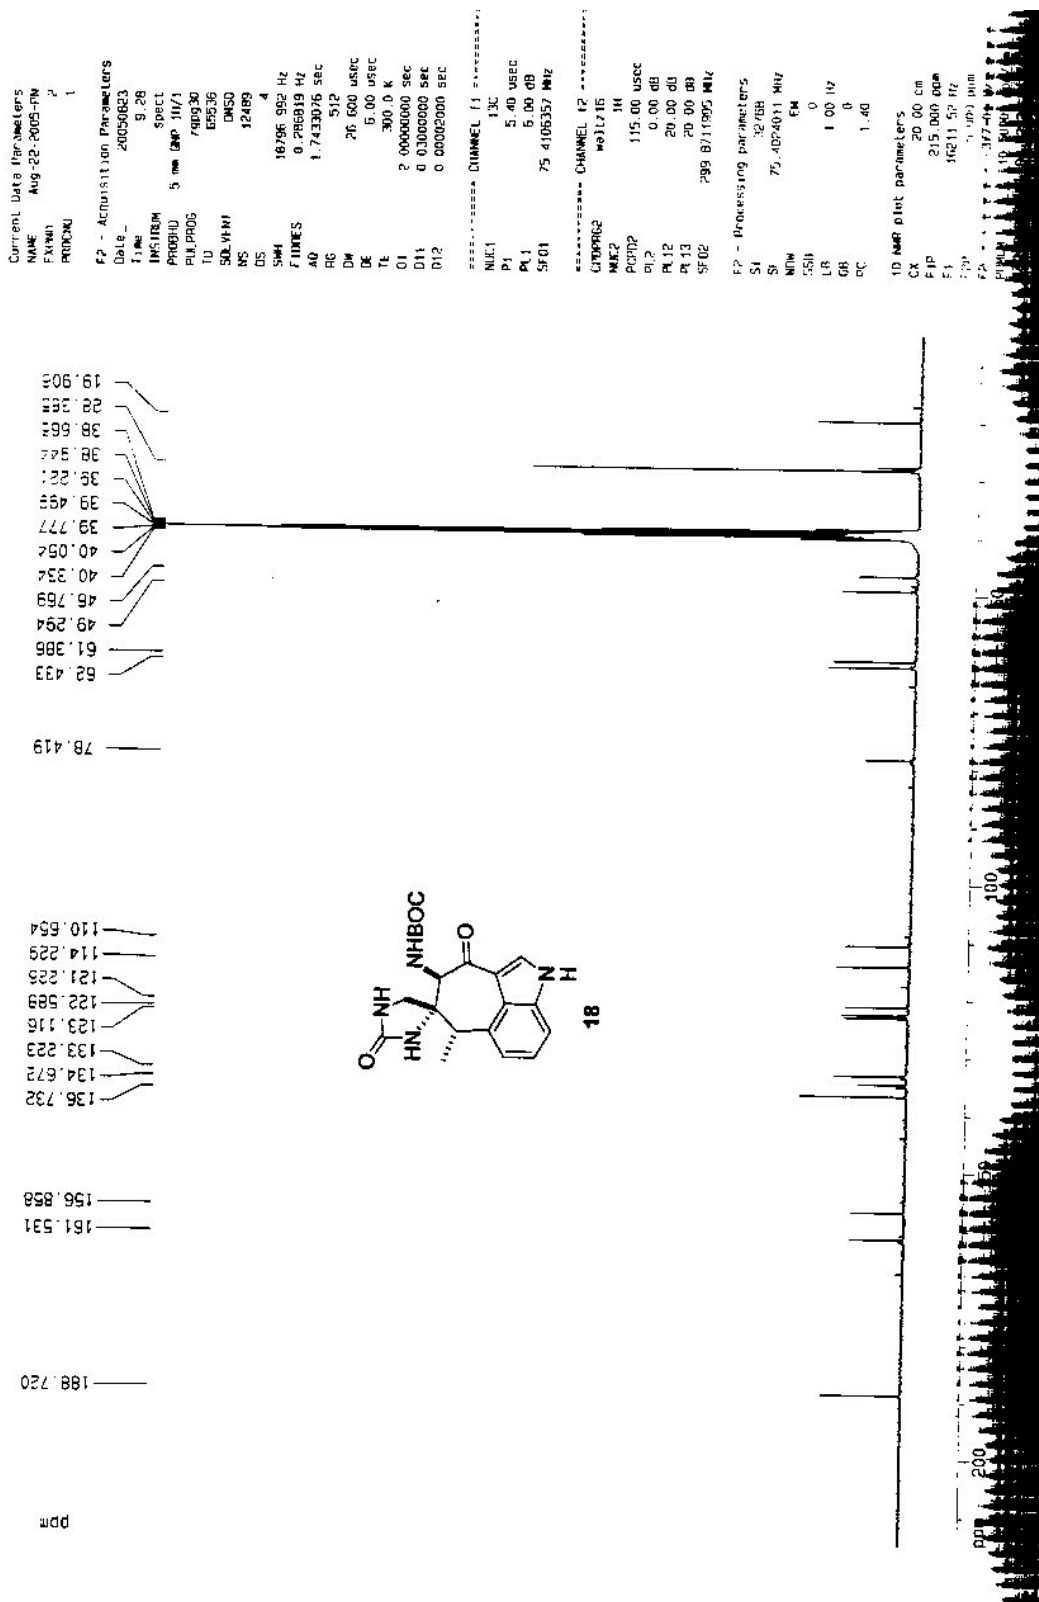

Macromodel 9.0 calculations (MMFF parameter set)

10000-step directed Monte Carlo search about all rotatable bonds. Each minima shown was found over 450 times.

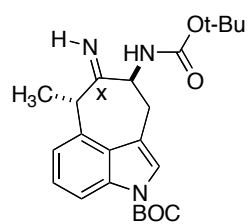

0.0 Kcal/mol

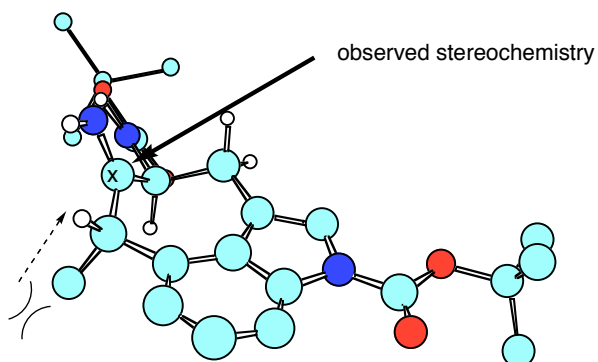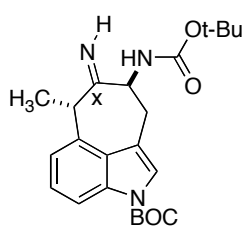

2.8 Kcal/mol

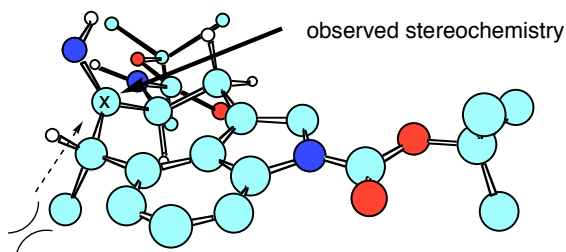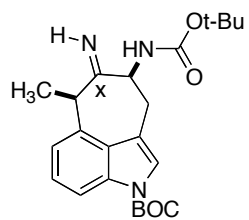

3.0 Kcal/mol

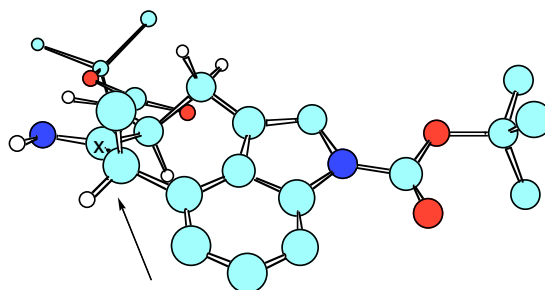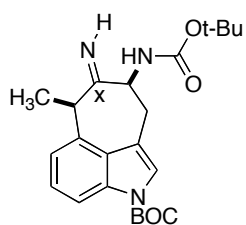

3.6 Kcal/mol

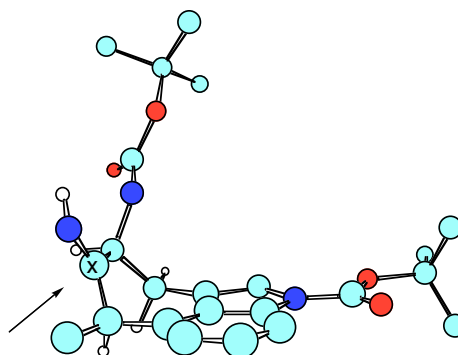

Supplement: Supplementary file 1 [file 5090917]
